# Supplementary material for: Computational study on the reactivity of imidazolium-functionalized manganese bipyridyl tricarbonyl electrocatalysts [Mn[bpyMe(Im-R)](CO)3Br]+ (R = Me, Me2 and Me4) for CO2-to-CO conversion over H2 formation
Source: Royal Society of Chemistry journal article supplement (doi:10.1039/d1cp01576a), 2021-01-01
Supplement: d1cp01576a2.pdf [file d1cp01576a2.pdf]

**Tables of Cartesian Coordinates (Å)  
and Computed Energies (a.u.) for all  
Stationary at the ωB97X-D/BS1(SMD)  
level of theory.**

**1<sub>C2</sub><sup>+</sup>**

Energy = -4902.656669  
Enthalpy 0K = -4902.314953  
Enthalpy 298K = -4902.287725  
Free Energy 298K = -4902.372191  
Nimag = 0 (30.5366 cm<sup>-1</sup>)

N -4.15460 -0.19417 -0.99394  
C -5.03107 -0.44556 0.03727  
C -4.42048 -0.04218 1.18474  
N -3.18486 0.45032 0.82786  
C -3.04860 0.34827 -0.49553  
C -2.16979 0.90947 1.78043  
C -1.12462 1.76362 1.11268  
N 0.02263 1.21884 0.66610  
C 0.93606 2.03041 0.09394  
C 0.69884 3.39289 -0.09713  
C -0.49795 3.94513 0.32980  
C -1.41546 3.11820 0.95958  
Mn 0.59292 -0.83620 0.53371  
C 0.94871 -0.94839 2.29594  
O 1.16965 -1.01725 3.41930  
H -6.01003 -0.88433 -0.13528  
C 2.24455 1.42383 -0.25354  
N 2.43113 0.14725 0.14387  
C 3.65873 -0.39717 0.04628  
C 4.70728 0.30177 -0.56454  
C 4.49255 1.57372 -1.06569  
C 3.24453 2.15716 -0.88544  
C 3.94232 -1.76161 0.59833  
Br 0.09724 -0.63085 -1.98479  
C -1.00239 -1.66122 0.70883  
O -1.94868 -2.30762 0.79722  
C 1.14362 -2.52257 0.16293  
O 1.36656 -3.61840 -0.08776  
H 5.29284 2.12154 -1.56627  
H -0.70194 5.00775 0.18958  
H 3.06582 3.17268 -1.23266  
H 1.44910 4.02826 -0.56298  
H -2.36245 3.50630 1.33705  
H 5.68662 -0.17298 -0.63809  
H -4.75267 -0.06241 2.21888  
H -2.15752 0.60040 -1.07298  
H -1.72852 0.04156 2.28329  
H -2.69247 1.50368 2.53922  
C -4.39766 -0.47075 -2.40263  
H 3.35826 -1.96947 1.50306  
H 5.00841 -1.84216 0.84806  
H 3.72586 -2.53974 -0.14789  
H -3.45619 -0.36087 -2.95203  
H -4.76473 -1.49858 -2.50618

H -5.14225 0.23350 -2.79461

**1<sub>C5</sub><sup>+</sup>**

Energy = -4902.656267  
Enthalpy 0K = -4902.314597  
Enthalpy 298K = -4902.287321  
Free Energy 298K = -4902.372717  
Nimag = 0 (26.2408 cm<sup>-1</sup>)

Br -0.41636 -0.50719 2.12386  
Mn -0.73702 -0.89495 -0.39506  
N 3.25122 0.31966 -0.58715  
O -1.70795 -3.56942 0.39716  
O 1.75450 -2.47295 -0.32291  
N -2.54035 0.20883 -0.25440  
N -0.04150 1.11472 -0.62000  
C -2.32313 1.50438 0.05695  
N 5.20297 -0.15457 0.21517  
C -4.64664 1.85527 0.52393  
H -5.46936 2.49400 0.85013  
O -1.08579 -1.30689 -3.29296  
C 0.82806 -1.79474 -0.36471  
C -3.80332 -0.25893 -0.27241  
C -0.94132 2.00404 -0.14828  
C 0.66228 3.79200 -0.24145  
H 0.93913 4.83443 -0.07663  
C -3.34987 2.34995 0.46828  
H -3.15498 3.38666 0.73434  
C -0.61182 3.34182 0.07025  
H -1.34377 4.03838 0.47312  
C 1.56023 2.89269 -0.79290  
H 2.56387 3.20236 -1.08929  
C 1.17615 1.56354 -0.96797  
C -4.87517 0.55060 0.12281  
H -5.88451 0.13739 0.10562  
C 4.53416 0.12916 -0.89668  
H 4.96018 0.19956 -1.89493  
C -1.40400 -2.51333 0.07098  
C 3.09479 0.15462 0.77400  
H 2.12670 0.24120 1.26990  
C 2.19897 0.62761 -1.55920  
H 1.74398 -0.29787 -1.92329  
H 2.68346 1.11606 -2.41313  
C 4.32386 -0.14374 1.27547  
H 4.64748 -0.34808 2.29219  
C 6.63247 -0.41842 0.30610  
H 7.06044 -0.40000 -0.70185  
H 6.78904 -1.40590 0.75705  
H 7.10625 0.35326 0.92532  
C -0.95373 -1.14505 -2.16453  
C -4.09998 -1.65684 -0.72475  
H -3.43723 -1.97577 -1.53826  
H -5.13736 -1.71755 -1.07843  
H -3.99987 -2.36700 0.10876

**2<sub>C2</sub><sup>+</sup>**  
 Energy = -4941.942678  
 Enthalpy 0K = -4941.573301  
 Enthalpy 298K = -4941.544360  
 Free Energy 298K = -4941.633469  
 Nimag = 0 (16.4833 cm<sup>-1</sup>)

|    |          |          |          |
|----|----------|----------|----------|
| Br | -0.41368 | -1.53673 | -1.68221 |
| Mn | -1.33566 | -0.81567 | 0.59392  |
| N  | 0.03656  | 0.82711  | 0.60602  |
| C  | 0.02041  | 3.21704  | 0.80466  |
| H  | -0.51711 | 4.15978  | 0.72782  |
| N  | -2.46166 | 0.72979  | -0.35710 |
| C  | 1.34479  | 3.20665  | 1.21660  |
| H  | 1.84884  | 4.13570  | 1.48764  |
| C  | -2.65940 | 3.12472  | -0.40882 |
| H  | -2.24899 | 4.10402  | -0.17111 |
| C  | -1.96916 | 1.95878  | -0.08784 |
| C  | -0.60103 | 2.00934  | 0.48725  |
| C  | -4.34927 | 1.76532  | -1.39682 |
| H  | -5.28534 | 1.64221  | -1.94297 |
| C  | 2.02455  | 1.99798  | 1.24259  |
| H  | 3.08045  | 1.96056  | 1.51249  |
| C  | 1.34295  | 0.82600  | 0.91734  |
| C  | -3.88126 | 3.02389  | -1.06173 |
| H  | -4.44529 | 3.92084  | -1.32378 |
| C  | -3.62096 | 0.62508  | -1.03483 |
| O  | 0.22822  | -2.91750 | 1.94696  |
| O  | -3.18287 | -3.11482 | 0.52704  |
| O  | -2.42547 | 0.03435  | 3.19897  |
| N  | 3.48504  | -0.32110 | 0.49008  |
| C  | -2.52455 | -2.17579 | 0.51208  |
| C  | -4.15202 | -0.71890 | -1.42443 |
| H  | -3.34271 | -1.36616 | -1.78723 |
| H  | -4.64596 | -1.20515 | -0.57055 |
| H  | -4.90262 | -0.60890 | -2.21758 |
| C  | -0.31958 | -2.05800 | 1.41796  |
| C  | 2.08928  | -0.49020 | 0.86785  |
| H  | 2.08215  | -0.97784 | 1.85077  |
| H  | 1.60891  | -1.15651 | 0.13919  |
| C  | -1.99847 | -0.28208 | 2.18267  |
| C  | 4.56599  | -0.46422 | 1.33528  |
| N  | 5.25385  | 0.08606  | -0.68047 |
| C  | 5.67732  | -0.20908 | 0.59771  |
| C  | 3.91993  | 0.01241  | -0.73571 |
| C  | 3.08637  | 0.30247  | -1.92360 |
| H  | 2.07585  | -0.11533 | -1.81436 |
| H  | 3.00417  | 1.39175  | -2.06501 |
| H  | 3.54667  | -0.12735 | -2.82351 |
| C  | 6.11607  | 0.42425  | -1.80352 |
| H  | 7.14698  | 0.48603  | -1.44009 |
| H  | 6.04631  | -0.35232 | -2.57648 |
| H  | 5.81765  | 1.39327  | -2.22291 |
| H  | 4.44318  | -0.73619 | 2.37977  |
| H  | 6.72999  | -0.21443 | 0.86567  |

**2<sub>C5</sub><sup>+</sup>**  
 Energy = -4941.942733  
 Enthalpy 0K = -4941.573560  
 Enthalpy 298K = -4941.544582  
 Free Energy 298K = -4941.633129  
 Nimag = 0 (25.5879 cm<sup>-1</sup>)

|    |          |          |          |
|----|----------|----------|----------|
| C  | -4.02639 | -0.04573 | -1.60206 |
| N  | -4.95934 | -0.18333 | -0.59665 |
| C  | -4.37843 | 0.06916  | 0.58114  |
| N  | -3.09225 | 0.36848  | 0.34129  |
| C  | -2.85180 | 0.29971  | -1.01657 |
| C  | -2.11257 | 0.69293  | 1.37990  |
| C  | -1.03717 | 1.60461  | 0.84749  |
| N  | 0.18749  | 1.13079  | 0.56263  |
| C  | 1.13054  | 2.00189  | 0.14458  |
| C  | 0.84384  | 3.34836  | -0.08139 |
| C  | -0.43497 | 3.82515  | 0.16394  |
| C  | -1.38126 | 2.94304  | 0.65995  |
| Mn | 0.84971  | -0.89081 | 0.37019  |
| C  | 0.95642  | -1.15788 | 2.14682  |
| O  | 1.01925  | -1.33553 | 3.27904  |
| C  | -6.35823 | -0.53814 | -0.79746 |
| C  | 2.50914  | 1.47111  | 0.00722  |
| N  | 2.68233  | 0.17297  | 0.33454  |
| C  | 3.93194  | -0.32236 | 0.41590  |
| C  | 5.03919  | 0.46018  | 0.06652  |
| C  | 4.85895  | 1.76657  | -0.35346 |
| C  | 3.57252  | 2.29060  | -0.36093 |
| C  | 4.17438  | -1.72258 | 0.89279  |
| Br | 0.69570  | -0.48986 | -2.16312 |
| C  | -0.73366 | -1.74998 | 0.24098  |
| O  | -1.67137 | -2.40589 | 0.14037  |
| C  | 1.50669  | -2.52281 | -0.06126 |
| O  | 1.80708  | -3.58490 | -0.37110 |
| H  | 5.71017  | 2.38423  | -0.64538 |
| H  | -0.67956 | 4.87440  | -0.00851 |
| H  | 3.41248  | 3.32922  | -0.64214 |
| H  | 1.61266  | 4.03001  | -0.43910 |
| H  | -2.39259 | 3.27305  | 0.90298  |
| H  | 6.03697  | 0.02457  | 0.13384  |
| C  | -5.02014 | 0.03535  | 1.91476  |
| H  | -1.86557 | 0.46650  | -1.44894 |
| H  | -1.69836 | -0.22651 | 1.80638  |
| H  | -2.64415 | 1.21654  | 2.18358  |
| H  | -4.28026 | -0.20943 | -2.64533 |
| H  | -6.58693 | -1.47495 | -0.27384 |
| H  | -6.52382 | -0.67382 | -1.87129 |
| H  | -7.00692 | 0.26589  | -0.42803 |
| H  | 3.45828  | -2.02287 | 1.66712  |
| H  | 5.18781  | -1.80004 | 1.30774  |
| H  | 4.11058  | -2.43694 | 0.05927  |
| H  | -6.05330 | -0.32032 | 1.83854  |
| H  | -4.46429 | -0.63372 | 2.58702  |
| H  | -5.02657 | 1.04256  | 2.35835  |

**3<sub>C2</sub><sup>+</sup>**  
 Energy = -5020.511262  
 Enthalpy 0K = -5020.086602  
 Enthalpy 298K = -5020.054214  
 Free Energy 298K = -5020.150855  
 Nimag = 0 (20.3542 cm<sup>-1</sup>)

Br -0.91038 -1.53661 -1.74423  
 Mn -1.61264 -0.79319 0.60069  
 N -0.32004 0.89779 0.39111  
 C -0.38327 3.29603 0.34384  
 H -0.95537 4.21654 0.25093  
 N -2.91388 0.67017 -0.25369  
 C 0.98877 3.35265 0.53111  
 H 1.49930 4.31370 0.60980  
 C -3.24057 3.05033 -0.29531  
 H -2.85345 4.05284 -0.12621  
 C -2.44681 1.92621 -0.08186  
 C -1.00680 2.05075 0.25872  
 C -4.98764 1.59324 -1.00462  
 H -5.98727 1.41507 -1.40313  
 C 1.70267 2.16473 0.58281  
 H 2.78783 2.17746 0.68332  
 C 1.01833 0.95302 0.50497  
 C -4.54272 2.87811 -0.74721  
 H -5.18832 3.74117 -0.91898  
 C -4.15362 0.49710 -0.75070  
 O 0.15481 -2.81419 1.81603  
 O -3.35407 -3.16632 0.80158  
 O -2.42934 0.11422 3.28518  
 N 3.17980 -0.19927 0.14419  
 C -2.74514 -2.20098 0.68786  
 C -4.66414 -0.87669 -1.05531  
 H -3.87574 -1.49507 -1.50386  
 H -5.03288 -1.36774 -0.14300  
 H -5.50740 -0.81381 -1.75521  
 C -0.47154 -1.97991 1.33505  
 C 1.78495 -0.35100 0.51763  
 H 1.76237 -0.79151 1.52147  
 H 1.30788 -1.05885 -0.17270  
 C -2.11124 -0.22843 2.23791  
 C 4.05300 -0.15533 2.51268  
 H 3.34225 0.61476 2.84880  
 H 3.67413 -1.13673 2.83760  
 H 5.01141 0.02309 3.01542  
 C 4.24173 -0.10607 1.03857  
 N 4.96244 0.03265 -1.04583  
 C 5.36973 0.03709 0.28236  
 C 3.63685 -0.11124 -1.11450  
 C 6.79873 0.17464 0.66692  
 H 7.21495 1.13104 0.31510  
 H 6.90075 0.13455 1.75832  
 H 7.40454 -0.63632 0.23480  
 C 2.82504 -0.13253 -2.35475  
 H 1.77603 -0.37552 -2.14149  
 H 2.86159 0.85154 -2.84577  
 H 3.21795 -0.88301 -3.05486

C 5.86716 0.16890 -2.17484  
 H 6.43786 1.10084 -2.07470  
 H 6.55839 -0.68356 -2.20003  
 H 5.29257 0.19779 -3.10571

**3<sub>C5</sub><sup>+</sup>**  
 Energy = -5020.511767  
 Enthalpy 0K = -5020.087292  
 Enthalpy 298K = -5020.054820  
 Free Energy 298K = -5020.151457  
 Nimag = 0 (18.2502 cm<sup>-1</sup>)

C -3.76959 0.57515 1.09590  
 N -3.31033 -0.28621 0.17498  
 C -4.36816 -0.76812 -0.58902  
 C -5.49629 -0.17374 -0.09997  
 N -5.09329 0.65195 0.94209  
 C -1.91237 -0.63832 -0.00755  
 C -1.12184 0.45694 -0.69198  
 N 0.18277 0.58493 -0.40220  
 C 0.86484 1.62806 -0.91670  
 C 0.28129 2.51702 -1.81862  
 C -1.04641 2.33948 -2.17743  
 C -1.76531 1.31105 -1.58633  
 C 2.24330 1.82242 -0.40311  
 C 3.00908 2.92595 -0.76825  
 C 4.24606 3.11435 -0.16443  
 C 4.65182 2.21764 0.80878  
 C 3.84450 1.11941 1.13003  
 N 2.67586 0.91151 0.49508  
 Mn 1.48985 -0.84382 0.47018  
 C 0.49862 -2.32773 0.18533  
 O -0.04396 -3.32440 0.01102  
 C 4.31217 0.18111 2.20107  
 C -6.00083 1.48096 1.71724  
 C -2.95387 1.33921 2.07050  
 C 2.75952 -2.03072 0.97970  
 O 3.49498 -2.86523 1.25852  
 C 0.89085 -0.59043 2.14471  
 O 0.52355 -0.44591 3.22458  
 Br 2.37099 -1.23756 -1.90718  
 C -6.92191 -0.29448 -0.50197  
 H 4.87030 3.96759 -0.43583  
 H -1.52202 3.01143 -2.89361  
 H 2.65050 3.64251 -1.50432  
 H 0.84942 3.34448 -2.23833  
 H -2.82221 1.17054 -1.81453  
 H 5.59663 2.35237 1.33698  
 C -4.17868 -1.73458 -1.70303  
 H -1.88028 -1.55811 -0.60362  
 H -1.48133 -0.87058 0.97143  
 H 3.48031 -0.20172 2.80438  
 H 5.01527 0.69916 2.86618  
 H 4.84870 -0.67326 1.76337  
 H -5.44302 2.01128 2.49521  
 H -6.48477 2.21221 1.05682  
 H -6.76499 0.84872 2.18698

|   |          |          |          |
|---|----------|----------|----------|
| H | -1.92156 | 0.97299  | 2.09372  |
| H | -2.93783 | 2.40480  | 1.79639  |
| H | -3.37542 | 1.24711  | 3.08093  |
| H | -7.53558 | -0.68611 | 0.32370  |
| H | -7.33517 | 0.68221  | -0.79626 |
| H | -7.01546 | -0.97903 | -1.35379 |
| H | -5.13919 | -1.92209 | -2.19851 |
| H | -3.47559 | -1.34326 | -2.45390 |
| H | -3.78995 | -2.69778 | -1.33831 |

### 1c2(red1-Br)

|                  |                                 |
|------------------|---------------------------------|
| Energy           | = -4902.752424                  |
| Enthalpy 0K      | = -4902.414330                  |
| Enthalpy 298K    | = -4902.386708                  |
| Free Energy 298K | = -4902.473562                  |
| Nimag            | = 0 (22.3693 cm <sup>-1</sup> ) |

|    |          |          |          |
|----|----------|----------|----------|
| N  | -4.05076 | -0.21311 | -0.98112 |
| C  | -4.95715 | -0.42869 | 0.03252  |
| C  | -4.38755 | 0.03688  | 1.17844  |
| N  | -3.14883 | 0.53065  | 0.83721  |
| C  | -2.96933 | 0.37086  | -0.47322 |
| C  | -2.15319 | 1.04251  | 1.78678  |
| C  | -1.09013 | 1.84987  | 1.08655  |
| N  | 0.02303  | 1.23464  | 0.62673  |
| C  | 0.98140  | 2.02051  | -0.00135 |
| C  | 0.71345  | 3.39642  | -0.27276 |
| C  | -0.43974 | 3.98287  | 0.16728  |
| C  | -1.36073 | 3.19450  | 0.90120  |
| Mn | 0.56864  | -0.80721 | 0.56468  |
| C  | 0.96247  | -0.84009 | 2.30819  |
| O  | 1.21295  | -0.84448 | 3.43063  |
| H  | -5.92384 | -0.89031 | -0.14921 |
| C  | 2.23062  | 1.41305  | -0.30194 |
| N  | 2.40662  | 0.10488  | 0.10426  |
| C  | 3.64423  | -0.43619 | 0.04782  |
| C  | 4.72224  | 0.23730  | -0.51808 |
| C  | 4.52591  | 1.52360  | -1.06056 |
| C  | 3.29500  | 2.11307  | -0.94232 |
| C  | 3.89239  | -1.80909 | 0.60819  |
| Br | -0.00058 | -0.75836 | -2.00694 |
| C  | -1.02770 | -1.59534 | 0.82217  |
| O  | -1.97471 | -2.23329 | 0.98018  |
| C  | 1.07416  | -2.51260 | 0.24971  |
| O  | 1.26148  | -3.62790 | 0.04577  |
| H  | 5.34867  | 2.05181  | -1.54854 |
| H  | -0.64084 | 5.03802  | -0.02979 |
| H  | 3.13625  | 3.11889  | -1.32929 |
| H  | 1.44520  | 3.99215  | -0.81734 |
| H  | -2.28319 | 3.61941  | 1.29893  |
| H  | 5.70198  | -0.24156 | -0.54254 |
| H  | -4.75138 | 0.05756  | 2.20183  |
| H  | -2.05716 | 0.59584  | -1.02958 |
| H  | -1.72941 | 0.19655  | 2.34151  |
| H  | -2.69354 | 1.67708  | 2.49898  |
| C  | -4.23105 | -0.55800 | -2.38356 |
| H  | 3.33925  | -1.97846 | 1.54144  |

|   |          |          |          |
|---|----------|----------|----------|
| H | 4.96316  | -1.93999 | 0.81419  |
| H | 3.60234  | -2.59051 | -0.10859 |
| H | -3.24455 | -0.61101 | -2.85926 |
| H | -4.72058 | -1.53652 | -2.44864 |
| H | -4.84830 | 0.20118  | -2.88091 |

### 1c5(red1-Br)

|                  |                                 |
|------------------|---------------------------------|
| Energy           | = -4902.750647                  |
| Enthalpy 0K      | = -4902.412224                  |
| Enthalpy 298K    | = -4902.384686                  |
| Free Energy 298K | = -4902.471243                  |
| Nimag            | = 0 (28.8855 cm <sup>-1</sup> ) |

|    |          |          |          |
|----|----------|----------|----------|
| Br | -0.34541 | -0.66118 | 2.13836  |
| Mn | -0.72346 | -0.86896 | -0.44219 |
| N  | 3.21972  | 0.36546  | -0.58669 |
| O  | -1.62962 | -3.60042 | 0.20502  |
| O  | 1.77387  | -2.43050 | -0.51755 |
| N  | -2.52860 | 0.18799  | -0.20614 |
| N  | -0.03909 | 1.12725  | -0.58923 |
| C  | -2.29899 | 1.51035  | 0.12222  |
| N  | 5.14647  | -0.14988 | 0.25217  |
| C  | -4.64407 | 1.82826  | 0.63178  |
| H  | -5.47102 | 2.44758  | 0.98787  |
| O  | -1.13118 | -1.09183 | -3.34331 |
| C  | 0.84404  | -1.75041 | -0.49381 |
| C  | -3.80017 | -0.26946 | -0.22597 |
| C  | -0.98508 | 2.01029  | -0.08394 |
| C  | 0.60418  | 3.84467  | -0.18215 |
| H  | 0.87456  | 4.88669  | 0.00246  |
| C  | -3.36897 | 2.32700  | 0.59444  |
| H  | -3.17794 | 3.35140  | 0.91198  |
| C  | -0.62996 | 3.37108  | 0.16673  |
| H  | -1.35281 | 4.04296  | 0.62838  |
| C  | 1.51645  | 2.96001  | -0.80660 |
| H  | 2.49978  | 3.29514  | -1.14026 |
| C  | 1.15192  | 1.63269  | -0.96892 |
| C  | -4.87738 | 0.51399  | 0.17722  |
| H  | -5.88588 | 0.09975  | 0.14360  |
| C  | 4.50767  | 0.17295  | -0.86811 |
| H  | 4.96199  | 0.27182  | -1.85122 |
| C  | -1.35682 | -2.51474 | -0.05692 |
| C  | 3.02549  | 0.16157  | 0.76284  |
| H  | 2.04132  | 0.23137  | 1.23145  |
| C  | 2.19273  | 0.72253  | -1.57344 |
| H  | 1.75012  | -0.18919 | -1.98612 |
| H  | 2.70760  | 1.24296  | -2.38916 |
| C  | 4.23867  | -0.16307 | 1.28811  |
| H  | 4.53290  | -0.40324 | 2.30592  |
| C  | 6.56955  | -0.43182 | 0.37224  |
| H  | 7.03066  | -0.35922 | -0.61866 |
| H  | 6.70624  | -1.44503 | 0.76989  |
| H  | 7.03017  | 0.29825  | 1.04929  |
| C  | -0.97412 | -1.01150 | -2.20617 |
| C  | -4.08880 | -1.66950 | -0.69177 |
| H  | -3.48310 | -1.94564 | -1.56510 |
| H  | -5.14858 | -1.76251 | -0.96425 |

H -3.89241 -2.40086 0.10519

### 2c2(red1-Br)

Energy = -4942.038330  
Enthalpy 0K = -4941.672795  
Enthalpy 298K = -4941.643401  
Free Energy 298K = -4941.734134  
Nimag = 0 (16.1172 cm<sup>-1</sup>)

Br -0.32908 -1.71581 -1.59190  
Mn -1.34504 -0.77855 0.62929  
N 0.02146 0.82647 0.61686  
C -0.00029 3.25815 0.78163  
H -0.55245 4.19631 0.72469  
N -2.43368 0.70031 -0.42296  
C 1.31448 3.25902 1.15958  
H 1.81784 4.19306 1.41934  
C -2.70446 3.12111 -0.46647  
H -2.34410 4.10975 -0.18280  
C -1.94531 1.96172 -0.13176  
C -0.64791 2.03034 0.44689  
C -4.29372 1.70177 -1.56414  
H -5.19324 1.56181 -2.16517  
C 2.02505 2.03265 1.18130  
H 3.08970 2.00788 1.41542  
C 1.33536 0.86169 0.90735  
C -3.87272 2.98882 -1.17118  
H -4.45832 3.87078 -1.44238  
C -3.55780 0.58959 -1.16181  
O 0.17995 -2.77155 2.17451  
O -3.20747 -3.06602 0.60259  
O -2.53255 0.23601 3.12168  
N 3.47380 -0.30885 0.49607  
C -2.53590 -2.13362 0.56137  
C -4.04218 -0.77274 -1.56694  
H -3.19983 -1.41032 -1.86904  
H -4.57453 -1.26425 -0.73913  
H -4.74805 -0.68986 -2.40457  
C -0.35644 -1.95917 1.55982  
C 2.08079 -0.45908 0.89929  
H 2.09014 -0.91799 1.89585  
H 1.59082 -1.15044 0.20025  
C -2.06514 -0.15302 2.14619  
C 4.56858 -0.44744 1.32117  
N 5.22170 0.09835 -0.70679  
C 5.66798 -0.19289 0.56432  
C 3.88567 0.02267 -0.73616  
C 3.02644 0.31228 -1.90595  
H 2.03852 -0.15902 -1.79855  
H 2.88741 1.40053 -2.00557  
H 3.49704 -0.06149 -2.82505  
C 6.06285 0.43911 -1.84436  
H 7.10122 0.49344 -1.50132  
H 5.97509 -0.33164 -2.62133  
H 5.76218 1.41245 -2.25220  
H 6.72514 -0.19610 0.81392  
H 4.46488 -0.71522 2.36877

### 2c5(red1-Br)

Energy = -4942.036877  
Enthalpy 0K = -4941.670664  
Enthalpy 298K = -4941.641435  
Free Energy 298K = -4941.731894  
Nimag = 0 (24.5537 cm<sup>-1</sup>)

C -3.91496 0.02173 -1.60962  
N -4.84148 -0.19231 -0.61105  
C -4.28726 0.10278 0.57066  
N -3.02977 0.50537 0.33980  
C -2.77524 0.45892 -1.01441  
C -2.08642 0.89969 1.39236  
C -0.96583 1.74596 0.84249  
N 0.21260 1.17194 0.52538  
C 1.23528 1.99775 0.07690  
C 0.97344 3.37467 -0.19734  
C -0.24872 3.91961 0.08285  
C -1.24238 3.09170 0.66067  
Mn 0.78277 -0.85732 0.40641  
C 0.91206 -1.02719 2.18034  
O 0.99608 -1.12681 3.32399  
C -6.20612 -0.65687 -0.81901  
C 2.52839 1.42279 -0.04695  
N 2.65973 0.09147 0.29784  
C 3.89828 -0.43834 0.40057  
C 5.04240 0.27863 0.06270  
C 4.91455 1.60112 -0.40976  
C 3.67070 2.17359 -0.45264  
C 4.07411 -1.84878 0.89104  
Br 0.59787 -0.62018 -2.19245  
C -0.83602 -1.64099 0.34541  
O -1.80194 -2.26779 0.30189  
C 1.34526 -2.53389 0.04519  
O 1.57741 -3.63039 -0.21104  
H 5.79680 2.16912 -0.71513  
H -0.44946 4.97398 -0.11955  
H 3.55806 3.20594 -0.78188  
H 1.75866 4.00012 -0.62155  
H -2.22046 3.48508 0.94130  
H 6.02097 -0.19312 0.16124  
C -4.92275 0.00496 1.90416  
H -1.79485 0.68117 -1.43349  
H -1.71271 0.00268 1.89980  
H -2.64867 1.48786 2.12795  
H -4.14699 -0.16372 -2.65431  
H -6.36697 -1.60302 -0.28694  
H -6.35164 -0.81746 -1.89239  
H -6.91997 0.09729 -0.46440  
H 3.38553 -2.08738 1.71238  
H 5.10203 -1.99478 1.24924  
H 3.90594 -2.57433 0.08229  
H -5.92438 -0.43194 1.82732  
H -4.31134 -0.62367 2.56757  
H -5.00760 1.00302 2.36009

**3c2(red1-Br)**

Energy = -5020.606762  
 Enthalpy 0K = -5020.185622  
 Enthalpy 298K = -5020.152874  
 Free Energy 298K = -5020.250763  
 Nimag = 0 (19.0955 cm<sup>-1</sup>)

Br -0.85087 -1.61267 -1.74757  
 Mn -1.63244 -0.78965 0.60606  
 N -0.31644 0.85146 0.48276  
 C -0.36272 3.28255 0.64725  
 H -0.93318 4.21112 0.66467  
 N -2.87424 0.68152 -0.27104  
 C 0.99000 3.30971 0.84733  
 H 1.50505 4.25409 1.03745  
 C -3.19783 3.09599 -0.25400  
 H -2.82930 4.09046 -0.00394  
 C -2.38022 1.95029 -0.02437  
 C -1.02418 2.04208 0.39497  
 C -4.87665 1.65355 -1.17252  
 H -5.83774 1.49967 -1.66502  
 C 1.72076 2.09713 0.77877  
 H 2.80679 2.09502 0.87107  
 C 1.02299 0.91146 0.60669  
 C -4.43820 2.94552 -0.81735  
 H -5.06916 3.81736 -1.00730  
 C -4.07578 0.55403 -0.87297  
 O 0.08443 -2.81099 1.88873  
 O -3.41788 -3.13435 0.72070  
 O -2.54296 0.12559 3.24875  
 N 3.16415 -0.23572 0.12417  
 C -2.78600 -2.17771 0.63116  
 C -4.57775 -0.81332 -1.23754  
 H -3.76722 -1.42512 -1.65712  
 H -4.98880 -1.33058 -0.35801  
 H -5.38638 -0.73460 -1.97682  
 C -0.52442 -1.98047 1.37299  
 C 1.77859 -0.40031 0.53461  
 H 1.78838 -0.89499 1.51253  
 H 1.27679 -1.07140 -0.17562  
 C -2.18513 -0.22648 2.21461  
 C 4.14281 -0.49091 2.43532  
 H 3.46968 0.24399 2.90256  
 H 3.74991 -1.49742 2.64659  
 H 5.12777 -0.40408 2.91033  
 C 4.26403 -0.25129 0.97266  
 N 4.89119 0.15250 -1.10751  
 C 5.35794 -0.00804 0.19098  
 C 3.56216 0.01340 -1.13079  
 C 6.80306 0.08963 0.52532  
 H 7.20989 1.07371 0.24647  
 H 6.95136 -0.04980 1.60310  
 H 7.38687 -0.67871 -0.00451  
 C 2.68255 0.16494 -2.31465  
 H 1.66688 -0.19640 -2.10305  
 H 2.62291 1.22505 -2.60527  
 H 3.08014 -0.40499 -3.16553

C 5.74381 0.44191 -2.24746  
 H 6.27876 1.38495 -2.07574  
 H 6.46897 -0.37095 -2.38298  
 H 5.13286 0.53593 -3.15047

**3c5(red1-Br)**

Energy = -5020.605410  
 Enthalpy 0K = -5020.184182  
 Enthalpy 298K = -5020.151413  
 Free Energy 298K = -5020.249732  
 Nimag = 0 (15.4183 cm<sup>-1</sup>)

Br 0.83806 -1.61960 1.76277  
 Mn 1.62357 -0.80185 -0.59437  
 N 0.32625 0.85867 -0.50033  
 C 0.41458 3.28185 -0.74374  
 H 1.00079 4.20015 -0.77981  
 N 2.87561 0.66776 0.27184  
 C -0.93314 3.32267 -0.97430  
 H -1.42902 4.26796 -1.20635  
 C 3.22937 3.07771 0.22022  
 H 2.87440 4.07249 -0.04785  
 C 2.40096 1.93851 -0.00180  
 C 1.05175 2.04001 -0.44077  
 C 4.87928 1.62946 1.18140  
 H 5.83277 1.47167 1.68728  
 C -1.68457 2.12442 -0.87884  
 H -2.76921 2.13587 -0.98490  
 C -1.01011 0.93612 -0.64655  
 C 4.46062 2.92113 0.80178  
 H 5.09922 3.78829 0.98762  
 C 4.06878 0.53499 0.88905  
 O -0.12067 -2.82041 -1.84449  
 O 3.39567 -3.15759 -0.68856  
 O 2.54278 0.07094 -3.24816  
 N -3.16386 -0.16153 -0.10444  
 C 2.76748 -2.19783 -0.60657  
 C 4.55070 -0.83300 1.27752  
 H 3.72789 -1.43041 1.69411  
 H 4.96669 -1.36564 0.40951  
 H 5.35123 -0.75385 2.02557  
 C 0.50131 -1.99054 -1.34357  
 C -1.78619 -0.35905 -0.52445  
 H -1.80258 -0.89588 -1.47970  
 H -1.29197 -1.00382 0.21583  
 C 2.18151 -0.26301 -2.20904  
 C -2.56698 0.40919 2.27755  
 H -1.82256 -0.39958 2.34120  
 H -2.01435 1.34631 2.10562  
 H -3.08546 0.48664 3.24130  
 C -3.54990 0.16835 1.18796  
 N -5.31784 -0.04954 -0.12436  
 C -4.91363 0.23887 1.17458  
 C -4.24431 -0.28224 -0.88801  
 C -5.88812 0.55205 2.25286  
 H -6.58116 -0.28653 2.42116  
 H -5.35697 0.75196 3.19159

|   |          |          |          |
|---|----------|----------|----------|
| H | -6.48811 | 1.44015  | 2.00187  |
| C | -4.20736 | -0.61197 | -2.33463 |
| H | -3.44004 | -0.00639 | -2.83613 |
| H | -3.96291 | -1.67494 | -2.48155 |
| H | -5.17039 | -0.40728 | -2.81418 |
| C | -6.71233 | -0.08321 | -0.53322 |
| H | -7.26048 | -0.78997 | 0.10260  |
| H | -7.15200 | 0.91763  | -0.43255 |
| H | -6.78893 | -0.41062 | -1.57384 |

**1<sub>C2</sub><sup>+</sup>(red1)**

|                  |                                 |
|------------------|---------------------------------|
| Energy           | = -2328.673243                  |
| Enthalpy 0K      | = -2328.334223                  |
| Enthalpy 298K    | = -2328.308659                  |
| Free Energy 298K | = -2328.390209                  |
| Nimag            | = 0 (20.4469 cm <sup>-1</sup> ) |

|    |          |          |          |
|----|----------|----------|----------|
| C  | -3.53918 | 1.35555  | 0.93886  |
| C  | -2.30507 | 0.95067  | 0.43217  |
| N  | -1.95317 | -0.35060 | 0.34903  |
| C  | -2.78427 | -1.29325 | 0.84511  |
| C  | -4.02683 | -0.94005 | 1.37894  |
| C  | -4.41931 | 0.39010  | 1.40740  |
| C  | -1.26666 | 1.92649  | 0.02354  |
| N  | -0.06809 | 1.40862  | -0.32506 |
| C  | 0.96544  | 2.25416  | -0.51804 |
| C  | 0.80965  | 3.63561  | -0.46158 |
| C  | -0.44731 | 4.17115  | -0.20628 |
| C  | -1.49425 | 3.30460  | 0.06099  |
| C  | 2.34686  | 1.71976  | -0.80392 |
| N  | 2.78398  | 0.67661  | 0.11877  |
| C  | 3.67196  | -0.32529 | -0.20220 |
| C  | 3.84810  | -1.07249 | 0.92067  |
| N  | 3.06358  | -0.51241 | 1.90231  |
| C  | 2.43260  | 0.54377  | 1.39776  |
| C  | 2.90466  | -1.03452 | 3.25130  |
| Mn | -0.26333 | -0.63850 | -0.85746 |
| C  | 0.59996  | -1.92511 | 0.06878  |
| O  | 1.15000  | -2.81294 | 0.57306  |
| C  | -2.36756 | -2.73172 | 0.84468  |
| C  | -1.18664 | -1.69180 | -1.97681 |
| O  | -1.74272 | -2.40064 | -2.70689 |
| C  | 0.97716  | -0.69374 | -2.13890 |
| O  | 1.74274  | -0.82417 | -3.00244 |
| H  | 4.44963  | -1.95840 | 1.10262  |
| H  | -5.39333 | 0.67700  | 1.80771  |
| H  | -0.60074 | 5.25113  | -0.18321 |
| H  | -3.81316 | 2.40782  | 0.98152  |
| H  | -2.47680 | 3.70258  | 0.30729  |
| H  | 1.67419  | 4.28149  | -0.61874 |
| H  | -4.67873 | -1.72327 | 1.76775  |
| H  | 4.09429  | -0.42048 | -1.19840 |
| H  | 1.73801  | 1.18093  | 1.94017  |
| H  | 2.40229  | 1.30429  | -1.81747 |
| H  | 3.06507  | 2.54791  | -0.75279 |
| H  | -2.21614 | -3.11128 | -0.17461 |
| H  | -3.13420 | -3.34725 | 1.33172  |

|   |          |          |         |
|---|----------|----------|---------|
| H | -1.42156 | -2.85990 | 1.38847 |
| H | 2.32012  | -0.32090 | 3.84176 |
| H | 2.38057  | -1.99751 | 3.20721 |
| H | 3.89364  | -1.16838 | 3.70557 |

**1<sub>C5</sub><sup>+</sup>(red1)**

|                  |                                 |
|------------------|---------------------------------|
| Energy           | = -2328.674010                  |
| Enthalpy 0K      | = -2328.335029                  |
| Enthalpy 298K    | = -2328.309490                  |
| Free Energy 298K | = -2328.390416                  |
| Nimag            | = 0 (29.4621 cm <sup>-1</sup> ) |

|    |          |          |          |
|----|----------|----------|----------|
| C  | -2.25040 | 1.06644  | -1.69370 |
| N  | -2.56807 | 1.09152  | -0.35414 |
| C  | -3.45280 | 0.12597  | -0.10663 |
| N  | -3.71026 | -0.51698 | -1.24014 |
| C  | -2.96704 | 0.05124  | -2.24923 |
| C  | -2.06667 | 2.03528  | 0.63962  |
| C  | -0.61275 | 2.38900  | 0.44491  |
| N  | 0.30524  | 1.41706  | 0.26752  |
| C  | 1.57538  | 1.77757  | -0.02049 |
| C  | 1.99080  | 3.11127  | 0.00758  |
| C  | 1.05939  | 4.10374  | 0.26511  |
| C  | -0.26983 | 3.73761  | 0.44306  |
| C  | 2.48131  | 0.68096  | -0.43685 |
| C  | 3.75501  | 0.92858  | -0.94639 |
| C  | 4.50294  | -0.13897 | -1.42361 |
| C  | 3.94368  | -1.40822 | -1.40093 |
| C  | 2.66571  | -1.60235 | -0.86864 |
| N  | 1.96332  | -0.56400 | -0.36568 |
| Mn | 0.22899  | -0.62883 | 0.80624  |
| C  | -1.02412 | -0.50833 | 2.07014  |
| O  | -1.81926 | -0.53088 | 2.91722  |
| C  | 2.06461  | -2.97379 | -0.88057 |
| H  | -3.01005 | -0.31639 | -3.27048 |
| C  | -0.78985 | -1.77724 | -0.14219 |
| O  | -1.45412 | -2.58065 | -0.65125 |
| C  | 0.96711  | -1.81662 | 1.92796  |
| O  | 1.39903  | -2.60601 | 2.65922  |
| C  | -4.59061 | -1.66632 | -1.38573 |
| H  | 5.50402  | 0.02329  | -1.82712 |
| H  | 1.35820  | 5.15274  | 0.29249  |
| H  | 4.15759  | 1.93876  | -0.98931 |
| H  | 3.03009  | 3.37649  | -0.17796 |
| H  | -1.04538 | 4.49136  | 0.58252  |
| H  | 4.48905  | -2.26632 | -1.79578 |
| H  | -3.88191 | -0.10567 | 0.86569  |
| H  | -1.54547 | 1.76398  | -2.13752 |
| H  | -2.23748 | 1.60286  | 1.63279  |
| H  | -2.66569 | 2.95229  | 0.57571  |
| H  | 1.84766  | -3.33220 | 0.13442  |
| H  | 2.75113  | -3.68374 | -1.35849 |
| H  | 1.11911  | -2.97459 | -1.44054 |
| H  | -5.35107 | -1.44684 | -2.14480 |
| H  | -3.99795 | -2.53781 | -1.68905 |
| H  | -5.07476 | -1.86523 | -0.42361 |

**2<sub>C2</sub><sup>+</sup>(red1)**

Energy = -2367.960104  
 Enthalpy 0K = -2367.592890  
 Enthalpy 298K = -2367.565912  
 Free Energy 298K = -2367.649856  
 Nimag = 0 (28.5534 cm<sup>-1</sup>)

|    |          |          |          |
|----|----------|----------|----------|
| C  | 2.50922  | 0.46696  | 1.25589  |
| N  | 2.72793  | 0.57894  | -0.06395 |
| C  | 3.53450  | -0.46072 | -0.47894 |
| C  | 3.79297  | -1.22369 | 0.61154  |
| N  | 3.14180  | -0.63762 | 1.67254  |
| C  | 2.28041  | 1.63333  | -0.96868 |
| C  | 0.89230  | 2.17434  | -0.72207 |
| N  | -0.13474 | 1.34844  | -0.44693 |
| C  | -1.32525 | 1.89251  | -0.10789 |
| C  | -1.56159 | 3.26577  | -0.18790 |
| C  | -0.52468 | 4.10790  | -0.55844 |
| C  | 0.72965  | 3.55626  | -0.78526 |
| C  | -2.33886 | 0.95101  | 0.42308  |
| C  | -3.52509 | 1.39711  | 1.00347  |
| C  | -4.38071 | 0.46572  | 1.57533  |
| C  | -4.01053 | -0.87125 | 1.57035  |
| C  | -2.81291 | -1.26550 | 0.96669  |
| N  | -2.00561 | -0.35682 | 0.37738  |
| Mn | -0.38383 | -0.70700 | -0.89910 |
| C  | 0.77952  | -0.77438 | -2.25082 |
| O  | 1.48952  | -0.89452 | -3.16191 |
| C  | -2.41605 | -2.70908 | 0.99328  |
| C  | 3.10925  | -1.15827 | 3.03082  |
| C  | 0.51425  | -1.97277 | 0.02583  |
| O  | 1.06916  | -2.85598 | 0.53231  |
| C  | -1.35897 | -1.79893 | -1.93106 |
| O  | -1.95033 | -2.53391 | -2.60615 |
| H  | 4.36736  | -2.13821 | 0.72451  |
| H  | -5.31744 | 0.78433  | 2.03611  |
| H  | -0.68342 | 5.18483  | -0.63310 |
| H  | -3.77493 | 2.45617  | 1.02730  |
| H  | -2.54341 | 3.67644  | 0.04117  |
| H  | 1.58937  | 4.18963  | -1.00693 |
| H  | -4.64416 | -1.62802 | 2.03452  |
| H  | 3.84472  | -0.56523 | -1.51427 |
| C  | 1.70601  | 1.35343  | 2.13068  |
| H  | 2.35146  | 1.22756  | -1.98614 |
| H  | 2.99311  | 2.46632  | -0.90695 |
| H  | -2.32671 | -3.12396 | -0.01959 |
| H  | -3.16198 | -3.29663 | 1.54299  |
| H  | -1.44271 | -2.83276 | 1.48766  |
| H  | 3.57050  | -0.44077 | 3.72187  |
| H  | 2.07163  | -1.35101 | 3.33138  |
| H  | 3.67381  | -2.09604 | 3.05151  |
| H  | 2.12181  | 1.34996  | 3.14609  |
| H  | 1.70717  | 2.38433  | 1.75818  |
| H  | 0.66643  | 0.99418  | 2.17872  |

**2<sub>C5</sub><sup>+</sup>(red1)**

Energy = -2367.961478  
 Enthalpy 0K = -2367.594356  
 Enthalpy 298K = -2367.567309  
 Free Energy 298K = -2367.651065  
 Nimag = 0 (30.5702 cm<sup>-1</sup>)

|    |          |          |          |
|----|----------|----------|----------|
| N  | 2.08555  | -0.54108 | -0.40354 |
| C  | 2.59865  | 0.70791  | -0.44366 |
| C  | 3.86451  | 0.97465  | -0.96072 |
| C  | 4.60339  | -0.07584 | -1.48941 |
| C  | 4.04161  | -1.34434 | -1.51123 |
| C  | 2.77424  | -1.55892 | -0.96135 |
| C  | 1.68316  | 1.78366  | 0.00468  |
| N  | 0.42814  | 1.38972  | 0.30697  |
| C  | -0.51865 | 2.33146  | 0.49192  |
| C  | -0.21431 | 3.68837  | 0.49653  |
| C  | 1.10438  | 4.09152  | 0.30951  |
| C  | 2.06179  | 3.12843  | 0.03430  |
| C  | -1.95723 | 1.91082  | 0.65744  |
| N  | -2.41588 | 1.06716  | -0.44462 |
| C  | -1.98790 | 1.16210  | -1.75242 |
| C  | -2.66112 | 0.21676  | -2.45657 |
| N  | -3.49461 | -0.42830 | -1.57132 |
| C  | -3.33925 | 0.09865  | -0.35123 |
| C  | -4.36995 | -1.54422 | -1.89588 |
| Mn | 0.41661  | -0.64555 | 0.84583  |
| C  | 1.18952  | -1.89753 | 1.86776  |
| O  | 1.64904  | -2.71953 | 2.54445  |
| C  | 2.16560  | -2.92624 | -1.00655 |
| C  | -0.68476 | -0.48008 | 2.24254  |
| O  | -1.35914 | -0.44834 | 3.18767  |
| C  | -0.71440 | -1.73535 | -0.04291 |
| O  | -1.44453 | -2.50605 | -0.51189 |
| H  | -2.62289 | -0.05108 | -3.50842 |
| H  | 5.59856  | 0.10070  | -1.90153 |
| H  | 1.37353  | 5.14849  | 0.33989  |
| H  | 4.26605  | 1.98635  | -0.97061 |
| H  | 3.09062  | 3.42325  | -0.16604 |
| H  | -1.01012 | 4.41964  | 0.64254  |
| H  | 4.57711  | -2.18530 | -1.95360 |
| C  | -4.03335 | -0.36358 | 0.87216  |
| H  | -1.24522 | 1.88700  | -2.07163 |
| H  | -2.09332 | 1.36006  | 1.59362  |
| H  | -2.59187 | 2.80498  | 0.70168  |
| H  | 2.07033  | -3.35836 | -0.00079 |
| H  | 2.78797  | -3.59888 | -1.61011 |
| H  | 1.15940  | -2.88734 | -1.44587 |
| H  | -4.28081 | -1.74973 | -2.96764 |
| H  | -4.06536 | -2.43170 | -1.32720 |
| H  | -5.41046 | -1.28656 | -1.65990 |
| H  | -5.03403 | -0.73567 | 0.61894  |
| H  | -3.46762 | -1.18615 | 1.33639  |
| H  | -4.13818 | 0.44875  | 1.60083  |



**3<sub>c2</sub><sup>+</sup>(red1)**

Energy = -2446.528112  
 Enthalpy 0K = -2446.105402  
 Enthalpy 298K = -2446.074945  
 Free Energy 298K = -2446.167122  
 Nimag = 0 (22.9868 cm<sup>-1</sup>)

C -4.11928 -0.44884 -0.60762  
 N -2.91988 -0.29623 -0.02717  
 C -3.07131 0.25555 1.23905  
 C -4.41187 0.43751 1.41913  
 N -5.03707 -0.00641 0.25824  
 C -1.63690 -0.65905 -0.60549  
 C -0.82298 0.56182 -0.97634  
 N 0.48955 0.56644 -0.68163  
 C 1.20020 1.69724 -0.88449  
 C 0.64144 2.81882 -1.49691  
 C -0.69562 2.78735 -1.86745  
 C -1.44449 1.65441 -1.57523  
 C 2.56999 1.69364 -0.32027  
 N 2.94087 0.54773 0.29583  
 C 4.08406 0.52587 1.01271  
 C 4.92646 1.64159 1.04965  
 C 4.59089 2.78947 0.34705  
 C 3.38167 2.82510 -0.33625  
 Mn 1.72664 -1.06481 -0.25141  
 C 1.12271 -1.80550 1.28185  
 O 0.76279 -2.36022 2.23384  
 C 4.45195 -0.70151 1.78769  
 C -1.91342 0.54821 2.12540  
 C -5.17704 0.98497 2.56998  
 C -6.48001 0.00971 0.07956  
 C -4.33515 -1.01617 -1.96102  
 C 0.87014 -2.15931 -1.37936  
 O 0.34514 -2.90356 -2.09885  
 C 3.06738 -2.23247 -0.46834  
 O 3.87749 -3.04544 -0.63435  
 H 5.24899 3.66028 0.35260  
 H -1.15543 3.64764 -2.35639  
 H 3.07070 3.72989 -0.85604  
 H 1.23757 3.71261 -1.67389  
 H -2.50915 1.61434 -1.80949  
 H 5.84502 1.59278 1.63623  
 H -1.81480 -1.29002 -1.48538  
 H -1.08886 -1.26477 0.12431  
 H 3.56391 -1.17208 2.22937  
 H 5.15924 -0.44375 2.58671  
 H 4.93993 -1.44470 1.14018  
 H -4.49144 1.24335 3.38634  
 H -5.73026 1.89308 2.28523  
 H -5.90436 0.25122 2.94932  
 H -1.29613 -0.34840 2.28611  
 H -1.26700 1.32969 1.69672  
 H -2.27006 0.89797 3.10175  
 H -6.94634 -0.69732 0.77800  
 H -6.85818 1.02091 0.27415  
 H -6.73531 -0.27381 -0.94507

H -5.37528 -0.89694 -2.28044  
 H -3.68788 -0.50979 -2.69051  
 H -4.09156 -2.08916 -1.96641

**3<sub>c5</sub><sup>+</sup>(red1)**

Energy = -2446.528291  
 Enthalpy 0K = -2446.105970  
 Enthalpy 298K = -2446.075361  
 Free Energy 298K = -2446.167958  
 Nimag = 0 (24.5526 cm<sup>-1</sup>)

N 2.92743 0.56701 0.29714  
 C 2.54790 1.70231 -0.33280  
 C 3.35147 2.83921 -0.36308  
 C 4.56120 2.82030 0.32008  
 C 4.90487 1.68387 1.03734  
 C 4.07023 0.56193 1.01469  
 C 1.17789 1.68785 -0.89651  
 N 0.47738 0.55262 -0.68134  
 C -0.83508 0.53331 -0.97461  
 C -1.46776 1.61505 -1.58250  
 C -0.72879 2.75080 -1.88827  
 C 0.60900 2.79726 -1.52116  
 C -1.63690 -0.69291 -0.59616  
 N -2.92733 -0.34109 -0.02325  
 C -3.09240 0.19897 1.19361  
 N -4.39996 0.41056 1.36118  
 C -5.09319 -0.01030 0.23267  
 C -4.16125 -0.48326 -0.64732  
 C -2.01078 0.53577 2.15065  
 C -4.30805 -1.05334 -2.01285  
 C -6.57331 0.08909 0.13530  
 C -5.03279 0.98878 2.53528  
 Mn 1.73459 -1.06289 -0.24398  
 C 4.44511 -0.65311 1.80575  
 C 0.88119 -2.18684 -1.34497  
 O 0.36196 -2.95072 -2.04762  
 C 3.10401 -2.18996 -0.49105  
 O 3.93864 -2.97396 -0.67490  
 C 1.17342 -1.81881 1.29972  
 O 0.84981 -2.38650 2.25666  
 H 5.21350 3.69546 0.31412  
 H -1.19657 3.60178 -2.38586  
 H 3.03400 3.73498 -0.89442  
 H 1.19735 3.69386 -1.70992  
 H -2.53291 1.56306 -1.81338  
 H 5.82386 1.64909 1.62424  
 H -1.81999 -1.32226 -1.47594  
 H -1.08034 -1.30009 0.12562  
 H 3.56002 -1.11968 2.25721  
 H 5.15436 -0.38173 2.59850  
 H 4.93225 -1.40498 1.16773  
 H -4.26821 1.39208 3.20641  
 H -5.69705 1.80411 2.22316  
 H -5.61588 0.22125 3.06114  
 H -1.09143 -0.01093 1.90928  
 H -1.79204 1.61414 2.11433

|   |          |          |          |
|---|----------|----------|----------|
| H | -2.30523 | 0.27368  | 3.17514  |
| H | -7.06234 | -0.47085 | 0.94676  |
| H | -6.90661 | 1.13637  | 0.19943  |
| H | -6.91664 | -0.32278 | -0.82144 |
| H | -5.36055 | -1.01769 | -2.31957 |
| H | -3.71871 | -0.48420 | -2.74773 |
| H | -3.97752 | -2.10274 | -2.04751 |

### 1c2(red2)

|                  |   |                               |
|------------------|---|-------------------------------|
| Energy           | = | -2328.776748                  |
| Enthalpy 0K      | = | -2328.439436                  |
| Enthalpy 298K    | = | -2328.414192                  |
| Free Energy 298K | = | -2328.493569                  |
| Nimag            | = | 0 (28.9766 cm <sup>-1</sup> ) |

|    |          |          |          |
|----|----------|----------|----------|
| C  | -3.49661 | 1.53811  | 0.89867  |
| C  | -2.26426 | 1.06921  | 0.36890  |
| N  | -2.00042 | -0.27497 | 0.26864  |
| C  | -2.91291 | -1.15730 | 0.77566  |
| C  | -4.11545 | -0.73335 | 1.31611  |
| C  | -4.42337 | 0.64130  | 1.36086  |
| C  | -1.21947 | 1.93691  | -0.06721 |
| N  | -0.06199 | 1.31052  | -0.52326 |
| C  | 1.01917  | 2.13745  | -0.74291 |
| C  | 0.95284  | 3.50872  | -0.67621 |
| C  | -0.27526 | 4.14870  | -0.36652 |
| C  | -1.33760 | 3.35012  | -0.03893 |
| C  | 2.36949  | 1.53896  | -1.03681 |
| N  | 2.83309  | 0.63086  | 0.01696  |
| C  | 3.74734  | -0.38258 | -0.15573 |
| C  | 3.87284  | -1.01328 | 1.04371  |
| N  | 3.03208  | -0.37051 | 1.92350  |
| C  | 2.41420  | 0.61610  | 1.28017  |
| C  | 2.80349  | -0.75474 | 3.30738  |
| Mn | -0.26328 | -0.70563 | -0.78184 |
| C  | 0.46078  | -1.91676 | 0.31470  |
| O  | 0.97048  | -2.74856 | 0.95201  |
| C  | -2.60806 | -2.62758 | 0.77324  |
| C  | -1.17118 | -1.75911 | -1.89500 |
| O  | -1.73661 | -2.47353 | -2.62084 |
| C  | 1.06464  | -0.99045 | -1.92797 |
| O  | 1.87165  | -1.29933 | -2.71139 |
| H  | 4.47815  | -1.86340 | 1.34516  |
| H  | -5.37525 | 0.98485  | 1.77182  |
| H  | -0.35481 | 5.23686  | -0.35031 |
| H  | -3.70063 | 2.60711  | 0.94651  |
| H  | -2.28394 | 3.80413  | 0.25528  |
| H  | 1.85568  | 4.09551  | -0.85344 |
| H  | -4.81519 | -1.47329 | 1.70736  |
| H  | 4.22119  | -0.57212 | -1.11448 |
| H  | 1.67939  | 1.28822  | 1.71590  |
| H  | 2.37302  | 0.96993  | -1.97303 |
| H  | 3.10781  | 2.34424  | -1.13705 |
| H  | -2.50997 | -3.02613 | -0.24523 |
| H  | -3.41173 | -3.17848 | 1.27941  |
| H  | -1.66359 | -2.83465 | 1.29486  |
| H  | 2.15278  | -0.01038 | 3.77894  |

|   |         |          |         |
|---|---------|----------|---------|
| H | 2.31942 | -1.73901 | 3.33473 |
| H | 3.76252 | -0.79523 | 3.83789 |

### 1c5(red2)

|                  |   |                               |
|------------------|---|-------------------------------|
| Energy           | = | -2328.776760                  |
| Enthalpy 0K      | = | -2328.440115                  |
| Enthalpy 298K    | = | -2328.414634                  |
| Free Energy 298K | = | -2328.494936                  |
| Nimag            | = | 0 (22.9393 cm <sup>-1</sup> ) |

|    |          |          |          |
|----|----------|----------|----------|
| C  | 3.70092  | 1.11570  | -0.98199 |
| C  | 2.42487  | 0.81476  | -0.43445 |
| N  | 1.99169  | -0.48395 | -0.31476 |
| C  | 2.77683  | -1.48128 | -0.82142 |
| C  | 4.01744  | -1.22124 | -1.37896 |
| C  | 4.49939  | 0.10215  | -1.44259 |
| C  | 1.50315  | 1.81309  | -0.00167 |
| N  | 0.27246  | 1.34379  | 0.44823  |
| C  | -0.69919 | 2.29960  | 0.64594  |
| C  | -0.45403 | 3.65090  | 0.59133  |
| C  | 0.85303  | 4.12626  | 0.30706  |
| C  | 1.80535  | 3.19918  | -0.02047 |
| C  | -2.13012 | 1.87636  | 0.86505  |
| N  | -2.62788 | 1.04478  | -0.23470 |
| C  | -2.32235 | 1.20450  | -1.56594 |
| C  | -2.96321 | 0.21111  | -2.24129 |
| N  | -3.64702 | -0.53296 | -1.30754 |
| C  | -3.42559 | -0.01247 | -0.10439 |
| C  | -4.43491 | -1.72246 | -1.58960 |
| Mn | 0.23247  | -0.67140 | 0.76625  |
| C  | -0.67168 | -1.80650 | -0.27575 |
| O  | -1.29941 | -2.59300 | -0.86354 |
| C  | 2.28358  | -2.89922 | -0.79810 |
| C  | 1.00855  | -1.82918 | 1.87450  |
| O  | 1.48522  | -2.60592 | 2.59979  |
| C  | -1.07692 | -0.71731 | 1.96253  |
| O  | -1.89946 | -0.85488 | 2.77948  |
| H  | -2.98921 | -0.03241 | -3.29962 |
| H  | 5.48201  | 0.31594  | -1.86896 |
| H  | 1.07417  | 5.19485  | 0.30193  |
| H  | 4.03834  | 2.14949  | -1.04728 |
| H  | 2.80551  | 3.52763  | -0.30383 |
| H  | -1.27716 | 4.35006  | 0.74809  |
| H  | 4.61125  | -2.04891 | -1.76962 |
| H  | -1.67446 | 2.00282  | -1.91720 |
| H  | -3.81231 | -0.40347 | 0.83363  |
| H  | -2.27071 | 1.31112  | 1.79207  |
| H  | -2.76242 | 2.77090  | 0.92505  |
| H  | 2.16511  | -3.27693 | 0.22631  |
| H  | 2.99359  | -3.55289 | -1.32175 |
| H  | 1.30509  | -2.98378 | -1.29045 |
| H  | -4.84019 | -2.11012 | -0.64886 |
| H  | -5.25704 | -1.46453 | -2.26853 |
| H  | -3.78966 | -2.47982 | -2.05058 |

**2c2(red2)**

Energy = -2368.062360  
 Enthalpy 0K = -2367.697426  
 Enthalpy 298K = -2367.670578  
 Free Energy 298K = -2367.753327  
 Nimag = 0 (23.8714 cm<sup>-1</sup>)

|    |          |          |          |
|----|----------|----------|----------|
| C  | -3.54161 | 1.49157  | 0.93163  |
| C  | -2.32959 | 1.02415  | 0.35448  |
| N  | -2.04407 | -0.31964 | 0.29287  |
| C  | -2.91241 | -1.19685 | 0.87913  |
| C  | -4.09322 | -0.77365 | 1.46592  |
| C  | -4.42469 | 0.59722  | 1.47614  |
| C  | -1.32599 | 1.89127  | -0.16579 |
| N  | -0.16525 | 1.26965  | -0.61925 |
| C  | 0.89699  | 2.10138  | -0.88058 |
| C  | 0.79571  | 3.47290  | -0.90723 |
| C  | -0.44670 | 4.09952  | -0.62884 |
| C  | -1.48128 | 3.30080  | -0.22344 |
| C  | 2.27190  | 1.52833  | -1.12220 |
| N  | 2.75247  | 0.57549  | -0.11454 |
| C  | 3.60439  | -0.46002 | -0.43563 |
| C  | 3.84190  | -1.15394 | 0.70489  |
| N  | 3.13325  | -0.52906 | 1.70438  |
| C  | 2.48246  | 0.52854  | 1.19888  |
| C  | 3.05163  | -0.97956 | 3.08461  |
| Mn | -0.35878 | -0.75268 | -0.83405 |
| C  | 0.44799  | -1.93049 | 0.24146  |
| O  | 0.99085  | -2.75318 | 0.86265  |
| C  | -2.57847 | -2.66038 | 0.91256  |
| C  | -1.29124 | -1.87425 | -1.85355 |
| O  | -1.87343 | -2.63230 | -2.52012 |
| C  | 0.89167  | -0.98520 | -2.07477 |
| O  | 1.64833  | -1.23658 | -2.92575 |
| H  | 4.43962  | -2.04092 | 0.89258  |
| H  | -5.35873 | 0.93978  | 1.92704  |
| H  | -0.55510 | 5.18390  | -0.68686 |
| H  | -3.76031 | 2.55866  | 0.95488  |
| H  | -2.43416 | 3.74865  | 0.05924  |
| H  | 1.68413  | 4.07149  | -1.11449 |
| H  | -4.75724 | -1.51016 | 1.92077  |
| H  | 3.95388  | -0.61630 | -1.45152 |
| H  | 2.31967  | 1.00110  | -2.08248 |
| H  | 2.99282  | 2.35449  | -1.17275 |
| H  | -2.52607 | -3.09254 | -0.09558 |
| H  | -3.34246 | -3.20823 | 1.47983  |
| H  | -1.60312 | -2.83046 | 1.38880  |
| H  | 3.47086  | -0.22044 | 3.75809  |
| H  | 2.00568  | -1.17696 | 3.35132  |
| H  | 3.62979  | -1.90465 | 3.17765  |
| C  | 1.60832  | 1.41869  | 1.99944  |
| H  | 1.57499  | 2.42735  | 1.57464  |
| H  | 0.58537  | 1.01218  | 2.02008  |
| H  | 1.98242  | 1.48141  | 3.02898  |

**2c5(red2)**

Energy = -2368.063413  
 Enthalpy 0K = -2367.698588  
 Enthalpy 298K = -2367.671614  
 Free Energy 298K = -2367.754628  
 Nimag = 0 (27.3409 cm<sup>-1</sup>)

|    |          |          |          |
|----|----------|----------|----------|
| C  | -3.30223 | 0.07221  | -0.36609 |
| N  | -2.43183 | 1.09101  | -0.35455 |
| C  | -1.98775 | 1.31926  | -1.63921 |
| C  | -2.60117 | 0.41069  | -2.43990 |
| N  | -3.41416 | -0.35054 | -1.63206 |
| C  | -1.98270 | 1.84638  | 0.82146  |
| C  | -0.54641 | 2.28334  | 0.67454  |
| N  | 0.42465  | 1.32935  | 0.47960  |
| C  | 1.65880  | 1.79354  | 0.03965  |
| C  | 1.97482  | 3.17722  | 0.06173  |
| C  | 1.02632  | 4.10215  | 0.40722  |
| C  | -0.29179 | 3.63351  | 0.65660  |
| C  | 2.55763  | 0.79183  | -0.42895 |
| C  | 3.83076  | 1.08114  | -0.98835 |
| C  | 4.59465  | 0.06478  | -1.49958 |
| C  | 4.07916  | -1.24802 | -1.47702 |
| C  | 2.84480  | -1.49782 | -0.90098 |
| N  | 2.09853  | -0.50177 | -0.33827 |
| Mn | 0.37991  | -0.68393 | 0.80512  |
| C  | -0.81207 | -0.65350 | 2.12236  |
| O  | -1.53778 | -0.71612 | 3.03333  |
| C  | 2.30912  | -2.90029 | -0.91853 |
| C  | -4.22738 | -1.47502 | -2.06495 |
| C  | -0.63881 | -1.76920 | -0.18191 |
| O  | -1.33586 | -2.52982 | -0.72553 |
| C  | 1.16658  | -1.90824 | 1.83120  |
| O  | 1.65384  | -2.72171 | 2.50771  |
| H  | -2.53248 | 0.23898  | -3.51016 |
| H  | 5.57410  | 0.26936  | -1.93769 |
| H  | 1.25754  | 5.16835  | 0.43553  |
| H  | 4.18945  | 2.10940  | -1.02617 |
| H  | 2.98095  | 3.50366  | -0.20354 |
| H  | -1.11318 | 4.33606  | 0.80749  |
| H  | 4.64159  | -2.07444 | -1.91414 |
| H  | -1.27273 | 2.10292  | -1.87098 |
| C  | -4.00318 | -0.54576 | 0.78260  |
| H  | -2.13502 | 1.22231  | 1.70580  |
| H  | -2.62267 | 2.73190  | 0.92515  |
| H  | 2.24285  | -3.32696 | 0.09157  |
| H  | 2.96355  | -3.54697 | -1.51793 |
| H  | 1.29842  | -2.92860 | -1.34876 |
| H  | -3.87647 | -2.39379 | -1.57822 |
| H  | -5.28097 | -1.29726 | -1.81296 |
| H  | -4.12566 | -1.57614 | -3.15064 |
| H  | -5.05469 | -0.73114 | 0.52312  |
| H  | -3.53594 | -1.51157 | 1.02853  |
| H  | -3.97322 | 0.09774  | 1.66757  |

**3c2(red2)**

Energy = -2446.628428  
 Enthalpy 0K = -2446.208566  
 Enthalpy 298K = -2446.177877  
 Free Energy 298K = -2446.271086  
 Nimag = 0 (9.4427 cm<sup>-1</sup>)

|    |          |          |          |
|----|----------|----------|----------|
| N  | 2.98959  | 0.49178  | 0.23660  |
| C  | 2.57812  | 1.73480  | -0.20346 |
| C  | 3.43967  | 2.86278  | -0.13010 |
| C  | 4.66871  | 2.74355  | 0.46225  |
| C  | 5.03115  | 1.49688  | 1.02054  |
| C  | 4.18437  | 0.40947  | 0.89880  |
| C  | 1.24094  | 1.79994  | -0.68506 |
| N  | 0.53575  | 0.60644  | -0.63615 |
| C  | -0.81060 | 0.66927  | -0.86699 |
| C  | -1.44962 | 1.81227  | -1.29153 |
| C  | -0.70159 | 3.00256  | -1.48009 |
| C  | 0.62722  | 2.99320  | -1.15111 |
| C  | -1.61775 | -0.58364 | -0.59447 |
| N  | -2.93824 | -0.29460 | -0.05633 |
| C  | -4.10247 | -0.31754 | -0.71736 |
| N  | -5.06456 | -0.00945 | 0.15964  |
| C  | -4.50400 | 0.23077  | 1.40763  |
| C  | -3.15725 | 0.05081  | 1.27173  |
| C  | -4.30050 | -0.60161 | -2.15983 |
| C  | -2.04641 | 0.15822  | 2.25498  |
| C  | -5.32942 | 0.60114  | 2.58681  |
| C  | -6.48661 | 0.08003  | -0.12512 |
| Mn | 1.70436  | -1.03540 | -0.27607 |
| C  | 4.58365  | -0.89002 | 1.53714  |
| C  | 0.76075  | -2.11147 | -1.33491 |
| O  | 0.19741  | -2.85625 | -2.03222 |
| C  | 3.02325  | -2.14602 | -0.72688 |
| O  | 3.83463  | -2.91431 | -1.05662 |
| C  | 1.24103  | -1.84713 | 1.24805  |
| O  | 0.94650  | -2.45957 | 2.19332  |
| H  | 5.34284  | 3.60037  | 0.52929  |
| H  | -1.18508 | 3.91103  | -1.84428 |
| H  | 3.11383  | 3.82310  | -0.52988 |
| H  | 1.21625  | 3.90688  | -1.23413 |
| H  | -2.52589 | 1.80559  | -1.46991 |
| H  | 5.97463  | 1.38028  | 1.55630  |
| H  | -1.73611 | -1.19855 | -1.49465 |
| H  | -1.08842 | -1.20035 | 0.14073  |
| H  | 3.73658  | -1.34100 | 2.07320  |
| H  | 5.40728  | -0.72534 | 2.24482  |
| H  | 4.92512  | -1.62354 | 0.79350  |
| H  | -6.68744 | -0.30275 | -1.13060 |
| H  | -7.04213 | -0.52526 | 0.60207  |
| H  | -6.81627 | 1.12548  | -0.05935 |
| H  | -3.34273 | -0.60369 | -2.69121 |
| H  | -4.78359 | -1.58029 | -2.30015 |
| H  | -4.94112 | 0.16849  | -2.61139 |
| H  | -5.90423 | 1.52025  | 2.39641  |
| H  | -6.04365 | -0.19757 | 2.83988  |
| H  | -4.68454 | 0.77270  | 3.45736  |

|   |          |          |         |
|---|----------|----------|---------|
| H | -2.43718 | 0.47936  | 3.22830 |
| H | -1.53648 | -0.80795 | 2.39086 |
| H | -1.29249 | 0.89002  | 1.92634 |

**3c5(red2)**

Energy = -2446.628612  
 Enthalpy 0K = -2446.208935  
 Enthalpy 298K = -2446.178215  
 Free Energy 298K = -2446.271065  
 Nimag = 0 (15.5535 cm<sup>-1</sup>)

|    |          |          |          |
|----|----------|----------|----------|
| N  | 2.99890  | 0.52072  | 0.18805  |
| C  | 2.56427  | 1.72044  | -0.33980 |
| C  | 3.41066  | 2.86196  | -0.36463 |
| C  | 4.64938  | 2.80354  | 0.21670  |
| C  | 5.03787  | 1.60722  | 0.86073  |
| C  | 4.20503  | 0.50252  | 0.83371  |
| C  | 1.21926  | 1.73117  | -0.80384 |
| N  | 0.52986  | 0.53722  | -0.64550 |
| C  | -0.82151 | 0.56814  | -0.85053 |
| C  | -1.48229 | 1.66591  | -1.35480 |
| C  | -0.75131 | 2.84296  | -1.65909 |
| C  | 0.58354  | 2.87448  | -1.35668 |
| C  | -1.60896 | -0.66377 | -0.45242 |
| N  | -2.95175 | -0.34271 | 0.00773  |
| C  | -3.22698 | 0.23124  | 1.18634  |
| N  | -4.54944 | 0.41369  | 1.24318  |
| C  | -5.13844 | -0.05901 | 0.07709  |
| C  | -4.12607 | -0.53430 | -0.70841 |
| C  | -2.23596 | 0.62921  | 2.21543  |
| C  | -4.14585 | -1.14293 | -2.06520 |
| C  | -6.60742 | -0.00020 | -0.14352 |
| C  | -5.28559 | 1.01195  | 2.34356  |
| Mn | 1.72433  | -1.05682 | -0.18336 |
| C  | 4.63258  | -0.74102 | 1.55916  |
| C  | 0.76414  | -2.23332 | -1.11254 |
| O  | 0.19433  | -3.04476 | -1.72505 |
| C  | 3.05308  | -2.16724 | -0.60294 |
| O  | 3.87556  | -2.93565 | -0.90407 |
| C  | 1.33116  | -1.75645 | 1.41457  |
| O  | 1.08141  | -2.29629 | 2.41492  |
| H  | 5.31183  | 3.67199  | 0.20980  |
| H  | -1.25188 | 3.71232  | -2.08960 |
| H  | 3.06553  | 3.78518  | -0.83016 |
| H  | 1.16040  | 3.78344  | -1.52921 |
| H  | -2.56259 | 1.63420  | -1.50498 |
| H  | 5.99109  | 1.54369  | 1.38811  |
| H  | -1.70694 | -1.36855 | -1.28652 |
| H  | -1.07955 | -1.19465 | 0.34814  |
| H  | 3.80606  | -1.15114 | 2.15653  |
| H  | 5.47695  | -0.51748 | 2.22495  |
| H  | 4.95453  | -1.53008 | 0.86547  |
| H  | -4.58425 | 1.42398  | 3.07572  |
| H  | -5.91730 | 1.82296  | 1.95999  |
| H  | -5.91594 | 0.25427  | 2.82761  |
| H  | -1.26831 | 0.14654  | 2.03149  |
| H  | -2.08623 | 1.71957  | 2.19754  |

|   |          |          |          |
|---|----------|----------|----------|
| H | -2.58222 | 0.34142  | 3.21720  |
| H | -7.14932 | -0.54455 | 0.64483  |
| H | -6.96906 | 1.03967  | -0.14480 |
| H | -6.86166 | -0.45333 | -1.10945 |
| H | -5.16724 | -1.13139 | -2.46515 |
| H | -3.49992 | -0.58412 | -2.75938 |
| H | -3.79913 | -2.18747 | -2.04224 |

### 1c2(I1)

|                  |                                 |
|------------------|---------------------------------|
| Energy           | = -2517.168112                  |
| Enthalpy 0K      | = -2516.818696                  |
| Enthalpy 298K    | = -2516.789014                  |
| Free Energy 298K | = -2516.880196                  |
| Nimag            | = 0 (29.2092 cm <sup>-1</sup> ) |

|    |          |          |          |
|----|----------|----------|----------|
| N  | 1.75809  | -0.96954 | -0.40756 |
| C  | 2.14349  | 0.06945  | -1.21825 |
| C  | 3.33682  | -0.00191 | -1.98615 |
| C  | 4.10116  | -1.13834 | -1.95132 |
| C  | 3.66707  | -2.22152 | -1.16101 |
| C  | 2.50681  | -2.11233 | -0.41255 |
| C  | 1.26243  | 1.19059  | -1.24568 |
| N  | 0.11299  | 1.07752  | -0.46725 |
| C  | -0.83608 | 2.06003  | -0.65631 |
| C  | -0.62299 | 3.18423  | -1.41696 |
| C  | 0.62416  | 3.37898  | -2.06574 |
| C  | 1.53767  | 2.36153  | -1.99581 |
| C  | -2.19260 | 1.91692  | -0.01965 |
| N  | -2.87777 | 0.67829  | -0.40118 |
| C  | -3.85878 | 0.05813  | 0.33733  |
| C  | -4.19829 | -1.07940 | -0.32795 |
| N  | -3.41733 | -1.12857 | -1.46004 |
| C  | -2.62698 | -0.05867 | -1.48092 |
| C  | -3.40426 | -2.21396 | -2.42759 |
| Mn | 0.13463  | -0.51827 | 0.80539  |
| C  | -0.82631 | -2.00620 | 0.57625  |
| O  | -1.48839 | -2.96393 | 0.51565  |
| C  | 2.06126  | -3.29721 | 0.39476  |
| C  | 1.07731  | -0.93314 | 2.25834  |
| O  | 1.66737  | -1.21992 | 3.22086  |
| C  | -1.06856 | 0.02845  | 1.99359  |
| O  | -1.80354 | 0.28488  | 2.86165  |
| H  | -2.13127 | 1.92466  | 1.07414  |
| H  | -2.82654 | 2.75992  | -0.32151 |
| H  | 3.63771  | 0.83992  | -2.60859 |
| H  | -1.42406 | 3.91769  | -1.52250 |
| H  | -1.89108 | 0.16486  | -2.24880 |
| H  | 2.48618  | 2.44917  | -2.52589 |
| H  | 0.82667  | 4.28752  | -2.63524 |
| H  | 4.23497  | -3.15254 | -1.13283 |
| H  | 5.02078  | -1.21012 | -2.53626 |
| H  | -4.91903 | -1.85736 | -0.09327 |
| H  | -4.22136 | 0.47379  | 1.27277  |
| H  | -4.42790 | -2.40775 | -2.77007 |
| H  | -2.99078 | -3.11456 | -1.95626 |
| H  | -2.78003 | -1.92353 | -3.27943 |
| H  | 2.74870  | -4.13880 | 0.23765  |

|   |         |          |         |
|---|---------|----------|---------|
| H | 2.03140 | -3.07439 | 1.46945 |
| H | 1.05127 | -3.61580 | 0.10225 |
| C | 1.35834 | 2.66881  | 1.92226 |
| O | 0.30128 | 3.03652  | 2.22607 |
| O | 2.43912 | 2.35041  | 1.64978 |

### 1c2(TS1)

|                  |                                   |
|------------------|-----------------------------------|
| Energy           | = -2517.154875                    |
| Enthalpy 0K      | = -2516.805718                    |
| Enthalpy 298K    | = -2516.777167                    |
| Free Energy 298K | = -2516.864212                    |
| Nimag            | = 0 (-626.5560 cm <sup>-1</sup> ) |

|    |          |          |          |
|----|----------|----------|----------|
| N  | 1.82425  | -0.54511 | -0.66166 |
| C  | 2.07984  | 0.71362  | -1.10214 |
| C  | 3.20685  | 1.01490  | -1.89245 |
| C  | 4.06725  | 0.00413  | -2.25399 |
| C  | 3.77115  | -1.30087 | -1.84378 |
| C  | 2.65241  | -1.55370 | -1.06242 |
| C  | 1.09262  | 1.70923  | -0.73974 |
| N  | 0.02119  | 1.24283  | -0.01694 |
| C  | -1.00177 | 2.14190  | 0.18786  |
| C  | -0.91007 | 3.47456  | -0.16035 |
| C  | 0.24847  | 3.97098  | -0.77623 |
| C  | 1.23274  | 3.06205  | -1.09264 |
| C  | -2.30234 | 1.68086  | 0.78378  |
| N  | -2.95877 | 0.64497  | -0.02145 |
| C  | -3.88441 | -0.25753 | 0.44958  |
| C  | -4.23201 | -1.05358 | -0.59818 |
| N  | -3.51223 | -0.61865 | -1.68728 |
| C  | -2.75034 | 0.40555  | -1.31465 |
| C  | -3.52873 | -1.22751 | -3.00793 |
| Mn | 0.23099  | -0.65786 | 0.64582  |
| C  | -0.66650 | -1.88219 | -0.27297 |
| O  | -1.27340 | -2.73752 | -0.78026 |
| C  | 2.35767  | -2.97402 | -0.67827 |
| C  | 1.13111  | -1.66245 | 1.80103  |
| O  | 1.67003  | -2.33083 | 2.58901  |
| C  | -1.01447 | -0.73014 | 1.91330  |
| O  | -1.75898 | -0.91419 | 2.78620  |
| H  | -2.17331 | 1.27680  | 1.79299  |
| H  | -2.98893 | 2.53347  | 0.85588  |
| H  | 3.39505  | 2.03500  | -2.22277 |
| H  | -1.75812 | 4.13189  | 0.03860  |
| H  | -2.06266 | 0.94468  | -1.96134 |
| H  | 2.12560  | 3.39480  | -1.62004 |
| H  | 0.34475  | 5.02667  | -1.03334 |
| H  | 4.41101  | -2.13390 | -2.13857 |
| H  | 4.94954  | 0.21198  | -2.86267 |
| H  | -4.92108 | -1.89095 | -0.66219 |
| H  | -4.20791 | -0.25966 | 1.48618  |
| H  | -2.93088 | -0.61291 | -3.68962 |
| H  | -4.56232 | -1.28202 | -3.37045 |
| H  | -3.09994 | -2.23559 | -2.94732 |
| H  | 3.02641  | -3.65336 | -1.22278 |
| H  | 2.50579  | -3.14628 | 0.39591  |
| H  | 1.31976  | -3.24427 | -0.91189 |

C 1.46607 0.96522 2.29454  
 O 0.72436 1.19283 3.20533  
 O 2.53028 1.19917 1.80386

**1c2(TS1)'**

Energy = -2517.151635  
 Enthalpy 0K = -2516.803310  
 Enthalpy 298K = -2516.774425  
 Free Energy 298K = -2516.862820  
 Nimag = 1 (-510.9166 cm<sup>-1</sup>)

C 4.22133 -0.40381 -1.28892  
 N 3.12916 0.34544 -0.91493  
 C 3.19834 0.57744 0.39298  
 N 4.29467 -0.00234 0.87260  
 C 4.95490 -0.62318 -0.16408  
 C 2.04825 0.75342 -1.82210  
 C 1.01164 1.61814 -1.15993  
 N -0.13060 1.04779 -0.64059  
 C -1.10579 1.93153 -0.22848  
 C -0.87877 3.31835 -0.15085  
 C 0.31543 3.85705 -0.57003  
 C 1.25679 2.97482 -1.12938  
 C -2.38068 1.34040 0.09630  
 C -3.49673 2.10200 0.50496  
 C -4.70453 1.47796 0.70482  
 C -4.79396 0.10053 0.45518  
 C -3.67142 -0.61405 0.06675  
 N -2.45290 -0.00962 -0.06641  
 Mn -0.62367 -0.89634 -0.38449  
 C -1.02050 -1.70175 -1.91732  
 O -1.22369 -2.30380 -2.89063  
 C -3.82406 -2.07711 -0.23230  
 C 4.70123 -0.02072 2.26927  
 C 0.98254 -1.66774 -0.41153  
 O 1.94470 -2.31756 -0.38529  
 C 0.12080 -0.08048 2.09820  
 C -0.96781 -2.20383 0.77242  
 O -1.13736 -3.09039 1.50858  
 H 1.59251 -0.15361 -2.23916  
 H 2.52070 1.31049 -2.64080  
 H -3.40672 3.17669 0.65550  
 H 2.18961 3.35077 -1.55459  
 H 2.47280 1.13256 0.97960  
 H -1.66064 3.97237 0.23340  
 H 0.50706 4.92952 -0.51432  
 H -5.74688 -0.42138 0.55508  
 H -5.58103 2.04512 1.02488  
 H 5.88449 -1.16403 -0.00976  
 H 4.37353 -0.72102 -2.31664  
 H 5.73010 0.34951 2.35442  
 H 4.64161 -1.04723 2.65227  
 H 4.02781 0.62422 2.84328  
 H -4.88927 -2.33393 -0.30224  
 H -3.33504 -2.34289 -1.17855  
 H -3.37981 -2.70472 0.55187  
 O 1.16662 -0.59453 2.35187

O -0.75443 0.65417 2.42141

**1c2(I2)**

Energy = -2517.164641  
 Enthalpy 0K = -2516.812806  
 Enthalpy 298K = -2516.784558  
 Free Energy 298K = -2516.871612  
 Nimag = 0 (18.6514 cm<sup>-1</sup>)

C -3.03467 0.15586 -0.58831  
 N -3.23005 0.30077 0.72489  
 C -4.53921 -0.00697 1.02787  
 C -5.14354 -0.34242 -0.14457  
 N -4.18588 -0.23456 -1.13033  
 C -2.18888 0.64117 1.69483  
 C -1.17821 1.58196 1.09018  
 N -0.00496 1.11661 0.62613  
 C 0.87198 2.00678 0.11590  
 C 0.57324 3.36580 0.00117  
 C -0.65315 3.83612 0.44450  
 C -1.53294 2.92909 1.01443  
 C 2.20519 1.47763 -0.25029  
 N 2.42845 0.18557 0.06709  
 C 3.67361 -0.30891 -0.06469  
 C 4.70045 0.45989 -0.62628  
 C 4.44807 1.75527 -1.04629  
 C 3.18164 2.28367 -0.83182  
 C 3.99675 -1.69415 0.40732  
 Mn 0.64191 -0.90592 0.41130  
 C 0.36270 -0.58118 -1.69335  
 O -0.66515 0.05794 -2.06888  
 C -4.37284 -0.51620 -2.54498  
 C 1.22651 -2.51316 -0.09371  
 O 1.48360 -3.58848 -0.43198  
 C 0.90676 -1.16537 2.18652  
 O 1.01784 -1.42906 3.30715  
 C -0.90673 -1.76832 0.34666  
 O -1.84724 -2.44630 0.27116  
 O 1.26762 -0.96749 -2.45078  
 H -1.71170 -0.27433 2.06178  
 H -2.68750 1.13324 2.53825  
 H 2.96560 3.31200 -1.11513  
 H -2.50123 3.24785 1.40409  
 H -2.05108 0.24218 -1.13748  
 H 1.29789 4.06012 -0.42001  
 H -0.90727 4.89424 0.36380  
 H 5.69464 0.02182 -0.72757  
 H 5.23097 2.35885 -1.50919  
 H -6.16586 -0.63946 -0.36188  
 H -4.92378 0.04512 2.04271  
 H -5.05490 0.22135 -2.98717  
 H -4.78870 -1.52429 -2.66475  
 H -3.39467 -0.46129 -3.03666  
 H 5.06674 -1.76542 0.64469  
 H 3.41453 -1.95910 1.29878  
 H 3.78200 -2.43579 -0.37494

**1c5(I1)**

Energy = -2517.168195  
 Enthalpy 0K = -2516.818797  
 Enthalpy 298K = -2516.789040  
 Free Energy 298K = -2516.880902  
 Nimag = 0 (17.4349 cm<sup>-1</sup>)

C -2.55443 0.67872 -1.92485  
 N -2.69327 1.05710 -0.61005  
 C -3.58076 0.25472 -0.02739  
 N -4.01939 -0.62310 -0.92462  
 C -3.38858 -0.37895 -2.12282  
 C -1.95730 2.13568 0.05654  
 C -0.53257 2.22864 -0.42654  
 N 0.28578 1.12361 -0.34866  
 C 1.48801 1.21024 -1.04418  
 C 1.95449 2.44508 -1.56200  
 C 1.17377 3.56827 -1.49812  
 C -0.13627 3.42679 -0.96944  
 C 2.21952 -0.00710 -1.16740  
 N 1.66593 -1.09718 -0.54131  
 C 2.25963 -2.31595 -0.70867  
 C 3.43074 -2.46390 -1.43307  
 C 4.03848 -1.33984 -2.02850  
 C 3.42938 -0.11885 -1.90358  
 Mn 0.06662 -0.61788 0.69140  
 C -1.07078 -0.04680 1.92776  
 O -1.79011 0.22523 2.80560  
 C 1.62320 -3.53854 -0.11359  
 H -3.58496 -0.97828 -3.00732  
 C -1.08147 -1.91290 0.25072  
 O -1.86653 -2.75564 0.06936  
 C 0.88341 -1.37565 2.08039  
 O 1.39068 -1.88428 2.99714  
 C 1.76734 2.16022 2.22214  
 O 2.78432 1.67758 1.94467  
 O 0.78075 2.68152 2.53730  
 H -2.02622 1.96055 1.13514  
 H -2.47180 3.08042 -0.15952  
 H 3.86369 0.75977 -2.37945  
 H -0.84176 4.25880 -1.00163  
 H -1.87358 1.18599 -2.60277  
 H 2.94449 2.49785 -2.01545  
 H 1.52368 4.52657 -1.88558  
 H 3.87086 -3.45649 -1.53964  
 H 4.96738 -1.44459 -2.59353  
 C -4.96524 -1.69956 -0.67440  
 H -3.87807 0.29364 1.01792  
 H 2.19368 -4.43412 -0.39285  
 H 1.58045 -3.48717 0.98249  
 H 0.59154 -3.65804 -0.47252  
 H -5.82960 -1.58861 -1.34074  
 H -4.47116 -2.66143 -0.85671  
 H -5.29377 -1.64799 0.36911

**1c5(TS1)**

Energy = -2517.154633  
 Enthalpy 0K = -2516.805419  
 Enthalpy 298K = -2516.776851  
 Free Energy 298K = -2516.863927  
 Nimag = 1 (-647.2741 cm<sup>-1</sup>)

C -2.65456 1.05327 -1.64673  
 N -2.79602 1.00625 -0.27888  
 C -3.63348 0.01853 0.02895  
 N -4.03402 -0.56903 -1.09462  
 C -3.43209 0.06039 -2.15936  
 C -2.12773 1.88783 0.68487  
 C -0.73908 2.25048 0.23282  
 N 0.19104 1.26209 0.00562  
 C 1.33567 1.65362 -0.64326  
 C 1.64444 3.00431 -0.87727  
 C 0.75647 3.99301 -0.51796  
 C -0.48173 3.58709 0.00286  
 C 2.21887 0.57924 -1.04721  
 N 1.82064 -0.66700 -0.68398  
 C 2.54989 -1.73471 -1.12168  
 C 3.70761 -1.56033 -1.86709  
 C 4.14543 -0.27441 -2.20388  
 C 3.38671 0.80123 -1.80304  
 Mn 0.18157 -0.68114 0.56902  
 C -1.09720 -0.67786 1.79928  
 O -1.89205 -0.81670 2.63763  
 C 2.10134 -3.13380 -0.81690  
 H -3.60383 -0.25471 -3.18466  
 C -0.81410 -1.75136 -0.43665  
 O -1.50159 -2.50812 -0.99541  
 C 0.93625 -1.83042 1.69337  
 O 1.37774 -2.58982 2.45951  
 C 1.52892 0.72510 2.34506  
 O 2.62344 0.87125 1.89000  
 O 0.78585 0.97970 3.24648  
 H -2.14243 1.38973 1.65882  
 H -2.72595 2.80295 0.77419  
 H 3.68336 1.81171 -2.07920  
 H -1.26187 4.32102 0.21219  
 H -2.01280 1.77996 -2.13720  
 H 2.59394 3.27136 -1.33920  
 H 0.98415 5.04773 -0.67822  
 H 4.26538 -2.43951 -2.19312  
 H 5.05636 -0.12955 -2.78812  
 C -4.90792 -1.72846 -1.18357  
 H -3.92483 -0.27335 1.03488  
 H 2.70658 -3.85173 -1.38556  
 H 2.20875 -3.37325 0.24938  
 H 1.04561 -3.28133 -1.07892  
 H -5.73110 -1.51049 -1.87452  
 H -4.33177 -2.58865 -1.54652  
 H -5.30981 -1.94645 -0.18820

**1c5 (I2)**

Energy = -2517.160459  
 Enthalpy 0K = -2516.807781  
 Enthalpy 298K = -2516.779579  
 Free Energy 298K = -2516.866053  
 Nimag = 0 (25.4905 cm<sup>-1</sup>)

|    |          |          |          |
|----|----------|----------|----------|
| N  | 2.56296  | 0.21788  | 0.17485  |
| C  | 2.32852  | 1.52474  | -0.06276 |
| C  | 3.34188  | 2.41420  | -0.41742 |
| C  | 4.64708  | 1.94809  | -0.49681 |
| C  | 4.89402  | 0.62295  | -0.17629 |
| C  | 3.83456  | -0.22619 | 0.16438  |
| C  | 0.93389  | 1.97375  | 0.14546  |
| N  | 0.05817  | 1.02320  | 0.53965  |
| C  | -1.18047 | 1.41289  | 0.88419  |
| C  | -1.60907 | 2.73601  | 0.77307  |
| C  | -0.73449 | 3.69860  | 0.29494  |
| C  | 0.56307  | 3.31031  | -0.00524 |
| C  | -2.16963 | 0.41324  | 1.42853  |
| N  | -3.26309 | 0.18432  | 0.48375  |
| C  | -4.54763 | 0.06928  | 0.82140  |
| N  | -5.25720 | -0.14441 | -0.28101 |
| C  | -4.39777 | -0.16441 | -1.35954 |
| C  | -3.13764 | 0.04144  | -0.88390 |
| H  | -4.94763 | 0.14611  | 1.82978  |
| C  | -6.70036 | -0.31800 | -0.34556 |
| Mn | 0.79818  | -0.94995 | 0.26019  |
| C  | 1.47180  | -2.45098 | -0.41850 |
| O  | 1.79754  | -3.45584 | -0.89360 |
| C  | 4.14852  | -1.64499 | 0.53285  |
| C  | 0.96176  | -1.38866 | 2.00815  |
| O  | 1.01942  | -1.78382 | 3.09560  |
| C  | -0.71350 | -1.85140 | 0.02588  |
| O  | -1.62745 | -2.54276 | -0.15898 |
| C  | 0.61013  | -0.43522 | -1.83066 |
| O  | 1.63165  | -0.54749 | -2.52985 |
| O  | -0.49730 | 0.02158  | -2.21343 |
| H  | -4.75947 | -0.32534 | -2.37136 |
| H  | -1.67992 | -0.53461 | 1.66987  |
| H  | -2.61799 | 0.81017  | 2.34780  |
| H  | 3.12595  | 3.46047  | -0.62515 |
| H  | -2.62899 | 2.99364  | 1.06491  |
| H  | 1.28163  | 4.05138  | -0.34927 |
| H  | -1.04613 | 4.73811  | 0.18111  |
| H  | 5.91011  | 0.22543  | -0.18297 |
| H  | 5.46050  | 2.61859  | -0.78022 |
| H  | 5.19398  | -1.72292 | 0.85987  |
| H  | 3.49407  | -2.00493 | 1.33644  |
| H  | 4.02098  | -2.31249 | -0.33104 |
| H  | -2.14928 | 0.07318  | -1.38677 |
| H  | -7.13216 | 0.45695  | -0.99099 |
| H  | -6.93065 | -1.31030 | -0.75315 |
| H  | -7.11437 | -0.22874 | 0.66471  |

**2c2 (I1)**

Energy = -2556.453689  
 Enthalpy 0K = -2556.076653  
 Enthalpy 298K = -2556.045368  
 Free Energy 298K = -2556.139892  
 Nimag = 0 (25.8999 cm<sup>-1</sup>)

|    |          |          |          |
|----|----------|----------|----------|
| C  | -2.76619 | -0.00578 | -1.27092 |
| N  | -2.79263 | 0.78591  | -0.18789 |
| C  | -3.68056 | 0.26388  | 0.72847  |
| C  | -4.18895 | -0.87357 | 0.19371  |
| N  | -3.60569 | -1.02596 | -1.04248 |
| C  | -2.03963 | 2.01863  | 0.07307  |
| C  | -0.67563 | 2.09962  | -0.56411 |
| N  | 0.22139  | 1.07004  | -0.40896 |
| C  | 1.34510  | 1.11669  | -1.22979 |
| C  | 1.67969  | 2.28784  | -1.95683 |
| C  | 0.83720  | 3.36690  | -1.96407 |
| C  | -0.40820 | 3.23159  | -1.29687 |
| C  | 2.13565  | -0.06768 | -1.26282 |
| N  | 1.72074  | -1.08192 | -0.43288 |
| C  | 2.37591  | -2.27892 | -0.48983 |
| C  | 3.47351  | -2.47265 | -1.31210 |
| C  | 3.93987  | -1.41969 | -2.12603 |
| C  | 3.26803  | -0.22603 | -2.10697 |
| Mn | 0.22612  | -0.50577 | 0.88611  |
| C  | -0.81615 | 0.19512  | 2.14305  |
| O  | -1.44473 | 0.57230  | 3.04962  |
| C  | 1.89221  | -3.42926 | 0.34484  |
| C  | -3.82623 | -2.14616 | -1.94300 |
| C  | -0.86499 | -1.91426 | 0.75262  |
| O  | -1.59177 | -2.82546 | 0.76177  |
| C  | 1.22527  | -1.00255 | 2.27287  |
| O  | 1.85571  | -1.33876 | 3.19318  |
| C  | 1.78017  | 2.59892  | 1.84421  |
| O  | 2.80892  | 2.14783  | 1.55749  |
| O  | 0.78102  | 3.09541  | 2.15991  |
| H  | -1.96880 | 2.10649  | 1.16397  |
| H  | -2.64498 | 2.86285  | -0.28121 |
| H  | 3.59038  | 0.59398  | -2.74802 |
| H  | -1.16918 | 4.00940  | -1.37857 |
| C  | -1.95960 | 0.13617  | -2.50657 |
| H  | 2.61785  | 2.32692  | -2.51087 |
| H  | 1.08732  | 4.27901  | -2.50869 |
| H  | 3.96676  | -3.44567 | -1.32407 |
| H  | 4.80966  | -1.56004 | -2.77171 |
| H  | -4.90245 | -1.59240 | 0.58537  |
| H  | -3.85927 | 0.74230  | 1.68635  |
| H  | -4.49474 | -2.85846 | -1.44781 |
| H  | -2.87197 | -2.63957 | -2.16648 |
| H  | -4.29273 | -1.79930 | -2.87452 |
| H  | 2.48778  | -4.32654 | 0.13108  |
| H  | 1.96792  | -3.21568 | 1.41947  |
| H  | 0.83778  | -3.65351 | 0.13323  |
| H  | -2.50614 | -0.28584 | -3.35937 |
| H  | -1.73798 | 1.18774  | -2.71578 |
| H  | -1.00894 | -0.40732 | -2.39303 |



**2c2(TS1)**

Energy = -2556.440262  
 Enthalpy 0K = -2556.063442  
 Enthalpy 298K = -2556.033315  
 Free Energy 298K = -2556.122987  
 Nimag = 1 (-623.5763 cm<sup>-1</sup>)

|    |          |          |          |
|----|----------|----------|----------|
| C  | -2.86322 | 0.40146  | -1.10706 |
| N  | -2.88067 | 0.59484  | 0.22134  |
| C  | -3.69736 | -0.35215 | 0.80237  |
| C  | -4.16679 | -1.14366 | -0.19345 |
| N  | -3.63445 | -0.66379 | -1.36718 |
| C  | -2.19822 | 1.62623  | 1.01419  |
| C  | -0.88386 | 2.10819  | 0.45877  |
| N  | 0.11195  | 1.21652  | 0.13660  |
| C  | 1.14899  | 1.72181  | -0.61030 |
| C  | 1.31895  | 3.09937  | -0.82578 |
| C  | 0.39213  | 3.99672  | -0.34447 |
| C  | -0.75718 | 3.46909  | 0.26379  |
| C  | 2.07027  | 0.73733  | -1.13435 |
| N  | 1.82688  | -0.54450 | -0.75550 |
| C  | 2.59599  | -1.53657 | -1.29258 |
| C  | 3.64086  | -1.25032 | -2.15969 |
| C  | 3.92011  | 0.07386  | -2.51904 |
| C  | 3.12012  | 1.07193  | -2.01296 |
| Mn | 0.34462  | -0.71495 | 0.66790  |
| C  | -0.78250 | -0.80157 | 2.04076  |
| O  | -1.44546 | -0.98272 | 2.97717  |
| C  | 2.31349  | -2.97360 | -0.96596 |
| C  | -3.82977 | -1.25755 | -2.68078 |
| C  | -0.64468 | -1.87166 | -0.24450 |
| O  | -1.29763 | -2.68943 | -0.75577 |
| C  | 1.30603  | -1.80993 | 1.68331  |
| O  | 1.88927  | -2.53642 | 2.38364  |
| C  | 1.76930  | 0.77731  | 2.30918  |
| O  | 2.77951  | 1.03139  | 1.72393  |
| O  | 1.13330  | 0.94787  | 3.30762  |
| H  | -2.08224 | 1.21098  | 2.02178  |
| H  | -2.87712 | 2.48447  | 1.09681  |
| H  | 3.29140  | 2.10811  | -2.30058 |
| H  | -1.57841 | 4.12514  | 0.55732  |
| C  | -2.12163 | 1.15603  | -2.14568 |
| H  | 2.19342  | 3.45962  | -1.36606 |
| H  | 0.51674  | 5.07172  | -0.48183 |
| H  | 4.23458  | -2.07176 | -2.56339 |
| H  | 4.74099  | 0.30619  | -3.20045 |
| H  | -4.82332 | -2.00842 | -0.17107 |
| H  | -3.86360 | -0.38335 | 1.87445  |
| H  | -4.44178 | -2.15791 | -2.56222 |
| H  | -2.86006 | -1.53295 | -3.11393 |
| H  | -4.34729 | -0.55189 | -3.34386 |
| H  | 2.93246  | -3.62717 | -1.59428 |
| H  | 2.53665  | -3.20515 | 0.08382  |
| H  | 1.25808  | -3.22277 | -1.13729 |
| H  | -2.66395 | 1.10779  | -3.09807 |
| H  | -2.00222 | 2.20743  | -1.86483 |
| H  | -1.12390 | 0.71257  | -2.28771 |

**2c2(I2)**

Energy = -2556.449107  
 Enthalpy 0K = -2556.068997  
 Enthalpy 298K = -2556.039210  
 Free Energy 298K = -2556.128958  
 Nimag = 0 (21.7307 cm<sup>-1</sup>)

|    |          |          |          |
|----|----------|----------|----------|
| Mn | 1.31594  | -0.97036 | -0.40568 |
| N  | 0.01926  | 0.71691  | -0.57390 |
| C  | 0.07088  | 3.09244  | -0.94056 |
| H  | 0.62821  | 4.02697  | -0.93615 |
| N  | 2.53340  | 0.64578  | 0.32381  |
| C  | -1.25627 | 3.08161  | -1.34067 |
| H  | -1.74685 | 3.99943  | -1.66902 |
| C  | 2.78812  | 3.03348  | 0.18457  |
| H  | 2.38207  | 4.00319  | -0.09634 |
| C  | 2.05685  | 1.86098  | -0.01284 |
| C  | 0.67442  | 1.89685  | -0.54593 |
| C  | 4.51602  | 1.70460  | 1.14494  |
| H  | 5.48918  | 1.59663  | 1.62610  |
| C  | -1.95185 | 1.88253  | -1.28619 |
| H  | -3.00917 | 1.84337  | -1.55107 |
| C  | -1.29126 | 0.72187  | -0.88482 |
| C  | 4.04623  | 2.95144  | 0.76326  |
| H  | 4.64218  | 3.85124  | 0.92727  |
| C  | 3.74007  | 0.56214  | 0.91875  |
| O  | -0.28257 | -3.08333 | -1.66033 |
| O  | 2.66072  | -3.43409 | 0.43194  |
| O  | 2.75849  | -0.68891 | -2.97786 |
| N  | -3.45817 | -0.35627 | -0.41537 |
| C  | 2.20293  | -2.41254 | 0.12535  |
| C  | 4.25169  | -0.76842 | 1.36768  |
| H  | 3.46457  | -1.25179 | 1.96315  |
| H  | 4.49667  | -1.40681 | 0.50682  |
| H  | 5.15968  | -0.64510 | 1.97239  |
| C  | 0.28140  | -2.20786 | -1.15030 |
| C  | -2.05656 | -0.57551 | -0.75277 |
| H  | -2.04125 | -1.13640 | -1.69548 |
| H  | -1.59005 | -1.17918 | 0.04989  |
| C  | 2.15842  | -0.73221 | -1.98960 |
| C  | -4.52626 | -0.51325 | -1.27240 |
| N  | -5.23886 | 0.14169  | 0.70315  |
| C  | -5.64569 | -0.20254 | -0.56833 |
| C  | -3.90583 | 0.04163  | 0.78588  |
| C  | -3.06704 | 0.35923  | 1.96246  |
| H  | -2.21067 | -0.33750 | 2.02511  |
| H  | -2.67573 | 1.38560  | 1.87159  |
| H  | -3.66034 | 0.29648  | 2.88291  |
| C  | -6.12074 | 0.54998  | 1.78675  |
| H  | -7.14436 | 0.58882  | 1.39972  |
| H  | -6.07013 | -0.17633 | 2.60830  |
| H  | -5.83180 | 1.54387  | 2.15099  |
| C  | 0.53780  | -1.24215 | 1.56888  |
| O  | -0.65592 | -1.65139 | 1.65168  |
| O  | 1.25607  | -0.92375 | 2.53126  |
| H  | -6.69333 | -0.19954 | -0.85516 |
| H  | -4.39118 | -0.83480 | -2.30113 |

**2c5(I1)**

Energy = -2556.454623  
 Enthalpy 0K = -2556.077535  
 Enthalpy 298K = -2556.046235  
 Free Energy 298K = -2556.140577  
 Nimag = 0 (26.1289 cm<sup>-1</sup>)

C -2.30577 0.62947 -2.06080  
 N -2.54833 1.00322 -0.75627  
 C -3.49230 0.20460 -0.24040  
 N -3.84905 -0.66829 -1.19146  
 C -3.11955 -0.42288 -2.33191  
 C -1.84682 2.09267 -0.06685  
 C -0.41216 2.19453 -0.52059  
 N 0.40682 1.09780 -0.39087  
 C 1.59859 1.13735 -1.10461  
 C 2.07487 2.34852 -1.66937  
 C 1.30268 3.47952 -1.64063  
 C -0.01155 3.36785 -1.11139  
 C 2.29649 -0.10104 -1.19694  
 N 1.72246 -1.15243 -0.52190  
 C 2.26282 -2.39681 -0.67429  
 C 3.40984 -2.60765 -1.42148  
 C 4.04841 -1.52112 -2.05495  
 C 3.48681 -0.27520 -1.95166  
 Mn 0.20184 -0.56997 0.76131  
 C -0.76372 0.17899 2.05132  
 O -1.34640 0.59537 2.97148  
 C 1.58770 -3.57527 -0.03466  
 H -3.24528 -1.01609 -3.23301  
 C -1.05847 -1.79614 0.45852  
 O -1.90639 -2.59424 0.38075  
 C 1.03323 -1.34782 2.12984  
 O 1.55504 -1.85929 3.03681  
 C 2.12373 2.19272 2.03741  
 O 3.07779 1.57564 1.80674  
 O 1.20379 2.84681 2.30181  
 H -1.92523 1.92167 1.01011  
 H -2.36674 3.03246 -0.29325  
 H 3.94019 0.57546 -2.46022  
 H -0.71566 4.19824 -1.18697  
 H -1.57412 1.13968 -2.68023  
 H 3.06255 2.37457 -2.13089  
 H 1.65955 4.42039 -2.06318  
 H 3.80767 -3.61921 -1.51570  
 H 4.96131 -1.67519 -2.63465  
 C -4.81382 -1.74053 -1.01255  
 C -4.05198 0.20940 1.13006  
 H 2.08250 -4.50662 -0.34034  
 H 1.61570 -3.51798 1.06191  
 H 0.53005 -3.62701 -0.32869  
 H -4.92367 -2.26878 -1.96548  
 H -4.45099 -2.43845 -0.24723  
 H -5.78477 -1.32636 -0.71144  
 H -5.14963 0.17270 1.08403  
 H -3.70232 -0.67912 1.67718  
 H -3.75556 1.10544 1.68379

**2c5(TS1)**

Energy = -2556.440515  
 Enthalpy 0K = -2556.063336  
 Enthalpy 298K = -2556.033258  
 Free Energy 298K = -2556.123600  
 Nimag = 1 (-644.6951 cm<sup>-1</sup>)

C -2.33766 1.10681 -1.75879  
 N -2.63336 1.03952 -0.41324  
 C -3.55347 0.08564 -0.21494  
 N -3.83749 -0.45758 -1.40541  
 C -3.09058 0.16314 -2.37936  
 C -2.01183 1.88259 0.61757  
 C -0.60421 2.25350 0.23125  
 N 0.32213 1.26020 0.01298  
 C 1.45774 1.63319 -0.65907  
 C 1.78526 2.98066 -0.88660  
 C 0.91769 3.97883 -0.50275  
 C -0.32889 3.58783 0.01349  
 C 2.30165 0.53998 -1.09224  
 N 1.87708 -0.69707 -0.72454  
 C 2.55299 -1.78267 -1.20167  
 C 3.69175 -1.63734 -1.98144  
 C 4.16353 -0.36173 -2.31459  
 C 3.45281 0.73358 -1.88013  
 Mn 0.31479 -0.66465 0.61907  
 C -0.84226 -0.55887 1.96495  
 O -1.53381 -0.61241 2.89685  
 C 2.05516 -3.16753 -0.90937  
 H -3.15919 -0.12201 -3.42513  
 C -0.79190 -1.72678 -0.27184  
 O -1.54965 -2.47778 -0.74113  
 C 1.10752 -1.83416 1.69541  
 O 1.58363 -2.60395 2.42956  
 C 1.83652 0.70232 2.29732  
 O 2.88763 0.83334 1.74410  
 O 1.19242 0.96388 3.27049  
 H -2.05869 1.35010 1.57024  
 H -2.61165 2.79592 0.71936  
 H 3.77246 1.73821 -2.15304  
 H -1.10233 4.33041 0.21747  
 H -1.61596 1.81322 -2.15774  
 H 2.73157 3.23583 -1.36227  
 H 1.16141 5.03160 -0.65238  
 H 4.20703 -2.53020 -2.33883  
 H 5.06110 -0.24043 -2.92436  
 C -4.74776 -1.57161 -1.61252  
 C -4.16084 -0.35072 1.06260  
 H 2.62619 -3.90098 -1.49340  
 H 2.15922 -3.42638 0.15252  
 H 0.99206 -3.26814 -1.16603  
 H -4.77902 -1.79764 -2.68357  
 H -4.38769 -2.45146 -1.06416  
 H -5.75497 -1.30428 -1.26711  
 H -5.24853 -0.44971 0.94008  
 H -3.75789 -1.33253 1.35304  
 H -3.96442 0.36460 1.86741

**2c5(I2)**

Energy = -2556.446064  
 Enthalpy 0K = -2556.066085  
 Enthalpy 298K = -2556.036026  
 Free Energy 298K = -2556.126995  
 Nimag = 0 (20.6786 cm<sup>-1</sup>)

|    |          |          |          |
|----|----------|----------|----------|
| N  | 2.71788  | 0.21530  | 0.19318  |
| C  | 2.49195  | 1.52507  | -0.04469 |
| C  | 3.51186  | 2.40937  | -0.39364 |
| C  | 4.81614  | 1.93929  | -0.46241 |
| C  | 5.05515  | 0.61482  | -0.13373 |
| C  | 3.99032  | -0.23011 | 0.19971  |
| C  | 1.09754  | 1.98063  | 0.14676  |
| N  | 0.20708  | 1.03123  | 0.50426  |
| C  | -1.04041 | 1.42099  | 0.81224  |
| C  | -1.45589 | 2.74958  | 0.72102  |
| C  | -0.55871 | 3.71694  | 0.29682  |
| C  | 0.74203  | 3.32443  | 0.01941  |
| C  | -2.06647 | 0.41570  | 1.27079  |
| N  | -3.08148 | 0.20496  | 0.23986  |
| C  | -4.38521 | -0.00176 | 0.47857  |
| N  | -4.98809 | -0.15997 | -0.70434 |
| C  | -4.04703 | -0.05156 | -1.70894 |
| C  | -2.84331 | 0.17506  | -1.12095 |
| C  | -5.02727 | -0.03925 | 1.81328  |
| C  | -6.40972 | -0.39527 | -0.91097 |
| Mn | 0.95106  | -0.94764 | 0.26292  |
| C  | 1.63205  | -2.51622 | -0.23634 |
| O  | 1.94973  | -3.57505 | -0.57975 |
| C  | 4.29822  | -1.64429 | 0.58758  |
| C  | 0.97739  | -1.32175 | 2.03227  |
| O  | 0.92565  | -1.66574 | 3.13741  |
| C  | -0.55236 | -1.80779 | -0.11766 |
| O  | -1.46447 | -2.47143 | -0.39705 |
| C  | 0.88395  | -0.48676 | -1.85015 |
| H  | -4.31962 | -0.15502 | -2.75529 |
| H  | -1.59945 | -0.53748 | 1.53748  |
| H  | -2.57270 | 0.80868  | 2.16088  |
| H  | 3.30094  | 3.45560  | -0.60631 |
| H  | -2.48427 | 3.00642  | 0.98229  |
| H  | -1.82323 | 0.26895  | -1.54030 |
| H  | 1.47454  | 4.06770  | -0.28816 |
| H  | -0.85806 | 4.76201  | 0.20228  |
| H  | 6.07002  | 0.21418  | -0.12769 |
| H  | 5.63394  | 2.60597  | -0.74204 |
| H  | 5.34508  | -1.72334 | 0.90968  |
| H  | 3.64676  | -1.98365 | 1.40335  |
| H  | 4.16047  | -2.32540 | -0.26364 |
| H  | -6.99275 | 0.45945  | -0.54475 |
| H  | -6.58230 | -0.51729 | -1.98549 |
| H  | -6.72058 | -1.30957 | -0.38983 |
| H  | -6.09569 | -0.26374 | 1.72215  |
| H  | -4.55732 | -0.80941 | 2.44169  |
| H  | -4.91570 | 0.93212  | 2.31814  |
| O  | 1.85878  | -0.85552 | -2.52711 |
| O  | -0.08663 | 0.19668  | -2.26251 |

**3c2(I1)**

Energy = -2635.019744  
 Enthalpy 0K = -2634.586570  
 Enthalpy 298K = -2634.551818  
 Free Energy 298K = -2634.654908  
 Nimag = 0 (11.1764 cm<sup>-1</sup>)

|    |          |          |          |
|----|----------|----------|----------|
| C  | 3.68010  | 0.01936  | -1.49924 |
| N  | 3.10601  | -0.27630 | -0.26909 |
| C  | 4.05382  | -0.30845 | 0.67735  |
| N  | 5.22288  | -0.05698 | 0.08015  |
| C  | 5.02091  | 0.15718  | -1.27743 |
| C  | 1.68592  | -0.50498 | -0.06035 |
| C  | 0.88308  | 0.76145  | 0.12269  |
| N  | -0.48121 | 0.64186  | 0.00908  |
| C  | -1.20657 | 1.82910  | 0.01869  |
| C  | -0.58893 | 3.07056  | 0.31804  |
| C  | 0.76181  | 3.14134  | 0.52447  |
| C  | 1.52073  | 1.95044  | 0.38263  |
| Mn | -1.63592 | -1.03888 | -0.14111 |
| C  | -1.74286 | -1.99943 | -1.64329 |
| O  | -1.78498 | -2.70298 | -2.57041 |
| C  | -2.59119 | 1.70890  | -0.29497 |
| N  | -3.03170 | 0.43494  | -0.56477 |
| C  | -4.32203 | 0.26880  | -0.98432 |
| C  | -5.20421 | 1.33241  | -1.07293 |
| C  | -4.77878 | 2.63320  | -0.73198 |
| C  | -3.47547 | 2.82007  | -0.35480 |
| C  | -4.80309 | -1.09658 | -1.38373 |
| C  | 3.84882  | -0.55060 | 2.12613  |
| C  | 6.14268  | 0.46442  | -2.20311 |
| C  | 6.51903  | 0.00816  | 0.73356  |
| C  | 2.87529  | 0.12899  | -2.74457 |
| C  | -2.80531 | -1.87327 | 0.90994  |
| O  | -3.55452 | -2.44666 | 1.59376  |
| C  | -0.51477 | -2.26001 | 0.50483  |
| O  | 0.10179  | -3.15184 | 0.93271  |
| C  | -0.72426 | 0.21059  | 3.08366  |
| O  | -1.75447 | 0.73622  | 3.14750  |
| O  | 0.31544  | -0.30421 | 3.08238  |
| H  | -1.19457 | 3.97507  | 0.37471  |
| H  | 1.25033  | 4.08880  | 0.75891  |
| H  | -3.11534 | 3.81857  | -0.10971 |
| H  | -6.22576 | 1.15204  | -1.41096 |
| H  | 2.60668  | 1.98565  | 0.46780  |
| H  | -5.47140 | 3.47625  | -0.78370 |
| H  | -4.79015 | -1.79909 | -0.53991 |
| H  | -4.16543 | -1.52442 | -2.16956 |
| H  | -5.83129 | -1.03734 | -1.76442 |
| H  | 1.29988  | -1.06061 | -0.92585 |
| H  | 1.57825  | -1.16393 | 0.80752  |
| H  | 2.78699  | -0.47957 | 2.38545  |
| H  | 4.39502  | 0.19879  | 2.71496  |
| H  | 4.21518  | -1.54914 | 2.40852  |
| H  | 7.23923  | -0.60020 | 0.17283  |
| H  | 6.44009  | -0.38632 | 1.75143  |
| H  | 6.86859  | 1.04868  | 0.76987  |

|   |         |          |          |
|---|---------|----------|----------|
| H | 2.08187 | 0.88432  | -2.63790 |
| H | 2.39727 | -0.83021 | -2.99689 |
| H | 3.51938 | 0.42101  | -3.58313 |
| H | 6.86300 | -0.36717 | -2.24585 |
| H | 6.68638 | 1.36632  | -1.88330 |
| H | 5.75763 | 0.63582  | -3.21581 |

### 3c2(TS1)

|                  |                                   |
|------------------|-----------------------------------|
| Energy           | = -2635.008310                    |
| Enthalpy 0K      | = -2634.576062                    |
| Enthalpy 298K    | = -2634.542188                    |
| Free Energy 298K | = -2634.641953                    |
| Nimag            | = 1 (-645.7324 cm <sup>-1</sup> ) |

|    |          |          |          |
|----|----------|----------|----------|
| C  | 3.90737  | -0.02285 | -1.34928 |
| N  | 3.14600  | -0.24229 | -0.20781 |
| C  | 3.93478  | -0.22396 | 0.87572  |
| N  | 5.18457  | -0.00876 | 0.45338  |
| C  | 5.19918  | 0.12125  | -0.92954 |
| C  | 1.70769  | -0.44074 | -0.19913 |
| C  | 0.91248  | 0.83399  | -0.08735 |
| N  | -0.45699 | 0.70884  | -0.12238 |
| C  | -1.17390 | 1.88021  | -0.05037 |
| C  | -0.55716 | 3.13473  | 0.11243  |
| C  | 0.81202  | 3.23087  | 0.17841  |
| C  | 1.55489  | 2.04365  | 0.06180  |
| Mn | -1.59409 | -0.97637 | -0.20843 |
| C  | -1.93892 | -1.58999 | -1.83805 |
| O  | -2.15960 | -2.07412 | -2.87317 |
| C  | -2.60975 | 1.74159  | -0.14918 |
| N  | -3.06631 | 0.47201  | -0.31240 |
| C  | -4.40667 | 0.28410  | -0.49983 |
| C  | -5.29687 | 1.34778  | -0.46869 |
| C  | -4.83429 | 2.65232  | -0.25628 |
| C  | -3.48193 | 2.84978  | -0.10814 |
| C  | -4.95288 | -1.08943 | -0.76031 |
| C  | 3.50521  | -0.37331 | 2.28792  |
| C  | 6.45723  | 0.36313  | -1.68327 |
| C  | 6.36940  | 0.07300  | 1.28983  |
| C  | 3.30563  | 0.02277  | -2.70818 |
| C  | -2.54829 | -2.03847 | 0.84746  |
| O  | -3.12411 | -2.78985 | 1.52856  |
| C  | -0.40566 | -2.29317 | -0.06043 |
| O  | 0.22983  | -3.26281 | 0.02753  |
| C  | -1.03784 | -0.29486 | 2.30650  |
| O  | -1.86586 | 0.49832  | 2.62101  |
| O  | -0.04911 | -0.89839 | 2.59976  |
| H  | -1.16638 | 4.03437  | 0.18391  |
| H  | 1.30882  | 4.19380  | 0.30509  |
| H  | -3.09131 | 3.85564  | 0.03475  |
| H  | -6.36009 | 1.15383  | -0.61778 |
| H  | 2.64389  | 2.08311  | 0.08527  |
| H  | -5.52938 | 3.49375  | -0.22467 |
| H  | -4.86568 | -1.73602 | 0.12261  |
| H  | -4.41872 | -1.58595 | -1.58066 |
| H  | -6.01584 | -1.02289 | -1.02632 |
| H  | 1.43326  | -0.97352 | -1.11946 |

|   |         |          |          |
|---|---------|----------|----------|
| H | 1.46169 | -1.09849 | 0.64051  |
| H | 2.41538 | -0.46465 | 2.36299  |
| H | 3.81820 | 0.50571  | 2.86962  |
| H | 3.96455 | -1.26587 | 2.73744  |
| H | 7.06944 | -0.72735 | 1.01703  |
| H | 6.08756 | -0.03880 | 2.34132  |
| H | 6.85418 | 1.04740  | 1.14737  |
| H | 2.49917 | 0.77012  | -2.75756 |
| H | 2.88208 | -0.95316 | -2.99178 |
| H | 4.06985 | 0.29140  | -3.44772 |
| H | 7.17495 | -0.45760 | -1.53129 |
| H | 6.94086 | 1.29773  | -1.36031 |
| H | 6.24536 | 0.43865  | -2.75677 |

### 3c2(I2)

|                  |                                 |
|------------------|---------------------------------|
| Energy           | = -2635.016323                  |
| Enthalpy 0K      | = -2634.581320                  |
| Enthalpy 298K    | = -2634.547722                  |
| Free Energy 298K | = -2634.646834                  |
| Nimag            | = 0 (17.2966 cm <sup>-1</sup> ) |

|    |          |          |          |
|----|----------|----------|----------|
| C  | 4.07482  | -0.19048 | -1.18283 |
| N  | 3.13524  | -0.24652 | -0.16000 |
| C  | 3.73916  | -0.06611 | 1.02400  |
| N  | 5.04380  | 0.09942  | 0.78112  |
| C  | 5.28406  | 0.02345  | -0.58499 |
| C  | 1.70819  | -0.44050 | -0.34779 |
| C  | 0.92661  | 0.84990  | -0.40090 |
| N  | -0.42155 | 0.76159  | -0.32998 |
| C  | -1.12609 | 1.91227  | -0.24613 |
| C  | -0.51248 | 3.16882  | -0.29622 |
| C  | 0.86124  | 3.25235  | -0.42609 |
| C  | 1.59037  | 2.07028  | -0.46757 |
| Mn | -1.59974 | -0.98322 | -0.22381 |
| C  | -2.15980 | -1.23648 | -1.91478 |
| O  | -2.56243 | -1.50528 | -2.96884 |
| C  | -2.59108 | 1.78374  | -0.09958 |
| N  | -3.08332 | 0.52985  | -0.07901 |
| C  | -4.42060 | 0.35580  | -0.00086 |
| C  | -5.28737 | 1.44687  | 0.10566  |
| C  | -4.78234 | 2.73870  | 0.11519  |
| C  | -3.41314 | 2.91058  | -0.00124 |
| C  | -5.01511 | -1.01999 | -0.02891 |
| C  | 3.08330  | -0.00188 | 2.35254  |
| C  | 6.65135  | 0.15980  | -1.15228 |
| C  | 6.07809  | 0.32965  | 1.77458  |
| C  | 3.70236  | -0.34334 | -2.61455 |
| C  | -2.43137 | -2.25345 | 0.68713  |
| O  | -2.87077 | -3.14415 | 1.29398  |
| C  | -0.42673 | -2.28963 | -0.49383 |
| O  | 0.20595  | -3.24036 | -0.70035 |
| C  | -1.01515 | -0.67493 | 1.85900  |
| O  | -1.73660 | 0.06315  | 2.53445  |
| O  | 0.09223  | -1.17619 | 2.16730  |
| H  | -1.10261 | 4.08033  | -0.23573 |
| H  | 1.36051  | 4.22101  | -0.47988 |
| H  | -2.99612 | 3.91506  | -0.01456 |

|   |          |          |          |
|---|----------|----------|----------|
| H | -6.36082 | 1.26599  | 0.17648  |
| H | 2.67725  | 2.09950  | -0.54391 |
| H | -5.44626 | 3.60104  | 0.19968  |
| H | -4.83301 | -1.54365 | 0.91953  |
| H | -4.58374 | -1.62831 | -0.83377 |
| H | -6.10102 | -0.95536 | -0.17509 |
| H | 1.56686  | -1.01415 | -1.27112 |
| H | 1.31443  | -1.02771 | 0.49534  |
| H | 2.02993  | -0.32149 | 2.30536  |
| H | 3.12296  | 1.02978  | 2.73519  |
| H | 3.61013  | -0.65058 | 3.06664  |
| H | 6.78919  | -0.50693 | 1.77108  |
| H | 5.62543  | 0.41511  | 2.76713  |
| H | 6.60894  | 1.26162  | 1.54171  |
| H | 2.93145  | 0.38732  | -2.90295 |
| H | 3.31109  | -1.35118 | -2.82273 |
| H | 4.58207  | -0.18137 | -3.24950 |
| H | 7.32430  | -0.61548 | -0.75509 |
| H | 7.08749  | 1.14085  | -0.90912 |
| H | 6.61894  | 0.05877  | -2.24398 |

### 3<sub>C5</sub>(I1)

|                  |   |                               |
|------------------|---|-------------------------------|
| Energy           | = | -2635.020085                  |
| Enthalpy 0K      | = | -2634.587681                  |
| Enthalpy 298K    | = | -2634.552665                  |
| Free Energy 298K | = | -2634.657149                  |
| Nimag            | = | 0 (14.2625 cm <sup>-1</sup> ) |

|    |          |          |          |
|----|----------|----------|----------|
| Mn | -1.63122 | -1.00134 | 0.33487  |
| N  | -0.46020 | 0.59027  | -0.17754 |
| C  | -0.55048 | 2.88551  | -1.02654 |
| H  | -1.14768 | 3.76438  | -1.27022 |
| N  | -2.98256 | 0.56136  | 0.51778  |
| C  | 0.78929  | 2.87192  | -1.30696 |
| H  | 1.27649  | 3.72406  | -1.78423 |
| C  | -3.39454 | 2.87211  | -0.13380 |
| H  | -3.02633 | 3.79630  | -0.57814 |
| C  | -2.53572 | 1.74567  | -0.01978 |
| C  | -1.16822 | 1.76288  | -0.41835 |
| C  | -5.11261 | 1.59714  | 0.93454  |
| H  | -6.11988 | 1.51238  | 1.34512  |
| C  | 1.54028  | 1.73257  | -0.91661 |
| H  | 2.62232  | 1.71780  | -1.05218 |
| C  | 0.89926  | 0.65195  | -0.35984 |
| C  | -4.68055 | 2.79693  | 0.33165  |
| H  | -5.35354 | 3.65379  | 0.25424  |
| C  | -4.25443 | 0.51340  | 1.01595  |
| O  | 0.06435  | -3.28444 | -0.41065 |
| O  | -3.64261 | -2.65589 | -1.03999 |
| O  | -1.71657 | -2.20067 | 3.02694  |
| N  | 3.10898  | -0.25580 | 0.30517  |
| C  | -2.85403 | -1.98757 | -0.50234 |
| C  | -4.74028 | -0.73673 | 1.69115  |
| H  | -4.78154 | -1.58798 | 0.99861  |
| H  | -4.07366 | -1.02347 | 2.51607  |
| H  | -5.74780 | -0.57773 | 2.09765  |
| C  | -0.54093 | -2.33133 | -0.12271 |

|   |          |          |          |
|---|----------|----------|----------|
| C | 1.69821  | -0.54538 | 0.09993  |
| H | 1.27359  | -0.93586 | 1.03494  |
| H | 1.64100  | -1.35654 | -0.63393 |
| C | -1.69839 | -1.67385 | 1.98823  |
| C | 3.88093  | -1.29374 | -1.86091 |
| H | 3.49292  | -2.30920 | -1.68624 |
| H | 3.15004  | -0.75269 | -2.48041 |
| H | 4.81570  | -1.37906 | -2.42849 |
| C | 4.12972  | -0.57965 | -0.58045 |
| N | 4.93567  | 0.48820  | 1.17776  |
| C | 5.28664  | -0.11102 | -0.02497 |
| C | 3.61555  | 0.39383  | 1.36165  |
| C | 6.69541  | -0.16306 | -0.49635 |
| H | 7.33543  | -0.69673 | 0.22284  |
| H | 6.75180  | -0.68559 | -1.45910 |
| H | 7.10832  | 0.84879  | -0.62879 |
| C | 2.85374  | 0.94260  | 2.50943  |
| H | 2.92709  | 2.04014  | 2.52182  |
| H | 1.79479  | 0.66964  | 2.44229  |
| H | 3.25480  | 0.55748  | 3.45762  |
| C | 5.88381  | 1.11279  | 2.08363  |
| H | 5.34748  | 1.57534  | 2.91802  |
| H | 6.57860  | 0.35715  | 2.47308  |
| H | 6.44769  | 1.88648  | 1.54713  |
| C | -0.87033 | -0.41209 | -3.11574 |
| O | 0.15786  | -0.94588 | -3.06028 |
| O | -1.89234 | 0.12150  | -3.23434 |

### 3<sub>C5</sub>(TS1)

|                  |   |                                 |
|------------------|---|---------------------------------|
| Energy           | = | -2635.007844                    |
| Enthalpy 0K      | = | -2634.575623                    |
| Enthalpy 298K    | = | -2634.541740                    |
| Free Energy 298K | = | -2634.641306                    |
| Nimag            | = | 1 (-708.5915 cm <sup>-1</sup> ) |

|    |          |          |          |
|----|----------|----------|----------|
| Mn | -1.58309 | -0.96793 | 0.23574  |
| N  | -0.44132 | 0.69876  | -0.00150 |
| C  | -0.53792 | 3.09653  | -0.42277 |
| H  | -1.14416 | 3.99432  | -0.53264 |
| N  | -3.03029 | 0.50253  | 0.36418  |
| C  | 0.82704  | 3.16929  | -0.57507 |
| H  | 1.32238  | 4.11140  | -0.81433 |
| C  | -3.44899 | 2.85907  | -0.00524 |
| H  | -3.06395 | 3.84558  | -0.25755 |
| C  | -2.58145 | 1.75062  | 0.07163  |
| C  | -1.15189 | 1.86744  | -0.12395 |
| C  | -5.24147 | 1.40842  | 0.59704  |
| H  | -6.29283 | 1.23720  | 0.83303  |
| C  | 1.56748  | 1.99126  | -0.38855 |
| H  | 2.65419  | 2.01534  | -0.47241 |
| C  | 0.92481  | 0.80612  | -0.09897 |
| C  | -4.79034 | 2.68592  | 0.24488  |
| H  | -5.48371 | 3.52735  | 0.18693  |
| C  | -4.35470 | 0.34271  | 0.65787  |
| O  | 0.21036  | -3.26634 | -0.09995 |
| O  | -3.27061 | -2.83463 | -1.28371 |
| O  | -1.92702 | -1.95874 | 2.97840  |

|   |          |          |          |
|---|----------|----------|----------|
| N | 3.15317  | -0.24810 | 0.18958  |
| C | -2.62961 | -2.06255 | -0.68851 |
| C | -4.88360 | -0.99898 | 1.07312  |
| H | -4.87174 | -1.71689 | 0.24253  |
| H | -4.28494 | -1.43166 | 1.88509  |
| H | -5.92087 | -0.89951 | 1.41856  |
| C | -0.41653 | -2.29523 | 0.02358  |
| C | 1.71758  | -0.45772 | 0.11143  |
| H | 1.37957  | -0.96021 | 1.02725  |
| H | 1.53355  | -1.14749 | -0.71986 |
| C | -1.79296 | -1.51059 | 1.91192  |
| C | 3.55711  | -0.72314 | -2.25211 |
| H | 3.17775  | -1.75638 | -2.27906 |
| H | 2.74845  | -0.05747 | -2.58877 |
| H | 4.38605  | -0.64585 | -2.96619 |
| C | 4.02351  | -0.35414 | -0.88916 |
| N | 5.12024  | 0.21403  | 0.94263  |
| C | 5.26928  | -0.06299 | -0.41046 |
| C | 3.83464  | 0.10176  | 1.28932  |
| C | 6.59518  | -0.01742 | -1.08088 |
| H | 7.28994  | -0.74679 | -0.63683 |
| H | 6.48747  | -0.25164 | -2.14704 |
| H | 7.05126  | 0.98032  | -0.99107 |
| C | 3.27228  | 0.35362  | 2.63800  |
| H | 3.45206  | 1.39767  | 2.93346  |
| H | 2.19213  | 0.17344  | 2.65058  |
| H | 3.74593  | -0.30341 | 3.38151  |
| C | 6.21689  | 0.57155  | 1.82592  |
| H | 5.83568  | 0.74346  | 2.83729  |
| H | 6.95120  | -0.24409 | 1.85054  |
| H | 6.69955  | 1.48764  | 1.46169  |
| C | -1.21715 | -0.42245 | -2.33491 |
| O | -0.26824 | -1.05964 | -2.68245 |
| O | -2.04893 | 0.37947  | -2.62542 |

### 3c5(I2)

|                  |                                 |
|------------------|---------------------------------|
| Energy           | = -2635.013039                  |
| Enthalpy 0K      | = -2634.577850                  |
| Enthalpy 298K    | = -2634.544187                  |
| Free Energy 298K | = -2634.643137                  |
| Nimag            | = 0 (18.7926 cm <sup>-1</sup> ) |

|    |          |          |          |
|----|----------|----------|----------|
| Mn | -1.59403 | -0.95862 | 0.27241  |
| N  | -0.42089 | 0.77735  | 0.11277  |
| C  | -0.52030 | 3.11915  | -0.45166 |
| H  | -1.11883 | 4.00106  | -0.66922 |
| N  | -3.08540 | 0.53856  | 0.13962  |
| C  | 0.85856  | 3.19956  | -0.49017 |
| H  | 1.35880  | 4.13878  | -0.73150 |
| C  | -3.43196 | 2.89326  | -0.21466 |
| H  | -3.01769 | 3.88470  | -0.38505 |
| C  | -2.60065 | 1.77580  | -0.08343 |
| C  | -1.13224 | 1.89881  | -0.14508 |
| C  | -5.29715 | 1.45578  | 0.13786  |
| H  | -6.36948 | 1.28477  | 0.24269  |
| C  | 1.59246  | 2.04979  | -0.21894 |
| H  | 2.68118  | 2.07920  | -0.25124 |

|   |          |          |          |
|---|----------|----------|----------|
| C | 0.92917  | 0.86398  | 0.07250  |
| C | -4.80259 | 2.72808  | -0.11467 |
| H | -5.47543 | 3.58155  | -0.21725 |
| C | -4.42148 | 0.37558  | 0.27099  |
| O | 0.22292  | -3.22700 | 0.64666  |
| O | -3.04288 | -3.13784 | -1.05142 |
| O | -2.26164 | -1.34554 | 3.12417  |
| N | 3.14182  | -0.24117 | 0.22492  |
| C | -2.52101 | -2.24405 | -0.51756 |
| C | -5.00269 | -0.97432 | 0.57043  |
| H | -4.93983 | -1.63494 | -0.30474 |
| H | -4.47403 | -1.46777 | 1.39550  |
| H | -6.06190 | -0.87305 | 0.83989  |
| C | -0.41550 | -2.27272 | 0.47868  |
| C | 1.70239  | -0.40999 | 0.30501  |
| H | 1.44606  | -0.84117 | 1.28039  |
| H | 1.39646  | -1.11654 | -0.47857 |
| C | -1.98529 | -1.12521 | 2.01829  |
| C | 3.29025  | -0.93595 | -2.19852 |
| H | 3.08338  | -2.01580 | -2.13456 |
| H | 2.33473  | -0.44331 | -2.42959 |
| H | 3.98767  | -0.77085 | -3.02950 |
| C | 3.88883  | -0.43671 | -0.93122 |
| N | 5.18132  | 0.24926  | 0.72575  |
| C | 5.18048  | -0.12666 | -0.61156 |
| C | 3.94060  | 0.17854  | 1.21628  |
| C | 6.42531  | -0.15593 | -1.42343 |
| H | 7.14509  | -0.88603 | -1.02211 |
| H | 6.19242  | -0.43830 | -2.45757 |
| H | 6.91558  | 0.82938  | -1.43591 |
| C | 3.52490  | 0.55105  | 2.58960  |
| H | 3.72679  | 1.61729  | 2.76918  |
| H | 2.45386  | 0.37316  | 2.73446  |
| H | 4.08094  | -0.03671 | 3.33406  |
| C | 6.36386  | 0.67841  | 1.45232  |
| H | 6.11704  | 0.81617  | 2.50978  |
| H | 7.14600  | -0.08606 | 1.36333  |
| H | 6.73004  | 1.62702  | 1.03788  |
| C | -1.11440 | -0.78199 | -1.87754 |
| O | -0.02600 | -1.29667 | -2.19673 |
| O | -1.88181 | -0.08678 | -2.54684 |

### 1c2(I3)

|                  |                                 |
|------------------|---------------------------------|
| Energy           | = -2898.999311                  |
| Enthalpy 0K      | = -2898.516479                  |
| Enthalpy 298K    | = -2898.476658                  |
| Free Energy 298K | = -2898.587792                  |
| Nimag            | = 0 (23.1233 cm <sup>-1</sup> ) |

|   |         |          |         |
|---|---------|----------|---------|
| N | 3.10365 | -0.55664 | 0.41213 |
| C | 2.62247 | -0.58959 | 1.66970 |
| C | 3.45604 | -0.60758 | 2.78682 |
| C | 4.83077 | -0.61520 | 2.59791 |
| C | 5.31990 | -0.64563 | 1.30211 |
| C | 4.43406 | -0.62174 | 0.21857 |
| C | 1.15010 | -0.68742 | 1.79992 |

|    |          |          |          |
|----|----------|----------|----------|
| N  | 0.45040  | -0.73279 | 0.64568  |
| C  | -0.86998 | -0.98204 | 0.70919  |
| C  | -1.54170 | -1.12350 | 1.92108  |
| C  | -0.83659 | -0.99733 | 3.10787  |
| C  | 0.53189  | -0.79457 | 3.04561  |
| C  | -1.62436 | -1.09453 | -0.59511 |
| N  | -2.87389 | -1.83287 | -0.48297 |
| C  | -2.99722 | -3.20272 | -0.57692 |
| C  | -4.31639 | -3.49074 | -0.41175 |
| N  | -4.96797 | -2.29175 | -0.21704 |
| C  | -4.08017 | -1.30398 | -0.26446 |
| C  | -6.39799 | -2.13479 | 0.00525  |
| Mn | 1.59959  | -0.14586 | -1.04133 |
| C  | 2.62511  | 0.82392  | -2.12801 |
| O  | 3.19381  | 1.52553  | -2.85030 |
| C  | 5.00638  | -0.67241 | -1.16689 |
| C  | 1.82378  | -1.79869 | -1.76903 |
| O  | 1.96141  | -2.80896 | -2.30847 |
| C  | 0.36816  | 0.23798  | -2.25621 |
| O  | -0.32452 | 0.50345  | -3.14959 |
| C  | 1.38847  | 1.73696  | -0.11440 |
| O  | 2.30209  | 2.16927  | 0.59221  |
| O  | 0.25179  | 2.34748  | -0.20062 |
| O  | -1.91362 | 2.29455  | -1.44516 |
| O  | -3.54640 | 1.46693  | 0.55716  |
| O  | -2.92585 | 4.75873  | -0.85415 |
| O  | -1.18757 | 2.27813  | 2.04978  |
| O  | -3.38392 | 3.91728  | 1.74476  |
| H  | -1.85155 | -0.09165 | -0.98017 |
| H  | -1.00718 | -1.61595 | -1.33501 |
| H  | 3.04689  | -0.61906 | 3.79477  |
| H  | -2.61255 | -1.31991 | 1.94016  |
| H  | 1.11172  | -0.72940 | 3.96389  |
| H  | -1.34492 | -1.07717 | 4.06995  |
| H  | 6.39270  | -0.68939 | 1.10865  |
| H  | 5.50842  | -0.62000 | 3.45375  |
| H  | -4.84878 | -4.43767 | -0.42206 |
| H  | -2.13967 | -3.84405 | -0.76165 |
| H  | -6.69197 | -2.70571 | 0.89459  |
| H  | -6.94623 | -2.50263 | -0.87098 |
| H  | -6.61637 | -1.07259 | 0.15916  |
| H  | 6.01199  | -1.11222 | -1.13779 |
| H  | 4.38115  | -1.26307 | -1.84646 |
| H  | 5.10233  | 0.33914  | -1.58667 |
| H  | -4.26550 | -0.23819 | -0.08470 |
| H  | -0.97807 | 2.24150  | -1.01466 |
| H  | -3.04032 | 1.75364  | -0.23294 |
| H  | -3.73096 | 2.31404  | 1.02024  |
| H  | -2.51068 | 3.92529  | -1.16724 |
| H  | -3.79170 | 4.75592  | -1.28001 |
| H  | -0.55596 | 2.41281  | 1.29983  |
| H  | -1.82701 | 1.65834  | 1.66310  |
| H  | -2.51309 | 3.53122  | 1.97840  |
| H  | -3.21622 | 4.34296  | 0.87806  |
| H  | -1.81545 | 1.97130  | -2.34809 |

### 1c2(TS2)

|                  |   |                                 |
|------------------|---|---------------------------------|
| Energy           | = | -2898.997131                    |
| Enthalpy 0K      | = | -2898.518849                    |
| Enthalpy 298K    | = | -2898.479277                    |
| Free Energy 298K | = | -2898.590489                    |
| Nimag            | = | 1 (-685.1132 cm <sup>-1</sup> ) |

|    |          |          |          |
|----|----------|----------|----------|
| N  | 3.01875  | -0.56201 | 0.54530  |
| C  | 2.51170  | -0.28602 | 1.76231  |
| C  | 3.32115  | 0.00164  | 2.85877  |
| C  | 4.70037  | -0.04386 | 2.70325  |
| C  | 5.21484  | -0.41840 | 1.47346  |
| C  | 4.35046  | -0.67734 | 0.40244  |
| C  | 1.03811  | -0.38329 | 1.88711  |
| N  | 0.35055  | -0.60164 | 0.74639  |
| C  | -0.96827 | -0.85055 | 0.83360  |
| C  | -1.64570 | -0.84390 | 2.05143  |
| C  | -0.94961 | -0.56025 | 3.21550  |
| C  | 0.41475  | -0.33863 | 3.13351  |
| C  | -1.71080 | -1.11950 | -0.45278 |
| N  | -3.01530 | -1.73467 | -0.26221 |
| C  | -3.25463 | -3.09056 | -0.19761 |
| C  | -4.59307 | -3.24502 | -0.01025 |
| N  | -5.14020 | -1.98070 | 0.03999  |
| C  | -4.17155 | -1.08352 | -0.11533 |
| C  | -6.55321 | -1.68337 | 0.22611  |
| Mn | 1.55644  | -0.39415 | -1.00795 |
| C  | 2.66041  | 0.14451  | -2.30383 |
| O  | 3.27531  | 0.56370  | -3.18562 |
| C  | 4.94816  | -1.09543 | -0.90769 |
| C  | 1.65870  | -2.18901 | -1.32220 |
| O  | 1.73006  | -3.30761 | -1.58472 |
| C  | 0.35480  | -0.20581 | -2.30602 |
| O  | -0.30072 | -0.11755 | -3.25744 |
| C  | 1.57529  | 1.63837  | -0.52770 |
| O  | 2.59898  | 2.16051  | -0.09286 |
| O  | 0.47703  | 2.36707  | -0.58989 |
| O  | -1.65654 | 1.95201  | -1.57304 |
| O  | -3.34157 | 1.67179  | 0.44378  |
| O  | -2.46911 | 4.50579  | -1.52908 |
| O  | -0.93378 | 2.54418  | 1.74486  |
| O  | -3.01292 | 4.30385  | 1.15795  |
| H  | -1.84636 | -0.16828 | -0.98914 |
| H  | -1.12643 | -1.79728 | -1.08474 |
| H  | 2.89006  | 0.25733  | 3.82456  |
| H  | -2.71365 | -1.05100 | 2.09121  |
| H  | 0.98916  | -0.15059 | 4.03818  |
| H  | -1.46202 | -0.53102 | 4.17833  |
| H  | 6.29096  | -0.51308 | 1.32063  |
| H  | 5.36077  | 0.18618  | 3.54143  |
| H  | -5.20371 | -4.13853 | 0.08524  |
| H  | -2.45525 | -3.81959 | -0.29947 |
| H  | -6.90307 | -2.15439 | 1.15283  |
| H  | -7.12373 | -2.07233 | -0.62662 |
| H  | -6.68218 | -0.59763 | 0.29257  |
| H  | 5.91971  | -1.57744 | -0.73487 |
| H  | 4.29948  | -1.79406 | -1.44885 |

|   |          |          |          |
|---|----------|----------|----------|
| H | 5.12678  | -0.22180 | -1.55095 |
| H | -4.26061 | 0.00800  | -0.05571 |
| H | -0.53262 | 2.04409  | -1.13355 |
| H | -2.79351 | 1.76617  | -0.37648 |
| H | -3.48408 | 2.60027  | 0.72544  |
| H | -2.11770 | 3.58179  | -1.61545 |
| H | -3.32934 | 4.46081  | -1.96311 |
| H | -0.32507 | 2.56722  | 0.97449  |
| H | -1.63826 | 1.94613  | 1.44022  |
| H | -2.18212 | 3.89733  | 1.47691  |
| H | -2.80888 | 4.51253  | 0.22028  |
| H | -1.64127 | 1.59575  | -2.46685 |

### 1<sub>c2</sub>(I4)

|                  |   |                               |
|------------------|---|-------------------------------|
| Energy           | = | -2898.998787                  |
| Enthalpy 0K      | = | -2898.516981                  |
| Enthalpy 298K    | = | -2898.477265                  |
| Free Energy 298K | = | -2898.588748                  |
| Nimag            | = | 0 (16.8297 cm <sup>-1</sup> ) |

|    |          |          |          |
|----|----------|----------|----------|
| N  | 3.02194  | -0.56164 | 0.54216  |
| C  | 2.51399  | -0.29296 | 1.76097  |
| C  | 3.32273  | 0.00004  | 2.85612  |
| C  | 4.70220  | -0.03705 | 2.69923  |
| C  | 5.21777  | -0.40993 | 1.46965  |
| C  | 4.35411  | -0.67168 | 0.39869  |
| C  | 1.04144  | -0.40665 | 1.88903  |
| N  | 0.35022  | -0.60509 | 0.74701  |
| C  | -0.96539 | -0.87167 | 0.83381  |
| C  | -1.63469 | -0.90737 | 2.05584  |
| C  | -0.93541 | -0.64628 | 3.22289  |
| C  | 0.42520  | -0.40252 | 3.13966  |
| C  | -1.71176 | -1.10463 | -0.45577 |
| N  | -3.02364 | -1.70727 | -0.27594 |
| C  | -3.28199 | -3.06095 | -0.24519 |
| C  | -4.62156 | -3.20168 | -0.05462 |
| N  | -5.15014 | -1.93144 | 0.03165  |
| C  | -4.16972 | -1.04374 | -0.10570 |
| C  | -6.55734 | -1.61806 | 0.23378  |
| Mn | 1.55854  | -0.37194 | -1.00844 |
| C  | 2.66881  | 0.12605  | -2.31869 |
| O  | 3.28535  | 0.51969  | -3.20946 |
| C  | 4.95356  | -1.08798 | -0.91106 |
| C  | 1.64167  | -2.17138 | -1.31872 |
| O  | 1.70137  | -3.29350 | -1.56133 |
| C  | 0.34938  | -0.18105 | -2.31212 |
| O  | -0.29238 | -0.11377 | -3.27084 |
| C  | 1.61139  | 1.64282  | -0.51887 |
| O  | 2.61785  | 2.17703  | -0.07858 |
| O  | 0.51675  | 2.42463  | -0.59199 |
| O  | -1.73512 | 1.87199  | -1.52810 |
| O  | -3.37507 | 1.70032  | 0.45643  |
| O  | -2.37730 | 4.42585  | -1.52118 |
| O  | -0.99380 | 2.47214  | 1.77054  |
| O  | -2.98967 | 4.34953  | 1.14112  |
| H  | -1.83125 | -0.13155 | -0.96479 |
| H  | -1.13817 | -1.77692 | -1.10341 |

|   |          |          |          |
|---|----------|----------|----------|
| H | 2.89099  | 0.25384  | 3.82204  |
| H | -2.69940 | -1.13103 | 2.09618  |
| H | 1.00237  | -0.23257 | 4.04619  |
| H | -1.44196 | -0.65167 | 4.18929  |
| H | 6.29413  | -0.50035 | 1.31621  |
| H | 5.36190  | 0.19739  | 3.53671  |
| H | -5.24438 | -4.08870 | 0.02051  |
| H | -2.49359 | -3.79827 | -0.37000 |
| H | -6.90905 | -2.10584 | 1.15115  |
| H | -7.13899 | -1.97764 | -0.62434 |
| H | -6.66948 | -0.53239 | 0.32712  |
| H | 5.92257  | -1.57433 | -0.73628 |
| H | 4.30497  | -1.78396 | -1.45579 |
| H | 5.13891  | -0.21304 | -1.55066 |
| H | -4.24307 | 0.04874  | -0.01698 |
| H | -0.32609 | 2.03898  | -1.04325 |
| H | -2.81821 | 1.76533  | -0.37933 |
| H | -3.51738 | 2.63476  | 0.71003  |
| H | -2.07784 | 3.46955  | -1.57796 |
| H | -3.23576 | 4.41568  | -1.96030 |
| H | -0.37354 | 2.53140  | 1.01955  |
| H | -1.72641 | 1.93833  | 1.40847  |
| H | -2.19357 | 3.90764  | 1.49404  |
| H | -2.75077 | 4.50456  | 0.19907  |
| H | -1.84941 | 1.53714  | -2.42302 |

### 1<sub>c2</sub><sup>+</sup>(I5)

|                  |   |                               |
|------------------|---|-------------------------------|
| Energy           | = | -2517.670507                  |
| Enthalpy 0K      | = | -2517.305019                  |
| Enthalpy 298K    | = | -2517.276559                  |
| Free Energy 298K | = | -2517.363303                  |
| Nimag            | = | 0 (25.7834 cm <sup>-1</sup> ) |

|    |          |          |          |
|----|----------|----------|----------|
| N  | -2.45876 | 0.17488  | -0.07059 |
| C  | -2.24069 | 1.47541  | 0.22097  |
| C  | -3.24022 | 2.30073  | 0.72896  |
| C  | -4.51904 | 1.78416  | 0.89407  |
| C  | -4.75844 | 0.47768  | 0.50583  |
| C  | -3.71014 | -0.31406 | 0.02031  |
| C  | -0.88982 | 1.99867  | -0.09795 |
| N  | -0.00459 | 1.11410  | -0.60320 |
| C  | 1.18010  | 1.57699  | -1.03751 |
| C  | 1.54513  | 2.91829  | -0.92017 |
| C  | 0.66275  | 3.81669  | -0.34244 |
| C  | -0.57953 | 3.35012  | 0.05904  |
| C  | 2.18086  | 0.65103  | -1.68041 |
| N  | 3.26572  | 0.30040  | -0.76203 |
| C  | 4.54856  | -0.01984 | -1.14872 |
| C  | 5.22987  | -0.34791 | -0.01765 |
| N  | 4.34729  | -0.22337 | 1.03240  |
| C  | 3.16651  | 0.16935  | 0.56344  |
| C  | 4.65624  | -0.48788 | 2.43031  |
| Mn | -0.65087 | -0.91280 | -0.34586 |
| C  | -1.25350 | -2.54775 | 0.09242  |
| O  | -1.50795 | -3.62996 | 0.38700  |
| C  | -4.01764 | -1.71835 | -0.40120 |
| C  | -0.96818 | -1.12241 | -2.14486 |



O -1.15138 -1.28259 -3.26504  
 C 0.91394 -1.78113 -0.39694  
 O 1.85487 -2.44826 -0.38452  
 C -0.32631 -0.54999 1.64568  
 O 0.61227 0.05216 2.15754  
 O -1.28940 -0.99171 2.49020  
 H 1.70803 -0.26089 -2.05942  
 H 2.64473 1.16360 -2.53152  
 H -3.03678 3.33770 0.98708  
 H 2.52173 3.23890 -1.28662  
 H -1.30398 4.04322 0.48152  
 H 0.92588 4.86921 -0.22671  
 H -5.75842 0.04725 0.57337  
 H -5.32066 2.40661 1.29550  
 H 6.26244 -0.65104 0.13217  
 H 4.86239 0.01922 -2.18813  
 H 5.00686 -1.52207 2.53387  
 H 3.74860 -0.34547 3.02623  
 H 5.43580 0.20505 2.77057  
 H -5.08514 -1.80737 -0.64090  
 H -3.43549 -2.01742 -1.28160  
 H -3.80618 -2.42475 0.41432  
 H 2.24964 0.30292 1.16065  
 H -1.02522 -0.72263 3.38942

**1c5(I3)**

Energy = -2898.998190  
 Enthalpy 0K = -2898.515610  
 Enthalpy 298K = -2898.475545  
 Free Energy 298K = -2898.588112  
 Nimag = 0 (20.5696 cm<sup>-1</sup>)

C -4.22294 -1.05341 -0.04240  
 N -3.00398 -1.63332 -0.32749  
 C -3.16616 -2.95392 -0.42426  
 N -4.44464 -3.24100 -0.20853  
 C -5.12729 -2.06811 0.03299  
 C -1.73544 -0.93910 -0.50299  
 C -0.95994 -0.76123 0.78138  
 N 0.37523 -0.63056 0.68693  
 C 1.09595 -0.56081 1.82709  
 C 0.49041 -0.50043 3.08156  
 C -0.89095 -0.56114 3.17037  
 C -1.62376 -0.73045 2.00552  
 C 2.56727 -0.61340 1.67171  
 N 3.02911 -0.63800 0.40679  
 C 4.34639 -0.81934 0.19427  
 C 5.24223 -0.91832 1.26507  
 C 4.77629 -0.84701 2.56821  
 C 3.41145 -0.71072 2.77715  
 Mn 1.52865 -0.18280 -1.03483  
 C 1.40050 1.73530 -0.16033  
 O 0.32189 2.42586 -0.32540  
 C 4.89102 -0.91973 -1.19968  
 H -6.19412 -2.06019 0.23828  
 C 2.58679 0.71761 -2.14899

O 3.18287 1.37917 -2.88715  
 C 1.66555 -1.86243 -1.71928  
 O 1.74664 -2.89176 -2.23408  
 C 0.30223 0.21430 -2.25102  
 O -0.38728 0.47583 -3.14778  
 O 2.30115 2.10996 0.59433  
 O -1.88691 2.39096 -1.50898  
 O -3.48884 1.81008 0.62402  
 O -2.79546 4.93773 -1.13990  
 O -1.07095 2.68122 1.94666  
 O -3.20631 4.37363 1.54153  
 H -1.94833 0.04058 -0.95146  
 H -1.13739 -1.52071 -1.21252  
 H 3.01592 -0.69182 3.79070  
 H -2.70830 -0.82088 2.04738  
 H 1.08910 -0.40534 3.98509  
 H -1.38981 -0.49963 4.13873  
 H 6.30414 -1.05646 1.05661  
 H 5.46306 -0.91774 3.41382  
 C -5.03863 -4.57004 -0.24226  
 H -2.38153 -3.67241 -0.64993  
 H 5.87299 -1.41030 -1.18233  
 H 4.22398 -1.48679 -1.85955  
 H 5.02890 0.07935 -1.63711  
 H -4.30885 0.02426 0.11770  
 H -0.94448 2.32684 -1.10175  
 H -3.00636 1.99076 -0.20931  
 H -3.63090 2.70935 0.99271  
 H -2.41788 4.06009 -1.36915  
 H -3.67239 4.92025 -1.54208  
 H -0.44596 2.70524 1.17990  
 H -1.74629 2.05639 1.63478  
 H -2.34394 3.97457 1.78503  
 H -3.05198 4.70443 0.63223  
 H -1.82325 2.01108 -2.39287  
 H -5.55968 -4.75583 0.70481  
 H -5.74934 -4.63096 -1.07596  
 H -4.24368 -5.31110 -0.37741

**1c5(TS2)**

Energy = -2898.996054  
 Enthalpy 0K = -2898.516800  
 Enthalpy 298K = -2898.477564  
 Free Energy 298K = -2898.587463  
 Nimag = 1 (-686.4041 cm<sup>-1</sup>)

C -4.32833 -0.58674 0.03726  
 N -3.20889 -1.36569 -0.17220  
 C -3.56588 -2.65079 -0.14594  
 N -4.87353 -2.72316 0.07517  
 C -5.37372 -1.44430 0.19422  
 C -1.85479 -0.88082 -0.39605  
 C -1.08229 -0.60667 0.87126  
 N 0.25407 -0.49674 0.76733  
 C 0.96983 -0.29069 1.89299  
 C 0.36398 -0.11212 3.13555

|    |          |          |          |
|----|----------|----------|----------|
| C  | -1.01557 | -0.18468 | 3.23215  |
| C  | -1.74646 | -0.46100 | 2.08798  |
| C  | 2.44446  | -0.35967 | 1.75952  |
| N  | 2.90918  | -0.74258 | 0.55444  |
| C  | 4.21966  | -1.00691 | 0.41246  |
| C  | 5.11538  | -0.79832 | 1.46851  |
| C  | 4.65388  | -0.31865 | 2.68266  |
| C  | 3.28912  | -0.11618 | 2.84020  |
| Mn | 1.45989  | -0.49096 | -0.99905 |
| C  | 1.69250  | 1.54673  | -0.60657 |
| O  | 0.67420  | 2.38198  | -0.69214 |
| C  | 4.75918  | -1.54044 | -0.88084 |
| H  | -6.42789 | -1.25909 | 0.38092  |
| C  | 2.60388  | -0.12728 | -2.32120 |
| O  | 3.25347  | 0.18612  | -3.22180 |
| C  | 1.37314  | -2.29809 | -1.23948 |
| O  | 1.32693  | -3.42790 | -1.45636 |
| C  | 0.27200  | -0.22717 | -2.29741 |
| O  | -0.37980 | -0.10482 | -3.24736 |
| O  | 2.76891  | 1.98008  | -0.20295 |
| O  | -1.51666 | 2.12597  | -1.60314 |
| O  | -3.14997 | 2.14897  | 0.48445  |
| O  | -2.08060 | 4.74196  | -1.69456 |
| O  | -0.63921 | 2.83527  | 1.66489  |
| O  | -2.52755 | 4.78081  | 1.01773  |
| H  | -1.91611 | 0.05042  | -0.97972 |
| H  | -1.33110 | -1.63555 | -0.99243 |
| H  | 2.89683  | 0.22540  | 3.79606  |
| H  | -2.83006 | -0.55229 | 2.13995  |
| H  | 0.96151  | 0.06659  | 4.02691  |
| H  | -1.51473 | -0.04613 | 4.19247  |
| H  | 6.17382  | -1.01513 | 1.31682  |
| H  | 5.34179  | -0.12715 | 3.50831  |
| C  | -5.65883 | -3.94554 | 0.16426  |
| H  | -2.89689 | -3.49629 | -0.28973 |
| H  | 5.67704  | -2.11282 | -0.69134 |
| H  | 4.03692  | -2.19012 | -1.38872 |
| H  | 5.02171  | -0.71825 | -1.56203 |
| H  | -4.24923 | 0.50188  | 0.09977  |
| H  | -0.37090 | 2.13190  | -1.19188 |
| H  | -2.63182 | 2.12503  | -0.35852 |
| H  | -3.18607 | 3.10447  | 0.69852  |
| H  | -1.82202 | 3.78362  | -1.72644 |
| H  | -2.96358 | 4.74876  | -2.08278 |
| H  | -0.05483 | 2.75177  | 0.88043  |
| H  | -1.41424 | 2.30392  | 1.40916  |
| H  | -1.73815 | 4.30090  | 1.33980  |
| H  | -2.33698 | 4.90238  | 0.06221  |
| H  | -1.55714 | 1.74169  | -2.48440 |
| H  | -6.17019 | -3.97659 | 1.13408  |
| H  | -6.39770 | -3.96377 | -0.64663 |
| H  | -4.98766 | -4.80608 | 0.07309  |

**1c5(I4)**

Energy = -2898.997487  
 Enthalpy 0K = -2898.515481

Enthalpy 298K = -2898.475833  
 Free Energy 298K = -2898.587378  
 Nimag = 0 (9.8963 cm<sup>-1</sup>)

|    |          |          |          |
|----|----------|----------|----------|
| C  | -4.32793 | -0.53308 | 0.05921  |
| N  | -3.22204 | -1.32857 | -0.15955 |
| C  | -3.60039 | -2.60765 | -0.14503 |
| N  | -4.90892 | -2.66073 | 0.07744  |
| C  | -5.38736 | -1.37479 | 0.20961  |
| C  | -1.86030 | -0.86417 | -0.38074 |
| C  | -1.08353 | -0.61081 | 0.88664  |
| N  | 0.25178  | -0.49172 | 0.77692  |
| C  | 0.97290  | -0.29260 | 1.90025  |
| C  | 0.37425  | -0.13765 | 3.14932  |
| C  | -1.00424 | -0.22185 | 3.25307  |
| C  | -1.74063 | -0.48472 | 2.10964  |
| C  | 2.44772  | -0.34735 | 1.75874  |
| N  | 2.91009  | -0.74466 | 0.55694  |
| C  | 4.22107  | -1.00632 | 0.41437  |
| C  | 5.12001  | -0.77443 | 1.46287  |
| C  | 4.66145  | -0.27292 | 2.66907  |
| C  | 3.29595  | -0.07660 | 2.82967  |
| Mn | 1.45834  | -0.49168 | -0.99558 |
| C  | 1.72834  | 1.53067  | -0.62408 |
| O  | 0.71822  | 2.41448  | -0.72609 |
| C  | 4.75765  | -1.56367 | -0.86998 |
| H  | -6.43803 | -1.17399 | 0.39989  |
| C  | 2.60133  | -0.19065 | -2.33728 |
| O  | 3.24784  | 0.08255  | -3.25160 |
| C  | 1.34940  | -2.30414 | -1.20697 |
| O  | 1.29234  | -3.43780 | -1.39048 |
| C  | 0.26061  | -0.23832 | -2.29930 |
| O  | -0.38315 | -0.14664 | -3.25454 |
| O  | 2.79317  | 1.98189  | -0.23009 |
| O  | -1.59841 | 2.04261  | -1.58105 |
| O  | -3.14688 | 2.18801  | 0.49226  |
| O  | -1.96816 | 4.64450  | -1.73841 |
| O  | -0.66964 | 2.80428  | 1.67407  |
| O  | -2.46589 | 4.83960  | 0.94362  |
| H  | -1.90052 | 0.08123  | -0.95089 |
| H  | -1.35169 | -1.62462 | -0.98267 |
| H  | 2.90537  | 0.28164  | 3.78017  |
| H  | -2.82352 | -0.58232 | 2.16691  |
| H  | 0.97661  | 0.02839  | 4.03997  |
| H  | -1.49805 | -0.10248 | 4.21875  |
| H  | 6.17868  | -0.98973 | 1.31080  |
| H  | 5.35203  | -0.06035 | 3.48726  |
| C  | -5.71331 | -3.87114 | 0.15804  |
| H  | -2.94619 | -3.46305 | -0.29797 |
| H  | 5.67071  | -2.14006 | -0.66970 |
| H  | 4.03195  | -2.21701 | -1.36823 |
| H  | 5.02894  | -0.75437 | -1.56309 |
| H  | -4.23013 | 0.55422  | 0.13226  |
| H  | -0.17392 | 2.09239  | -1.13539 |
| H  | -2.63671 | 2.12357  | -0.36949 |
| H  | -3.18446 | 3.15030  | 0.66223  |
| H  | -1.77506 | 3.65909  | -1.73000 |

|   |          |          |          |
|---|----------|----------|----------|
| H | -2.84485 | 4.69431  | -2.13691 |
| H | -0.07816 | 2.74004  | 0.90045  |
| H | -1.46993 | 2.32965  | 1.37586  |
| H | -1.71224 | 4.33633  | 1.30763  |
| H | -2.25001 | 4.89180  | -0.01487 |
| H | -1.76604 | 1.67702  | -2.45521 |
| H | -6.21878 | -3.90524 | 1.13088  |
| H | -6.45780 | -3.86848 | -0.64789 |
| H | -5.05672 | -4.74121 | 0.05250  |

### 2c2(I3)

|                  |   |                               |
|------------------|---|-------------------------------|
| Energy           | = | -2938.284420                  |
| Enthalpy 0K      | = | -2937.774144                  |
| Enthalpy 298K    | = | -2937.732480                  |
| Free Energy 298K | = | -2937.848400                  |
| Nimag            | = | 0 (17.5486 cm <sup>-1</sup> ) |

|    |          |          |          |
|----|----------|----------|----------|
| N  | 3.14233  | -0.62684 | 0.46222  |
| C  | 2.66551  | -0.41550 | 1.70466  |
| C  | 3.49393  | -0.35861 | 2.82383  |
| C  | 4.85978  | -0.53990 | 2.65592  |
| C  | 5.34043  | -0.80490 | 1.38373  |
| C  | 4.45935  | -0.84962 | 0.29669  |
| C  | 1.19263  | -0.32887 | 1.82749  |
| N  | 0.49478  | -0.58769 | 0.70099  |
| C  | -0.83901 | -0.70626 | 0.78810  |
| C  | -1.53152 | -0.44865 | 1.97001  |
| C  | -0.82281 | -0.07959 | 3.10238  |
| C  | 0.56264  | -0.05019 | 3.03823  |
| C  | -1.59901 | -1.14200 | -0.44317 |
| N  | -2.76997 | -1.94224 | -0.11527 |
| C  | -2.71313 | -3.19548 | 0.45993  |
| C  | -3.99358 | -3.61859 | 0.60543  |
| N  | -4.80806 | -2.62031 | 0.11265  |
| C  | -4.05242 | -1.60624 | -0.32596 |
| C  | -6.26376 | -2.67041 | 0.08213  |
| Mn | 1.66706  | -0.34797 | -1.05011 |
| C  | 2.74484  | 0.34948  | -2.28758 |
| O  | 3.35611  | 0.87282  | -3.11719 |
| C  | 5.01822  | -1.15081 | -1.06185 |
| C  | 1.76861  | -2.09970 | -1.53460 |
| O  | 1.82906  | -3.18220 | -1.92900 |
| C  | 0.42352  | -0.02506 | -2.27142 |
| O  | -0.29766 | 0.19860  | -3.15286 |
| C  | 1.59774  | 1.66415  | -0.41856 |
| O  | 2.59246  | 2.16808  | 0.11004  |
| O  | 0.47314  | 2.29950  | -0.48713 |
| O  | -1.82324 | 2.06736  | -1.44468 |
| O  | -3.22860 | 2.04677  | 0.94068  |
| O  | -2.57425 | 4.69313  | -1.52054 |
| O  | -0.66532 | 3.06710  | 1.81075  |
| O  | -2.77392 | 4.74393  | 1.23545  |
| H  | -1.92826 | -0.25564 | -0.99953 |
| H  | -0.95001 | -1.74341 | -1.08928 |
| H  | 3.08446  | -0.18793 | 3.81765  |
| H  | -2.61856 | -0.51578 | 1.98978  |

|   |          |          |          |
|---|----------|----------|----------|
| H | 1.14337  | 0.19685  | 3.92495  |
| H | -1.34151 | 0.16234  | 4.03135  |
| H | 6.40272  | -0.98517 | 1.21258  |
| H | 5.53517  | -0.49596 | 3.51244  |
| H | -4.40024 | -4.54057 | 1.01074  |
| H | -1.76773 | -3.66832 | 0.71129  |
| H | -6.57932 | -3.62956 | 0.50561  |
| H | -6.62167 | -2.59563 | -0.95241 |
| H | -6.68130 | -1.85282 | 0.68302  |
| H | 5.99424  | -1.64377 | -0.96370 |
| H | 4.35156  | -1.79866 | -1.64332 |
| H | 5.17233  | -0.22413 | -1.63306 |
| H | -0.84577 | 2.06804  | -1.11364 |
| H | -2.80140 | 1.98921  | 0.06379  |
| H | -3.30692 | 3.01532  | 1.07890  |
| H | -2.26589 | 3.76064  | -1.56723 |
| H | -3.48355 | 4.64763  | -1.84007 |
| H | -0.12517 | 2.89403  | 0.99885  |
| H | -1.38614 | 2.42256  | 1.71509  |
| H | -1.91028 | 4.35196  | 1.48661  |
| H | -2.68892 | 4.86671  | 0.26724  |
| H | -1.81280 | 1.64073  | -2.30907 |
| C | -4.54071 | -0.34002 | -0.91681 |
| H | -4.03909 | -0.14834 | -1.87589 |
| H | -5.62071 | -0.39226 | -1.09305 |
| H | -4.32843 | 0.50060  | -0.23666 |

### 2c2(TS2)

|                  |   |                                 |
|------------------|---|---------------------------------|
| Energy           | = | -2938.282412                    |
| Enthalpy 0K      | = | -2937.776292                    |
| Enthalpy 298K    | = | -2937.735138                    |
| Free Energy 298K | = | -2937.849826                    |
| Nimag            | = | 1 (-659.9434 cm <sup>-1</sup> ) |

|    |          |          |          |
|----|----------|----------|----------|
| N  | 3.02516  | -0.66720 | 0.60906  |
| C  | 2.54222  | -0.13095 | 1.74767  |
| C  | 3.37171  | 0.26541  | 2.79362  |
| C  | 4.74052  | 0.05868  | 2.67804  |
| C  | 5.22105  | -0.57310 | 1.54352  |
| C  | 4.33965  | -0.93109 | 0.51562  |
| C  | 1.06534  | -0.06390 | 1.85299  |
| N  | 0.37307  | -0.46115 | 0.76470  |
| C  | -0.95941 | -0.59571 | 0.86765  |
| C  | -1.65114 | -0.25638 | 2.02912  |
| C  | -0.94793 | 0.22187  | 3.12262  |
| C  | 0.43323  | 0.30141  | 3.03979  |
| C  | -1.71594 | -1.12455 | -0.32770 |
| N  | -2.96760 | -1.76881 | 0.03480  |
| C  | -3.05469 | -2.99554 | 0.66053  |
| C  | -4.37480 | -3.25345 | 0.83534  |
| N  | -5.06947 | -2.18264 | 0.31129  |
| C  | -4.20251 | -1.28607 | -0.17517 |
| C  | -6.52111 | -2.05746 | 0.29303  |
| Mn | 1.59350  | -0.62629 | -0.97667 |
| C  | 2.73636  | -0.44210 | -2.33861 |
| O  | 3.38443  | -0.26152 | -3.27523 |

|   |          |          |          |
|---|----------|----------|----------|
| C | 4.89597  | -1.62306 | -0.69242 |
| C | 1.51092  | -2.44870 | -1.02796 |
| O | 1.46742  | -3.59506 | -1.12680 |
| C | 0.39198  | -0.44837 | -2.27694 |
| O | -0.28462 | -0.36073 | -3.21288 |
| C | 1.83128  | 1.44183  | -0.81404 |
| O | 2.93901  | 1.92303  | -0.58735 |
| O | 0.79274  | 2.25656  | -0.85625 |
| O | -1.46646 | 1.85428  | -1.51942 |
| O | -2.83954 | 2.32280  | 0.73039  |
| O | -2.04629 | 4.41133  | -2.04003 |
| O | -0.24393 | 3.22100  | 1.48753  |
| O | -2.19637 | 5.01836  | 0.63153  |
| H | -1.92855 | -0.27883 | -0.99565 |
| H | -1.10858 | -1.86029 | -0.86557 |
| H | 2.96445  | 0.72701  | 3.69105  |
| H | -2.73472 | -0.35737 | 2.06850  |
| H | 1.00985  | 0.63490  | 3.89994  |
| H | -1.46807 | 0.51352  | 4.03641  |
| H | 6.28329  | -0.79610 | 1.43271  |
| H | 5.41683  | 0.36616  | 3.47783  |
| H | -4.88487 | -4.10286 | 1.28048  |
| H | -2.16929 | -3.56900 | 0.92081  |
| H | -6.94641 | -2.94963 | 0.76447  |
| H | -6.87995 | -1.98794 | -0.74154 |
| H | -6.82884 | -1.16770 | 0.85656  |
| H | 5.81781  | -2.15645 | -0.42432 |
| H | 4.18339  | -2.34060 | -1.11604 |
| H | 5.15542  | -0.89324 | -1.47291 |
| H | -0.27958 | 1.93265  | -1.21356 |
| H | -2.40892 | 2.09445  | -0.12818 |
| H | -2.86955 | 3.30123  | 0.70944  |
| H | -1.79050 | 3.46130  | -1.89323 |
| H | -2.96993 | 4.35402  | -2.31203 |
| H | 0.25504  | 2.95865  | 0.68363  |
| H | -1.03914 | 2.66030  | 1.43169  |
| H | -1.37979 | 4.59463  | 0.96491  |
| H | -2.10555 | 4.93770  | -0.34266 |
| H | -1.56580 | 1.39235  | -2.35737 |
| C | -4.53561 | 0.00804  | -0.81056 |
| H | -4.08621 | 0.06570  | -1.81244 |
| H | -5.62108 | 0.11893  | -0.90737 |
| H | -4.14010 | 0.84100  | -0.20634 |

### 3C<sub>2</sub>(I4)

|                  |                                 |
|------------------|---------------------------------|
| Energy           | = -2938.283469                  |
| Enthalpy 0K      | = -2937.774220                  |
| Enthalpy 298K    | = -2937.732773                  |
| Free Energy 298K | = -2937.847935                  |
| Nimag            | = 0 (15.4125 cm <sup>-1</sup> ) |

|   |         |          |         |
|---|---------|----------|---------|
| N | 3.04069 | -0.66910 | 0.57905 |
| C | 2.57243 | -0.16118 | 1.73684 |
| C | 3.41565 | 0.20702  | 2.78214 |
| C | 4.78229 | -0.00033 | 2.64546 |
| C | 5.24761 | -0.60538 | 1.49033 |

|    |          |          |          |
|----|----------|----------|----------|
| C  | 4.35344  | -0.93491 | 0.46406  |
| C  | 1.09691  | -0.09629 | 1.86488  |
| N  | 0.38698  | -0.45936 | 0.77547  |
| C  | -0.94349 | -0.59983 | 0.89586  |
| C  | -1.61582 | -0.30035 | 2.08001  |
| C  | -0.89541 | 0.14375  | 3.17599  |
| C  | 0.48427  | 0.22902  | 3.07283  |
| C  | -1.71892 | -1.07926 | -0.30655 |
| N  | -2.97050 | -1.73022 | 0.04583  |
| C  | -3.05493 | -2.95788 | 0.67086  |
| C  | -4.37464 | -3.23207 | 0.82093  |
| N  | -5.07223 | -2.17111 | 0.28099  |
| C  | -4.20721 | -1.26468 | -0.19098 |
| C  | -6.52461 | -2.06370 | 0.23593  |
| Mn | 1.58906  | -0.58195 | -0.98783 |
| C  | 2.71622  | -0.39802 | -2.36482 |
| O  | 3.35120  | -0.21519 | -3.30898 |
| C  | 4.89465  | -1.59829 | -0.76660 |
| C  | 1.49991  | -2.40566 | -1.06014 |
| O  | 1.45417  | -3.55059 | -1.15832 |
| C  | 0.36731  | -0.40417 | -2.28060 |
| O  | -0.30564 | -0.34267 | -3.21796 |
| C  | 1.84569  | 1.46825  | -0.78894 |
| O  | 2.93363  | 1.96230  | -0.53037 |
| O  | 0.81095  | 2.32372  | -0.85733 |
| O  | -1.54285 | 1.82807  | -1.49866 |
| O  | -2.83567 | 2.25200  | 0.73820  |
| O  | -2.02813 | 4.36673  | -1.97533 |
| O  | -0.30491 | 3.14701  | 1.56477  |
| O  | -2.24382 | 4.97621  | 0.67956  |
| H  | -1.92387 | -0.19770 | -0.93424 |
| H  | -1.12396 | -1.79946 | -0.87811 |
| H  | 3.02018  | 0.64674  | 3.69567  |
| H  | -2.69844 | -0.40404 | 2.13279  |
| H  | 1.07481  | 0.53517  | 3.93366  |
| H  | -1.40040 | 0.40428  | 4.10754  |
| H  | 6.30768  | -0.82892 | 1.36174  |
| H  | 5.46870  | 0.28542  | 3.44465  |
| H  | -4.88256 | -4.08658 | 1.25872  |
| H  | -2.16797 | -3.52026 | 0.94937  |
| H  | -6.94743 | -2.96077 | 0.70031  |
| H  | -6.86557 | -1.99938 | -0.80501 |
| H  | -6.85365 | -1.17739 | 0.79288  |
| H  | 5.82066  | -2.13574 | -0.52243 |
| H  | 4.17891  | -2.30881 | -1.19670 |
| H  | 5.14359  | -0.85065 | -1.53348 |
| H  | -0.11035 | 1.95425  | -1.16258 |
| H  | -2.41400 | 2.04724  | -0.14366 |
| H  | -2.90516 | 3.22705  | 0.72814  |
| H  | -1.79899 | 3.39782  | -1.83451 |
| H  | -2.94681 | 4.33571  | -2.26670 |
| H  | 0.21008  | 2.94282  | 0.76034  |
| H  | -1.10703 | 2.60117  | 1.44600  |
| H  | -1.44053 | 4.55103  | 1.03794  |
| H  | -2.12851 | 4.87909  | -0.29244 |
| H  | -1.74311 | 1.38602  | -2.32911 |
| C  | -4.54537 | 0.02038  | -0.84120 |

|   |          |         |          |
|---|----------|---------|----------|
| H | -4.07921 | 0.07675 | -1.83532 |
| H | -5.63039 | 0.11767 | -0.95586 |
| H | -4.16510 | 0.85970 | -0.23559 |

**2<sub>C5</sub>(I3)**

|                  |   |                               |
|------------------|---|-------------------------------|
| Energy           | = | -2938.286070                  |
| Enthalpy 0K      | = | -2937.775129                  |
| Enthalpy 298K    | = | -2937.733576                  |
| Free Energy 298K | = | -2937.848978                  |
| Nimag            | = | 0 (20.0099 cm <sup>-1</sup> ) |

|    |          |          |          |
|----|----------|----------|----------|
| C  | 3.44134  | -0.67090 | 2.79789  |
| C  | 2.59669  | -0.55895 | 1.69428  |
| N  | 3.04754  | -0.64572 | 0.42809  |
| C  | 4.35061  | -0.91011 | 0.21441  |
| C  | 5.24650  | -1.02883 | 1.28316  |
| C  | 4.79476  | -0.89094 | 2.58601  |
| C  | 1.13173  | -0.42140 | 1.85424  |
| N  | 0.40423  | -0.48228 | 0.71796  |
| C  | -0.93500 | -0.53275 | 0.81822  |
| C  | -1.59251 | -0.43109 | 2.04207  |
| C  | -0.84793 | -0.27424 | 3.20088  |
| C  | 0.53479  | -0.29469 | 3.10771  |
| C  | -1.73140 | -0.70285 | -0.45368 |
| N  | -2.98599 | -1.40958 | -0.25292 |
| C  | -4.21768 | -0.82982 | -0.02709 |
| C  | -5.10753 | -1.84962 | 0.08921  |
| N  | -4.40426 | -3.02691 | -0.06898 |
| C  | -3.11360 | -2.74522 | -0.27361 |
| C  | -4.98278 | -4.36313 | -0.02998 |
| Mn | 1.56323  | -0.15113 | -1.01982 |
| C  | 0.35492  | 0.28795  | -2.23952 |
| O  | -0.32507 | 0.57139  | -3.13680 |
| C  | 4.87810  | -1.08471 | -1.17880 |
| C  | 1.53188  | 1.79678  | -0.20445 |
| O  | 2.46123  | 2.15890  | 0.52090  |
| C  | 2.66474  | 0.64970  | -2.16861 |
| O  | 3.29263  | 1.25320  | -2.92976 |
| C  | 1.58605  | -1.86139 | -1.64091 |
| O  | 1.58699  | -2.91545 | -2.11017 |
| O  | 0.47610  | 2.52213  | -0.37075 |
| O  | -1.74766 | 2.57091  | -1.53852 |
| O  | -3.41543 | 2.06388  | 0.57365  |
| O  | -2.59316 | 5.14780  | -1.23724 |
| O  | -0.94696 | 2.90230  | 1.86366  |
| O  | -3.04508 | 4.63547  | 1.44744  |
| H  | -6.17779 | -1.84611 | 0.27475  |
| H  | -1.95955 | 0.27894  | -0.88912 |
| H  | -1.14157 | -1.26528 | -1.18391 |
| H  | 3.05377  | -0.59892 | 3.81218  |
| H  | -2.68081 | -0.45340 | 2.08309  |
| H  | 1.14099  | -0.21008 | 4.00740  |
| H  | -1.33890 | -0.15798 | 4.16827  |
| H  | 6.29711  | -1.23489 | 1.07357  |
| H  | 5.48242  | -0.97525 | 3.42965  |
| C  | -2.01952 | -3.71341 | -0.51853 |

|   |          |          |          |
|---|----------|----------|----------|
| H | 5.82880  | -1.63307 | -1.15200 |
| H | 4.17299  | -1.62998 | -1.81728 |
| H | 5.07292  | -0.10939 | -1.64723 |
| H | -4.31685 | 0.25266  | 0.07206  |
| H | -0.80851 | 2.47168  | -1.13500 |
| H | -2.91612 | 2.22310  | -0.25349 |
| H | -3.52615 | 2.97069  | 0.93409  |
| H | -2.23224 | 4.25663  | -1.43934 |
| H | -3.46191 | 5.14170  | -1.65714 |
| H | -0.30762 | 2.87612  | 1.10874  |
| H | -1.63823 | 2.28868  | 1.56583  |
| H | -2.19065 | 4.22051  | 1.69179  |
| H | -2.88485 | 4.94914  | 0.53310  |
| H | -1.70082 | 2.17363  | -2.41590 |
| H | -4.53284 | -4.94318 | 0.78581  |
| H | -6.05882 | -4.26508 | 0.14649  |
| H | -4.81538 | -4.87291 | -0.98711 |
| H | -2.32354 | -4.72302 | -0.21958 |
| H | -1.76014 | -3.72784 | -1.58850 |
| H | -1.12089 | -3.43411 | 0.04852  |

**2<sub>C5</sub>(TS2)**

|                  |   |                                 |
|------------------|---|---------------------------------|
| Energy           | = | -2938.283681                    |
| Enthalpy 0K      | = | -2937.777356                    |
| Enthalpy 298K    | = | -2937.736209                    |
| Free Energy 298K | = | -2937.851149                    |
| Nimag            | = | 1 (-695.8701 cm <sup>-1</sup> ) |

|    |          |          |          |
|----|----------|----------|----------|
| C  | 3.34937  | -0.22461 | 2.84355  |
| C  | 2.48943  | -0.40970 | 1.76358  |
| N  | 2.92534  | -0.82342 | 0.55788  |
| C  | 4.21396  | -1.17884 | 0.41525  |
| C  | 5.12290  | -1.03201 | 1.47050  |
| C  | 4.69691  | -0.52075 | 2.68484  |
| C  | 1.02357  | -0.23953 | 1.89781  |
| N  | 0.29651  | -0.39184 | 0.77094  |
| C  | -1.04369 | -0.40523 | 0.87342  |
| C  | -1.69793 | -0.21607 | 2.08973  |
| C  | -0.95100 | 0.00224  | 3.23587  |
| C  | 0.43062  | -0.02368 | 3.14057  |
| C  | -1.83897 | -0.61445 | -0.39144 |
| N  | -3.20325 | -1.05729 | -0.15912 |
| C  | -4.30311 | -0.23655 | -0.01158 |
| C  | -5.37327 | -1.05469 | 0.16233  |
| N  | -4.90820 | -2.35357 | 0.11621  |
| C  | -3.58512 | -2.34099 | -0.07479 |
| C  | -5.73555 | -3.54552 | 0.24426  |
| Mn | 1.49419  | -0.47129 | -0.99536 |
| C  | 0.32961  | -0.11671 | -2.29298 |
| O  | -0.31092 | 0.05879  | -3.24228 |
| C  | 4.71258  | -1.75126 | -0.87778 |
| C  | 1.86667  | 1.54579  | -0.60496 |
| O  | 2.97718  | 1.90684  | -0.22360 |
| C  | 2.66077  | -0.19447 | -2.31946 |
| O  | 3.33045  | 0.06960  | -3.22098 |
| C  | 1.27301  | -2.26800 | -1.23224 |

|   |          |          |          |
|---|----------|----------|----------|
| O | 1.14068  | -3.39174 | -1.44590 |
| O | 0.90209  | 2.44534  | -0.66629 |
| O | -1.29743 | 2.34786  | -1.58995 |
| O | -2.97492 | 2.45743  | 0.46287  |
| O | -1.69019 | 4.99058  | -1.68872 |
| O | -0.42873 | 2.97509  | 1.66927  |
| O | -2.18057 | 5.04294  | 1.01593  |
| H | -6.42509 | -0.83212 | 0.31762  |
| H | -1.87133 | 0.33424  | -0.94887 |
| H | -1.34529 | -1.36192 | -1.02027 |
| H | 2.98140  | 0.14419  | 3.79890  |
| H | -2.78579 | -0.22610 | 2.13586  |
| H | 1.03893  | 0.10844  | 4.03284  |
| H | -1.43996 | 0.17305  | 4.19627  |
| H | 6.16364  | -1.32195 | 1.31828  |
| H | 5.39741  | -0.37681 | 3.50956  |
| C | -2.69150 | -3.51586 | -0.19841 |
| H | 5.58198  | -2.39461 | -0.68743 |
| H | 3.94156  | -2.34012 | -1.38814 |
| H | 5.04057  | -0.95115 | -1.55691 |
| H | -4.19115 | 0.84937  | 0.00793  |
| H | -0.15489 | 2.27142  | -1.17011 |
| H | -2.44145 | 2.40919  | -0.36907 |
| H | -2.95165 | 3.41125  | 0.68494  |
| H | -1.49236 | 4.01742  | -1.71638 |
| H | -2.56285 | 5.05310  | -2.09482 |
| H | 0.16490  | 2.85043  | 0.89773  |
| H | -1.23483 | 2.50109  | 1.39764  |
| H | -1.42695 | 4.51169  | 1.34263  |
| H | -1.97140 | 5.15705  | 0.06335  |
| H | -1.35665 | 1.96488  | -2.47082 |
| H | -5.43822 | -4.11627 | 1.13338  |
| H | -6.77780 | -3.22687 | 0.34942  |
| H | -5.63531 | -4.17049 | -0.65185 |
| H | -3.19341 | -4.42352 | 0.15536  |
| H | -2.39932 | -3.66276 | -1.24968 |
| H | -1.77872 | -3.36362 | 0.39398  |

### 2c5(14)

|                  |   |                               |
|------------------|---|-------------------------------|
| Energy           | = | -2938.285044                  |
| Enthalpy 0K      | = | -2937.775825                  |
| Enthalpy 298K    | = | -2937.734299                  |
| Free Energy 298K | = | -2937.849751                  |
| Nimag            | = | 0 (12.6650 cm <sup>-1</sup> ) |

|   |          |          |         |
|---|----------|----------|---------|
| C | 3.36788  | -0.18829 | 2.83404 |
| C | 2.50259  | -0.39239 | 1.76202 |
| N | 2.93510  | -0.81319 | 0.55704 |
| C | 4.22533  | -1.16166 | 0.41069 |
| C | 5.13909  | -0.99777 | 1.45926 |
| C | 4.71677  | -0.47569 | 2.67005 |
| C | 1.03567  | -0.23568 | 1.90557 |
| N | 0.30217  | -0.38515 | 0.78263 |
| C | -1.03752 | -0.41164 | 0.89323 |
| C | -1.68458 | -0.24092 | 2.11633 |
| C | -0.93170 | -0.02798 | 3.25923 |

|    |          |          |          |
|----|----------|----------|----------|
| C  | 0.44959  | -0.03838 | 3.15448  |
| C  | -1.83684 | -0.60442 | -0.36989 |
| N  | -3.20551 | -1.03477 | -0.13998 |
| C  | -4.29601 | -0.20370 | 0.01964  |
| C  | -5.37505 | -1.01221 | 0.18498  |
| N  | -4.92461 | -2.31565 | 0.12181  |
| C  | -3.60181 | -2.31499 | -0.07134 |
| C  | -5.76436 | -3.50000 | 0.23722  |
| Mn | 1.49731  | -0.46530 | -0.99190 |
| C  | 0.31587  | -0.12856 | -2.29078 |
| O  | -0.32446 | 0.01075  | -3.24273 |
| C  | 4.72105  | -1.74501 | -0.87838 |
| C  | 1.90015  | 1.53551  | -0.62153 |
| O  | 2.99911  | 1.91604  | -0.24705 |
| C  | 2.65110  | -0.24529 | -2.34053 |
| O  | 3.30816  | -0.01991 | -3.26026 |
| C  | 1.26423  | -2.26710 | -1.19882 |
| O  | 1.12829  | -3.39481 | -1.37824 |
| O  | 0.94520  | 2.48126  | -0.69840 |
| O  | -1.38702 | 2.27170  | -1.56609 |
| O  | -2.98401 | 2.47817  | 0.46968  |
| O  | -1.64929 | 4.88372  | -1.73703 |
| O  | -0.47677 | 2.95341  | 1.67156  |
| O  | -2.15551 | 5.08611  | 0.94453  |
| H  | -6.42411 | -0.78014 | 0.34489  |
| H  | -1.85234 | 0.35656  | -0.91468 |
| H  | -1.35359 | -1.35307 | -1.00509 |
| H  | 3.00294  | 0.18867  | 3.78746  |
| H  | -2.77203 | -0.26206 | 2.17001  |
| H  | 1.06268  | 0.08870  | 4.04413  |
| H  | -1.41538 | 0.12680  | 4.22503  |
| H  | 6.18079  | -1.28253 | 1.30413  |
| H  | 5.42120  | -0.31690 | 3.48865  |
| C  | -2.72141 | -3.49809 | -0.21000 |
| H  | 5.59459  | -2.38162 | -0.68451 |
| H  | 3.95195  | -2.34512 | -1.37857 |
| H  | 5.04306  | -0.95056 | -1.56700 |
| H  | -4.17053 | 0.88133  | 0.05286  |
| H  | 0.03228  | 2.22438  | -1.11088 |
| H  | -2.45679 | 2.39660  | -0.37922 |
| H  | -2.96914 | 3.43890  | 0.65067  |
| H  | -1.49401 | 3.89144  | -1.72228 |
| H  | -2.52155 | 4.96421  | -2.14017 |
| H  | 0.12737  | 2.84714  | 0.91270  |
| H  | -1.29749 | 2.52383  | 1.36155  |
| H  | -1.43117 | 4.53975  | 1.30593  |
| H  | -1.93382 | 5.13481  | -0.01269 |
| H  | -1.55904 | 1.91061  | -2.44137 |
| H  | -5.46777 | -4.08769 | 1.11546  |
| H  | -6.80218 | -3.17141 | 0.35469  |
| H  | -5.67765 | -4.11240 | -0.66895 |
| H  | -3.23958 | -4.40721 | 0.11541  |
| H  | -2.41590 | -3.62443 | -1.26010 |
| H  | -1.81533 | -3.37071 | 0.39840  |

**2<sub>C5</sub><sup>+</sup>(I5)**  
 Energy = -2556.955424  
 Enthalpy 0K = -2556.562510  
 Enthalpy 298K = -2556.532227  
 Free Energy 298K = -2556.622888  
 Nimag = 0 (20.7891 cm<sup>-1</sup>)

|    |          |          |          |
|----|----------|----------|----------|
| C  | -4.39616 | 0.01329  | 0.50003  |
| N  | -3.10308 | 0.27089  | 0.24782  |
| C  | -2.88064 | 0.22825  | -1.11485 |
| C  | -4.07659 | -0.05792 | -1.69012 |
| N  | -5.00137 | -0.18767 | -0.67517 |
| C  | -2.09226 | 0.52878  | 1.27325  |
| C  | -1.04191 | 1.49050  | 0.77738  |
| N  | 0.19674  | 1.06455  | 0.48182  |
| C  | 1.11966  | 1.98134  | 0.12093  |
| C  | 0.79959  | 3.32968  | -0.03939 |
| C  | -0.49505 | 3.75890  | 0.21253  |
| C  | -1.42100 | 2.82744  | 0.65226  |
| C  | 2.51155  | 1.49157  | -0.03413 |
| N  | 2.71271  | 0.18135  | 0.22536  |
| C  | 3.97340  | -0.28892 | 0.27649  |
| C  | 5.06263  | 0.53655  | -0.02919 |
| C  | 4.85379  | 1.85819  | -0.38220 |
| C  | 3.55558  | 2.35190  | -0.36428 |
| Mn | 0.90446  | -0.93900 | 0.21302  |
| C  | 0.83832  | -0.47757 | -1.78396 |
| O  | 1.90843  | -0.88496 | -2.51459 |
| C  | 4.24664  | -1.70896 | 0.66773  |
| C  | -6.41420 | -0.48630 | -0.86556 |
| C  | 1.57917  | -2.54540 | -0.22154 |
| O  | 1.88337  | -3.61147 | -0.52919 |
| C  | 0.98165  | -1.25103 | 2.02124  |
| O  | 1.01589  | -1.48443 | 3.14386  |
| C  | -0.64770 | -1.80673 | -0.00078 |
| O  | -1.57519 | -2.46694 | -0.18186 |
| O  | -0.02475 | 0.15085  | -2.38301 |
| H  | -1.65467 | -0.41446 | 1.61474  |
| H  | -2.59864 | 0.98662  | 2.13160  |
| H  | 3.37139  | 3.39842  | -0.59777 |
| H  | -2.44286 | 3.11807  | 0.90234  |
| H  | 1.55337  | 4.04947  | -0.35056 |
| H  | -0.76636 | 4.80865  | 0.09051  |
| H  | 6.06990  | 0.12026  | 0.01456  |
| H  | 5.69045  | 2.50847  | -0.64356 |
| H  | -4.35206 | -0.18562 | -2.73296 |
| H  | -1.88661 | 0.36858  | -1.55292 |
| H  | -7.02897 | 0.33706  | -0.48060 |
| H  | -6.67405 | -1.41985 | -0.35075 |
| H  | -6.59532 | -0.60297 | -1.93914 |
| H  | 5.27540  | -1.79899 | 1.04011  |
| H  | 3.56007  | -2.05629 | 1.44949  |
| H  | 4.15397  | -2.37697 | -0.20059 |
| C  | -5.02374 | -0.03687 | 1.84055  |
| H  | 1.76456  | -0.57032 | -3.42623 |
| H  | -6.08260 | -0.30602 | 1.76203  |
| H  | -4.51521 | -0.78065 | 2.47081  |

H -4.94659 0.94328 2.33464

**3<sub>C2</sub>(I3)**  
 Energy = -3016.854647  
 Enthalpy 0K = -3016.288571  
 Enthalpy 298K = -3016.243681  
 Free Energy 298K = -3016.365739  
 Nimag = 0 (19.7660 cm<sup>-1</sup>)

|    |          |          |          |
|----|----------|----------|----------|
| C  | -4.08211 | -0.67977 | -0.49741 |
| N  | -2.85647 | -1.20680 | -0.35793 |
| C  | -2.95193 | -2.53561 | 0.03860  |
| C  | -4.28466 | -2.80791 | 0.14667  |
| N  | -4.96152 | -1.63984 | -0.18944 |
| C  | -1.59676 | -0.52494 | -0.60199 |
| C  | -0.80585 | -0.32052 | 0.66938  |
| N  | 0.52699  | -0.46229 | 0.62322  |
| C  | 1.21699  | -0.43795 | 1.78315  |
| C  | 0.60754  | -0.13352 | 2.99808  |
| C  | -0.75868 | 0.10767  | 3.02790  |
| C  | -1.48048 | -0.02560 | 1.85271  |
| C  | 2.64599  | -0.81161 | 1.68618  |
| N  | 3.12233  | -1.00301 | 0.44023  |
| C  | 4.37629  | -1.46705 | 0.28467  |
| C  | 5.20272  | -1.69678 | 1.39110  |
| C  | 4.72987  | -1.46042 | 2.67191  |
| C  | 3.42060  | -1.02582 | 2.82474  |
| Mn | 1.78526  | -0.32033 | -1.07395 |
| C  | 2.08884  | 1.61028  | -0.27494 |
| O  | 1.10723  | 2.45191  | -0.29565 |
| C  | 4.92188  | -1.74831 | -1.08330 |
| C  | -6.41226 | -1.54330 | -0.20289 |
| C  | -4.36139 | 0.71522  | -0.91443 |
| C  | 3.01715  | 0.24733  | -2.23145 |
| O  | 3.74203  | 0.70396  | -3.00710 |
| C  | 1.56370  | -2.01254 | -1.70520 |
| O  | 1.43191  | -3.04876 | -2.19638 |
| C  | 0.67054  | 0.33595  | -2.28634 |
| O  | 0.03575  | 0.76262  | -3.15943 |
| O  | 3.15090  | 1.86907  | 0.29786  |
| O  | -1.15921 | 2.73601  | -1.31336 |
| O  | -1.40454 | 5.45308  | -1.21381 |
| O  | -2.64909 | 2.78154  | 1.00939  |
| O  | 0.01913  | 3.24643  | 2.01864  |
| O  | -1.72677 | 5.32148  | 1.52863  |
| H  | -1.80351 | 0.44639  | -1.06728 |
| H  | -1.01661 | -1.12937 | -1.30720 |
| H  | 3.00890  | -0.87110 | 3.82054  |
| H  | -2.56026 | 0.11652  | 1.83994  |
| H  | 1.19165  | -0.07481 | 3.91459  |
| H  | -1.25579 | 0.37427  | 3.96190  |
| H  | 6.21588  | -2.06699 | 1.22786  |
| H  | 5.36352  | -1.63183 | 3.54413  |
| C  | -5.00100 | -4.05150 | 0.53428  |
| C  | -1.75449 | -3.38636 | 0.27429  |
| H  | -6.80577 | -1.86782 | 0.76830  |

|   |          |          |          |
|---|----------|----------|----------|
| H | -6.81841 | -2.18505 | -0.99571 |
| H | -6.71891 | -0.50894 | -0.38137 |
| H | 5.78640  | -2.42096 | -1.01051 |
| H | 4.17044  | -2.20854 | -1.73601 |
| H | 5.26444  | -0.82044 | -1.56331 |
| H | -0.21286 | 2.52461  | -0.96090 |
| H | -2.20798 | 2.71380  | 0.13976  |
| H | -2.55928 | 3.73520  | 1.22246  |
| H | -1.27176 | 4.48463  | -1.32142 |
| H | -2.28812 | 5.60202  | -1.57168 |
| H | 0.55770  | 3.03387  | 1.21556  |
| H | -0.80262 | 2.75654  | 1.84743  |
| H | -0.95888 | 4.76015  | 1.76903  |
| H | -1.57892 | 5.50270  | 0.57728  |
| H | -1.19799 | 2.37383  | -2.20582 |
| H | -3.88513 | 0.91971  | -1.88450 |
| H | -5.43710 | 0.88780  | -1.01934 |
| H | -3.95849 | 1.42472  | -0.17419 |
| H | -2.06198 | -4.42569 | 0.44289  |
| H | -1.07297 | -3.36686 | -0.58925 |
| H | -1.18900 | -3.04900 | 1.15668  |
| H | -5.60066 | -3.89759 | 1.44457  |
| H | -5.67990 | -4.38611 | -0.26470 |
| H | -4.28008 | -4.85427 | 0.73171  |

### 3<sub>C2</sub>(TS2)

|                  |   |                                 |
|------------------|---|---------------------------------|
| Energy           | = | -3016.852283                    |
| Enthalpy 0K      | = | -3016.290208                    |
| Enthalpy 298K    | = | -3016.245784                    |
| Free Energy 298K | = | -3016.367229                    |
| Nimag            | = | 1 (-668.8811 cm <sup>-1</sup> ) |

|    |          |          |          |
|----|----------|----------|----------|
| C  | -4.13416 | -0.39308 | -0.46537 |
| N  | -2.97978 | -1.05118 | -0.28003 |
| C  | -3.23502 | -2.33888 | 0.17752  |
| C  | -4.59153 | -2.44848 | 0.27620  |
| N  | -5.12342 | -1.22803 | -0.12834 |
| C  | -1.65067 | -0.52646 | -0.53746 |
| C  | -0.85821 | -0.28871 | 0.72556  |
| N  | 0.47808  | -0.40224 | 0.66997  |
| C  | 1.18092  | -0.29578 | 1.81761  |
| C  | 0.57366  | 0.02604  | 3.02936  |
| C  | -0.79937 | 0.21541  | 3.06935  |
| C  | -1.52732 | 0.03092  | 1.90591  |
| C  | 2.62236  | -0.62950 | 1.73138  |
| N  | 3.05898  | -1.04540 | 0.52578  |
| C  | 4.30938  | -1.52639 | 0.41269  |
| C  | 5.18428  | -1.52387 | 1.50610  |
| C  | 4.76464  | -1.02331 | 2.72710  |
| C  | 3.45252  | -0.58495 | 2.84889  |
| Mn | 1.72202  | -0.51728 | -1.05464 |
| C  | 2.26731  | 1.43725  | -0.56231 |
| O  | 1.37596  | 2.41183  | -0.53382 |
| C  | 4.80113  | -2.08171 | -0.89022 |
| C  | -6.55240 | -0.96230 | -0.16331 |
| C  | -4.24051 | 1.00442  | -0.94798 |

|   |          |          |          |
|---|----------|----------|----------|
| C | 2.93875  | -0.30120 | -2.34597 |
| O | 3.64848  | -0.07532 | -3.22652 |
| C | 1.36674  | -2.27344 | -1.39929 |
| O | 1.16749  | -3.37020 | -1.69002 |
| C | 0.61837  | 0.03379  | -2.33762 |
| O | 0.00469  | 0.35269  | -3.26644 |
| O | 3.41531  | 1.68968  | -0.20496 |
| O | -0.87628 | 2.49669  | -1.32721 |
| O | -1.00734 | 5.15717  | -1.49704 |
| O | -2.29450 | 2.87680  | 0.90611  |
| O | 0.35961  | 3.21218  | 1.88159  |
| O | -1.21927 | 5.41435  | 1.22644  |
| H | -1.73461 | 0.42906  | -1.07233 |
| H | -1.12596 | -1.24107 | -1.18007 |
| H | 3.08693  | -0.22010 | 3.80669  |
| H | -2.61057 | 0.14170  | 1.90285  |
| H | 1.16141  | 0.12377  | 3.93960  |
| H | -1.29630 | 0.48549  | 4.00247  |
| H | 6.19401  | -1.91684 | 1.37815  |
| H | 5.44061  | -0.99461 | 3.58378  |
| C | -5.45320 | -3.57985 | 0.70910  |
| C | -2.14801 | -3.31229 | 0.46581  |
| H | -6.97381 | -1.10149 | 0.84042  |
| H | -7.03769 | -1.65387 | -0.86395 |
| H | -6.73578 | 0.06537  | -0.48813 |
| H | 5.61983  | -2.79018 | -0.70752 |
| H | 4.00609  | -2.59626 | -1.44259 |
| H | 5.19848  | -1.27917 | -1.52827 |
| H | 0.29243  | 2.32573  | -0.97300 |
| H | -1.85336 | 2.70214  | 0.03972  |
| H | -2.16779 | 3.83958  | 1.02910  |
| H | -0.91541 | 4.16631  | -1.48144 |
| H | -1.91065 | 5.29227  | -1.80699 |
| H | 0.86103  | 2.98186  | 1.06966  |
| H | -0.51101 | 2.80829  | 1.71127  |
| H | -0.50487 | 4.81619  | 1.52530  |
| H | -1.08437 | 5.45077  | 0.25467  |
| H | -1.01199 | 2.16159  | -2.21866 |
| H | -3.75693 | 1.10112  | -1.93097 |
| H | -5.28687 | 1.30955  | -1.04889 |
| H | -3.73780 | 1.68868  | -0.24546 |
| H | -2.57721 | -4.29025 | 0.71591  |
| H | -1.48740 | -3.43962 | -0.40481 |
| H | -1.52775 | -2.98314 | 1.31373  |
| H | -6.05156 | -3.30909 | 1.59249  |
| H | -6.14783 | -3.88044 | -0.08996 |
| H | -4.83222 | -4.44604 | 0.96826  |

### 3<sub>C2</sub>(I4)

|                  |   |                               |
|------------------|---|-------------------------------|
| Energy           | = | -3016.853280                  |
| Enthalpy 0K      | = | -3016.287767                  |
| Enthalpy 298K    | = | -3016.243250                  |
| Free Energy 298K | = | -3016.364666                  |
| Nimag            | = | 0 (13.9278 cm <sup>-1</sup> ) |

|   |          |          |          |
|---|----------|----------|----------|
| C | -4.14249 | -0.34885 | -0.45404 |
|---|----------|----------|----------|



|    |          |          |          |
|----|----------|----------|----------|
| N  | -2.99082 | -1.01065 | -0.26532 |
| C  | -3.25328 | -2.30399 | 0.17330  |
| C  | -4.61071 | -2.41195 | 0.25900  |
| N  | -5.13647 | -1.18585 | -0.13599 |
| C  | -1.65847 | -0.48802 | -0.51153 |
| C  | -0.85797 | -0.29411 | 0.75248  |
| N  | 0.47892  | -0.39548 | 0.68262  |
| C  | 1.19092  | -0.31298 | 1.82697  |
| C  | 0.59136  | -0.03401 | 3.05279  |
| C  | -0.78332 | 0.13855  | 3.11040  |
| C  | -1.51907 | -0.01678 | 1.94825  |
| C  | 2.63479  | -0.63247 | 1.72327  |
| N  | 3.06130  | -1.04774 | 0.51358  |
| C  | 4.31230  | -1.52438 | 0.38856  |
| C  | 5.19942  | -1.51283 | 1.47199  |
| C  | 4.79166  | -1.00700 | 2.69469  |
| C  | 3.47822  | -0.57644 | 2.83010  |
| Mn | 1.71591  | -0.50032 | -1.05447 |
| C  | 2.30052  | 1.43090  | -0.56803 |
| O  | 1.43007  | 2.45461  | -0.55674 |
| C  | 4.79166  | -2.08548 | -0.91643 |
| C  | -6.56430 | -0.91622 | -0.18116 |
| C  | -4.24424 | 1.05197  | -0.92606 |
| C  | 2.91947  | -0.32118 | -2.36570 |
| O  | 3.61913  | -0.11717 | -3.25842 |
| C  | 1.34019  | -2.25713 | -1.38582 |
| O  | 1.13346  | -3.35699 | -1.65350 |
| C  | 0.59875  | 0.04800  | -2.33824 |
| O  | -0.01218 | 0.33977  | -3.27459 |
| O  | 3.43874  | 1.68988  | -0.20483 |
| O  | -0.93501 | 2.47199  | -1.32697 |
| O  | -0.94129 | 5.09443  | -1.47746 |
| O  | -2.25418 | 2.82775  | 0.90283  |
| O  | 0.34242  | 3.14383  | 1.91810  |
| O  | -1.19886 | 5.38796  | 1.22788  |
| H  | -1.72536 | 0.49052  | -1.01121 |
| H  | -1.14359 | -1.18778 | -1.17785 |
| H  | 3.12209  | -0.20741 | 3.78990  |
| H  | -2.60332 | 0.08269  | 1.95725  |
| H  | 1.18605  | 0.03917  | 3.96077  |
| H  | -1.27483 | 0.37290  | 4.05600  |
| H  | 6.20934  | -1.90200 | 1.33442  |
| H  | 5.47783  | -0.96854 | 3.54281  |
| C  | -5.47871 | -3.54633 | 0.67097  |
| C  | -2.17258 | -3.28580 | 0.45718  |
| H  | -6.99448 | -1.05765 | 0.81857  |
| H  | -7.04586 | -1.60406 | -0.88803 |
| H  | -6.74210 | 0.11296  | -0.50467 |
| H  | 5.60794  | -2.79755 | -0.73697 |
| H  | 3.99083  | -2.59889 | -1.46150 |
| H  | 5.18989  | -1.28710 | -1.55914 |
| H  | 0.47589  | 2.29535  | -0.93747 |
| H  | -1.82768 | 2.66733  | 0.01359  |
| H  | -2.15754 | 3.79293  | 1.02273  |
| H  | -0.89436 | 4.08980  | -1.46306 |
| H  | -1.83338 | 5.26858  | -1.79938 |
| H  | 0.85838  | 2.95777  | 1.10998  |

|   |          |          |          |
|---|----------|----------|----------|
| H | -0.53437 | 2.77077  | 1.69917  |
| H | -0.50333 | 4.78315  | 1.55196  |
| H | -1.04760 | 5.39534  | 0.25596  |
| H | -1.17060 | 2.16495  | -2.20754 |
| H | -3.77170 | 1.15162  | -1.91407 |
| H | -5.28992 | 1.36402  | -1.01130 |
| H | -3.72509 | 1.72659  | -0.22580 |
| H | -2.60768 | -4.26809 | 0.67858  |
| H | -1.49942 | -3.39551 | -0.40603 |
| H | -1.56423 | -2.97782 | 1.32148  |
| H | -6.08575 | -3.28376 | 1.55091  |
| H | -6.16559 | -3.83733 | -0.13829 |
| H | -4.86205 | -4.41635 | 0.92768  |

### **3<sub>C2</sub><sup>+</sup>(15)**

|                  |   |                               |
|------------------|---|-------------------------------|
| Energy           | = | -2635.523370                  |
| Enthalpy 0K      | = | -2635.074058                  |
| Enthalpy 298K    | = | -2635.040662                  |
| Free Energy 298K | = | -2635.137993                  |
| Nimag            | = | 0 (19.3063 cm <sup>-1</sup> ) |

|    |          |          |          |
|----|----------|----------|----------|
| C  | -3.61503 | 0.14487  | 1.18974  |
| N  | -3.14683 | -0.28380 | 0.00743  |
| C  | -4.20145 | -0.45436 | -0.88394 |
| C  | -5.33745 | -0.11941 | -0.20389 |
| N  | -4.94152 | 0.24819  | 1.07615  |
| C  | -1.74619 | -0.51502 | -0.30160 |
| C  | -0.98545 | 0.75679  | -0.60125 |
| N  | 0.34725  | 0.74197  | -0.44033 |
| C  | 1.02664  | 1.89928  | -0.56081 |
| C  | 0.40946  | 3.07767  | -0.98298 |
| C  | -0.95458 | 3.07199  | -1.23148 |
| C  | -1.66779 | 1.90445  | -1.00256 |
| Mn | 1.66093  | -0.94928 | -0.33496 |
| C  | 1.15696  | -1.14180 | 1.63588  |
| O  | 1.81052  | -2.11030 | 2.34073  |
| C  | 2.45019  | 1.86947  | -0.14045 |
| N  | 2.94685  | 0.66572  | 0.22192  |
| C  | 4.18501  | 0.60486  | 0.75183  |
| C  | 4.97701  | 1.75395  | 0.86922  |
| C  | 4.49155  | 2.97942  | 0.44816  |
| C  | 3.19739  | 3.04161  | -0.05105 |
| C  | 4.74480  | -0.69708 | 1.23422  |
| C  | -3.99747 | -0.91513 | -2.28295 |
| C  | -5.85777 | 0.67769  | 2.11848  |
| C  | -6.76528 | -0.10775 | -0.61708 |
| C  | -2.81032 | 0.47636  | 2.38942  |
| C  | 2.83932  | -2.30418 | -0.27259 |
| O  | 3.49754  | -3.24707 | -0.30867 |
| C  | 0.52992  | -2.27718 | -0.72958 |
| O  | -0.09784 | -3.21561 | -0.96493 |
| C  | 2.06236  | -0.67178 | -2.10643 |
| O  | 2.30212  | -0.55291 | -3.22130 |
| O  | 0.33643  | -0.48289 | 2.25765  |
| H  | 0.98116  | 3.99399  | -1.11551 |
| H  | -1.46015 | 3.97591  | -1.57494 |

|   |          |          |          |
|---|----------|----------|----------|
| H | 2.77624  | 3.99979  | -0.34778 |
| H | 5.97530  | 1.66461  | 1.29958  |
| H | -2.74897 | 1.88111  | -1.13962 |
| H | 5.10015  | 3.88204  | 0.52596  |
| H | 3.98657  | -1.28527 | 1.76570  |
| H | 5.12357  | -1.29162 | 0.38991  |
| H | 5.59029  | -0.51130 | 1.90897  |
| H | -1.70946 | -1.19178 | -1.16291 |
| H | -1.27612 | -1.02012 | 0.54904  |
| H | -3.29570 | -0.25815 | -2.81896 |
| H | -3.59744 | -1.94044 | -2.31344 |
| H | -4.95239 | -0.90672 | -2.82243 |
| H | -7.19635 | 0.90094  | -0.52561 |
| H | -6.86035 | -0.42895 | -1.66133 |
| H | -7.36390 | -0.78783 | 0.00797  |
| H | -1.75280 | 0.21909  | 2.24492  |
| H | -2.88427 | 1.55318  | 2.60409  |
| H | -3.18690 | -0.07419 | 3.26337  |
| H | -6.41888 | 1.55596  | 1.77439  |
| H | -6.55729 | -0.13511 | 2.35301  |
| H | -5.29471 | 0.94100  | 3.01916  |
| H | 1.47792  | -2.06670 | 3.25644  |

### 3<sub>C5</sub>(I3)

|                  |   |                               |
|------------------|---|-------------------------------|
| Energy           | = | -3016.854393                  |
| Enthalpy 0K      | = | -3016.287908                  |
| Enthalpy 298K    | = | -3016.243113                  |
| Free Energy 298K | = | -3016.364555                  |
| Nimag            | = | 0 (22.7018 cm <sup>-1</sup> ) |

|    |          |          |          |
|----|----------|----------|----------|
| C  | 3.37763  | -1.03284 | 2.83981  |
| C  | 2.61378  | -0.82526 | 1.69284  |
| N  | 3.09930  | -1.03198 | 0.45281  |
| C  | 4.35102  | -1.50600 | 0.31236  |
| C  | 5.16677  | -1.73053 | 1.42783  |
| C  | 4.68522  | -1.47774 | 2.70216  |
| C  | 1.18652  | -0.44107 | 1.77391  |
| N  | 0.50805  | -0.46567 | 0.60727  |
| C  | -0.82447 | -0.31712 | 0.63958  |
| C  | -1.50930 | -0.01337 | 1.81521  |
| C  | -0.79812 | 0.12033  | 2.99689  |
| C  | 0.56697  | -0.12817 | 2.98144  |
| C  | -1.60570 | -0.52295 | -0.63777 |
| N  | -2.88098 | -1.18276 | -0.40032 |
| C  | -4.13822 | -0.60772 | -0.54585 |
| C  | -5.04279 | -1.57249 | -0.20157 |
| N  | -4.31172 | -2.70202 | 0.14497  |
| C  | -3.00701 | -2.45337 | 0.01144  |
| C  | -4.33732 | 0.79609  | -0.99347 |
| C  | -1.89464 | -3.38997 | 0.30239  |
| C  | -4.90529 | -3.95522 | 0.57997  |
| C  | -6.52867 | -1.55336 | -0.16155 |
| Mn | 1.78508  | -0.34199 | -1.07789 |
| C  | 0.68688  | 0.33189  | -2.29590 |
| O  | 0.06173  | 0.77083  | -3.16976 |
| C  | 4.90604  | -1.80447 | -1.04812 |

|   |          |          |          |
|---|----------|----------|----------|
| C | 2.11840  | 1.58524  | -0.28311 |
| O | 3.19003  | 1.83265  | 0.27714  |
| C | 3.03236  | 0.19925  | -2.23190 |
| O | 3.76814  | 0.63836  | -3.00728 |
| C | 1.54816  | -2.03276 | -1.70803 |
| O | 1.41222  | -3.06839 | -2.19925 |
| O | 1.14635  | 2.43789  | -0.29380 |
| O | -1.12173 | 2.73922  | -1.30176 |
| O | 0.08948  | 3.24438  | 2.03269  |
| O | -1.31174 | 5.46047  | -1.21211 |
| O | -1.61096 | 5.35696  | 1.53369  |
| O | -2.58690 | 2.82692  | 1.03816  |
| H | -1.80698 | 0.44827  | -1.10546 |
| H | -1.02519 | -1.12873 | -1.34148 |
| H | 2.95929  | -0.86451 | 3.83058  |
| H | -2.58827 | 0.13600  | 1.79093  |
| H | 1.14224  | -0.06883 | 3.90347  |
| H | -1.30286 | 0.39416  | 3.92468  |
| H | 6.17860  | -2.10936 | 1.27658  |
| H | 5.31061  | -1.64420 | 3.58128  |
| H | -6.90171 | -1.72259 | 0.86038  |
| H | -6.95403 | -2.33451 | -0.80983 |
| H | -6.90155 | -0.58073 | -0.50487 |
| H | 5.76027  | -2.48866 | -0.96206 |
| H | 4.15473  | -2.25854 | -1.70518 |
| H | 5.26680  | -0.88473 | -1.53053 |
| H | -0.17591 | 2.51922  | -0.95295 |
| H | -2.15879 | 2.73731  | 0.16439  |
| H | -2.47650 | 3.78133  | 1.23572  |
| H | -1.20133 | 4.48844  | -1.31413 |
| H | -2.19770 | 5.62523  | -1.55695 |
| H | 0.61646  | 3.02356  | 1.22431  |
| H | -0.74513 | 2.77473  | 1.86523  |
| H | -0.85586 | 4.77924  | 1.77527  |
| H | -1.46442 | 5.52662  | 0.58007  |
| H | -1.16678 | 2.38146  | -2.19563 |
| H | -3.88490 | 0.96744  | -1.98235 |
| H | -5.41097 | 1.00812  | -1.07204 |
| H | -3.89670 | 1.51088  | -0.28146 |
| H | -2.13226 | -4.39765 | -0.06256 |
| H | -0.96970 | -3.05991 | -0.18497 |
| H | -1.71367 | -3.44375 | 1.38704  |
| H | -5.63073 | -3.75432 | 1.37778  |
| H | -5.41300 | -4.44168 | -0.26349 |
| H | -4.12566 | -4.61721 | 0.96938  |

### 3<sub>C5</sub>(TS2)

|                  |   |                                 |
|------------------|---|---------------------------------|
| Energy           | = | -3016.851483                    |
| Enthalpy 0K      | = | -3016.289779                    |
| Enthalpy 298K    | = | -3016.245182                    |
| Free Energy 298K | = | -3016.366589                    |
| Nimag            | = | 1 (-628.0548 cm <sup>-1</sup> ) |

|   |         |          |         |
|---|---------|----------|---------|
| C | 3.42273 | -0.35434 | 2.85023 |
| C | 2.57499 | -0.52769 | 1.75923 |
| N | 2.98711 | -1.10029 | 0.61045 |

|    |          |          |          |
|----|----------|----------|----------|
| C  | 4.22451  | -1.62027 | 0.54527  |
| C  | 5.11617  | -1.49455 | 1.61799  |
| C  | 4.72563  | -0.82902 | 2.76775  |
| C  | 1.13968  | -0.16383 | 1.81881  |
| N  | 0.43220  | -0.35093 | 0.68532  |
| C  | -0.90332 | -0.21441 | 0.73440  |
| C  | -1.56462 | 0.19139  | 1.89206  |
| C  | -0.83026 | 0.45519  | 3.03664  |
| C  | 0.54121  | 0.25831  | 3.00440  |
| C  | -1.70070 | -0.51596 | -0.51262 |
| N  | -3.05377 | -0.96579 | -0.23284 |
| C  | -4.20915 | -0.20389 | -0.35777 |
| C  | -5.24515 | -1.02114 | -0.00394 |
| N  | -4.69185 | -2.25386 | 0.32402  |
| C  | -3.36497 | -2.20420 | 0.17890  |
| C  | -4.19329 | 1.21637  | -0.79666 |
| C  | -2.38718 | -3.30130 | 0.37969  |
| C  | -5.48503 | -3.40360 | 0.72500  |
| C  | -6.70978 | -0.77474 | 0.05925  |
| Mn | 1.66950  | -0.67686 | -1.01870 |
| C  | 0.59616  | -0.15382 | -2.33896 |
| O  | -0.00057 | 0.14943  | -3.28346 |
| C  | 4.68032  | -2.35515 | -0.67923 |
| C  | 2.34123  | 1.27659  | -0.72384 |
| O  | 3.51843  | 1.49120  | -0.44552 |
| C  | 2.88387  | -0.67607 | -2.33046 |
| O  | 3.59506  | -0.59423 | -3.23447 |
| C  | 1.20961  | -2.43467 | -1.19883 |
| O  | 0.94619  | -3.53963 | -1.38983 |
| O  | 1.50830  | 2.30256  | -0.73990 |
| O  | -0.78183 | 2.42625  | -1.41527 |
| O  | -0.78420 | 5.06410  | -1.79403 |
| O  | -1.99284 | 3.08846  | 0.88310  |
| O  | 0.71621  | 3.33991  | 1.66852  |
| O  | -0.76102 | 5.58042  | 0.89916  |
| H  | -1.75443 | 0.40509  | -1.10788 |
| H  | -1.19870 | -1.28349 | -1.10927 |
| H  | 3.07866  | 0.14188  | 3.75583  |
| H  | -2.64784 | 0.30628  | 1.88931  |
| H  | 1.13503  | 0.42002  | 3.90153  |
| H  | -1.32222 | 0.79500  | 3.94937  |
| H  | 6.11610  | -1.92202 | 1.52993  |
| H  | 5.41659  | -0.70008 | 3.60296  |
| H  | -7.25871 | -1.46903 | -0.59501 |
| H  | -6.93219 | 0.24945  | -0.26416 |
| H  | -7.09194 | -0.90242 | 1.08369  |
| H  | 5.46877  | -3.07115 | -0.41145 |
| H  | 3.85773  | -2.89884 | -1.15867 |
| H  | 5.10739  | -1.65784 | -1.41430 |
| H  | 0.40510  | 2.23086  | -1.10669 |
| H  | -1.64639 | 2.80027  | 0.00497  |
| H  | -1.80687 | 4.04883  | 0.89387  |
| H  | -0.74499 | 4.07331  | -1.69745 |
| H  | -1.70292 | 5.22739  | -2.03813 |
| H  | 1.14495  | 3.02124  | 0.84525  |
| H  | -0.18935 | 2.98778  | 1.57933  |
| H  | -0.06824 | 4.96364  | 1.21025  |

|   |          |          |          |
|---|----------|----------|----------|
| H | -0.69447 | 5.51631  | -0.07831 |
| H | -0.97229 | 2.04690  | -2.27849 |
| H | -3.78235 | 1.31292  | -1.81358 |
| H | -5.21733 | 1.61025  | -0.80560 |
| H | -3.58609 | 1.84212  | -0.12427 |
| H | -2.76783 | -4.04563 | 1.08814  |
| H | -2.17933 | -3.80394 | -0.57740 |
| H | -1.44155 | -2.90682 | 0.77308  |
| H | -6.11351 | -3.13190 | 1.58226  |
| H | -6.12200 | -3.72164 | -0.11068 |
| H | -4.82778 | -4.23005 | 1.01005  |

### 3c5 (14)

|                  |   |                               |
|------------------|---|-------------------------------|
| Energy           | = | -3016.852645                  |
| Enthalpy 0K      | = | -3016.287332                  |
| Enthalpy 298K    | = | -3016.242666                  |
| Free Energy 298K | = | -3016.364116                  |
| Nimag            | = | 0 (18.0275 cm <sup>-1</sup> ) |

|    |          |          |          |
|----|----------|----------|----------|
| C  | 3.42810  | -0.60576 | 2.84540  |
| C  | 2.59452  | -0.65537 | 1.73090  |
| N  | 3.02516  | -1.08675 | 0.52827  |
| C  | 4.26860  | -1.58609 | 0.41876  |
| C  | 5.14537  | -1.58234 | 1.51070  |
| C  | 4.73508  | -1.06013 | 2.72565  |
| C  | 1.15540  | -0.31088 | 1.81792  |
| N  | 0.45416  | -0.38908 | 0.66673  |
| C  | -0.88181 | -0.26865 | 0.72235  |
| C  | -1.55106 | 0.02508  | 1.90991  |
| C  | -0.82466 | 0.17813  | 3.07841  |
| C  | 0.54785  | -0.01441 | 3.03576  |
| C  | -1.67648 | -0.45859 | -0.54599 |
| N  | -3.01227 | -0.97962 | -0.30486 |
| C  | -4.20298 | -0.28357 | -0.47928 |
| C  | -5.20533 | -1.14429 | -0.12953 |
| N  | -4.59715 | -2.33512 | 0.24818  |
| C  | -3.27241 | -2.22267 | 0.12740  |
| C  | -4.25120 | 1.12250  | -0.95964 |
| C  | -2.26662 | -3.26375 | 0.44973  |
| C  | -5.31813 | -3.51794 | 0.68805  |
| C  | -6.68206 | -0.97301 | -0.11176 |
| Mn | 1.70711  | -0.52077 | -1.05629 |
| C  | 0.61288  | 0.05706  | -2.34661 |
| O  | 0.01433  | 0.37002  | -3.28397 |
| C  | 4.74920  | -2.16538 | -0.87766 |
| C  | 2.32938  | 1.39949  | -0.57126 |
| O  | 3.47459  | 1.63529  | -0.21340 |
| C  | 2.92511  | -0.37447 | -2.35868 |
| O  | 3.63577  | -0.19209 | -3.24729 |
| C  | 1.29567  | -2.26820 | -1.39108 |
| O  | 1.06300  | -3.36248 | -1.66166 |
| O  | 1.47924  | 2.43884  | -0.55713 |
| O  | -0.88602 | 2.49385  | -1.31027 |
| O  | -2.17410 | 2.90756  | 0.93609  |
| O  | -0.84532 | 5.11162  | -1.50021 |
| O  | -1.05873 | 5.45592  | 1.20205  |

|   |          |          |          |
|---|----------|----------|----------|
| O | 0.43395  | 3.18591  | 1.91940  |
| H | -1.75344 | 0.52349  | -1.03546 |
| H | -1.15734 | -1.14344 | -1.22332 |
| H | 3.06917  | -0.22325 | 3.79888  |
| H | -2.63377 | 0.14372  | 1.90683  |
| H | 1.13456  | 0.05663  | 3.94909  |
| H | -1.32213 | 0.42723  | 4.01710  |
| H | 6.14951  | -1.99026 | 1.38573  |
| H | 5.41382  | -1.02731 | 3.57997  |
| H | -7.08318 | -1.07922 | 0.90803  |
| H | -7.17711 | -1.72140 | -0.74913 |
| H | -6.94903 | 0.02433  | -0.48209 |
| H | 5.55155  | -2.89005 | -0.68621 |
| H | 3.94362  | -2.66886 | -1.42505 |
| H | 5.16604  | -1.37896 | -1.52327 |
| H | 0.51641  | 2.29705  | -0.93054 |
| H | -1.77017 | 2.71665  | 0.04370  |
| H | -2.05572 | 3.87284  | 1.02926  |
| H | -0.81819 | 4.10629  | -1.46775 |
| H | -1.73879 | 5.29768  | -1.81146 |
| H | 0.93694  | 2.97608  | 1.10890  |
| H | -0.45518 | 2.83485  | 1.71201  |
| H | -0.37556 | 4.83867  | 1.52873  |
| H | -0.91988 | 5.44232  | 0.22839  |
| H | -1.13016 | 2.18587  | -2.18811 |
| H | -3.80650 | 1.21554  | -1.96234 |
| H | -5.29504 | 1.45534  | -1.01841 |
| H | -3.70661 | 1.79601  | -0.27948 |
| H | -2.59935 | -4.24633 | 0.09043  |
| H | -1.30433 | -3.03445 | -0.02258 |
| H | -2.11229 | -3.32316 | 1.53818  |
| H | -6.06820 | -3.22728 | 1.43339  |
| H | -5.81632 | -3.99397 | -0.16715 |
| H | -4.62058 | -4.22553 | 1.14715  |

### 1<sub>c2</sub>(I5-R)

|                  |                                 |
|------------------|---------------------------------|
| Energy           | = -2517.764879                  |
| Enthalpy 0K      | = -2517.402715                  |
| Enthalpy 298K    | = -2517.373983                  |
| Free Energy 298K | = -2517.461871                  |
| Nimag            | = 0 (23.2779 cm <sup>-1</sup> ) |

|   |          |          |          |
|---|----------|----------|----------|
| N | -2.44376 | 0.12460  | -0.06956 |
| C | -2.22526 | 1.45765  | 0.22577  |
| C | -3.29148 | 2.26191  | 0.72905  |
| C | -4.55465 | 1.73866  | 0.82256  |
| C | -4.78081 | 0.41368  | 0.39860  |
| C | -3.70203 | -0.35780 | -0.03018 |
| C | -0.93192 | 1.97762  | -0.05098 |
| N | 0.00138  | 1.10554  | -0.59594 |
| C | 1.15382  | 1.62225  | -1.05872 |
| C | 1.50160  | 2.96159  | -0.94352 |
| C | 0.61546  | 3.83646  | -0.27133 |
| C | -0.58593 | 3.34831  | 0.16305  |
| C | 2.16656  | 0.71784  | -1.71792 |
| N | 3.23820  | 0.33627  | -0.79275 |

|    |          |          |          |
|----|----------|----------|----------|
| C  | 4.51306  | -0.02534 | -1.16639 |
| C  | 5.17337  | -0.37584 | -0.02892 |
| N  | 4.28386  | -0.22389 | 1.01139  |
| C  | 3.12062  | 0.20818  | 0.52958  |
| C  | 4.56373  | -0.49607 | 2.41323  |
| Mn | -0.61438 | -0.91279 | -0.32479 |
| C  | -1.19105 | -2.54681 | 0.12873  |
| O  | -1.42966 | -3.63243 | 0.43600  |
| C  | -3.97420 | -1.77511 | -0.45053 |
| C  | -0.94291 | -1.11523 | -2.11192 |
| O  | -1.13853 | -1.25950 | -3.23494 |
| C  | 0.95777  | -1.75463 | -0.40588 |
| O  | 1.90484  | -2.41867 | -0.42598 |
| C  | -0.28969 | -0.52980 | 1.67040  |
| O  | 0.66173  | 0.04810  | 2.19154  |
| O  | -1.25843 | -0.95090 | 2.52379  |
| H  | 1.70246  | -0.18889 | -2.12211 |
| H  | 2.64780  | 1.24938  | -2.54732 |
| H  | -3.10788 | 3.29471  | 1.02325  |
| H  | 2.45334  | 3.31047  | -1.34683 |
| H  | -1.28913 | 4.01263  | 0.66463  |
| H  | 0.87903  | 4.88512  | -0.11596 |
| H  | -5.78136 | -0.02052 | 0.41189  |
| H  | -5.37896 | 2.34824  | 1.20114  |
| H  | 6.19442  | -0.71120 | 0.13091  |
| H  | 4.83859  | 0.00372  | -2.20250 |
| H  | 4.96026  | -1.51391 | 2.51193  |
| H  | 3.63072  | -0.40969 | 2.98079  |
| H  | 5.29713  | 0.22697  | 2.79227  |
| H  | -5.03847 | -1.89731 | -0.69285 |
| H  | -3.38270 | -2.06243 | -1.32975 |
| H  | -3.74111 | -2.47938 | 0.36096  |
| H  | 2.19909  | 0.35439  | 1.11968  |
| H  | -0.97770 | -0.67815 | 3.41642  |

### 1<sub>c2</sub>(I6-R)

|                  |                                 |
|------------------|---------------------------------|
| Energy           | = -2899.578840                  |
| Enthalpy 0K      | = -2899.087863                  |
| Enthalpy 298K    | = -2899.046292                  |
| Free Energy 298K | = -2899.162582                  |
| Nimag            | = 0 (22.1849 cm <sup>-1</sup> ) |

|   |          |          |          |
|---|----------|----------|----------|
| N | 3.11870  | -0.52859 | 0.44419  |
| C | 2.57227  | -0.51722 | 1.71417  |
| C | 3.42372  | -0.45540 | 2.85762  |
| C | 4.78345  | -0.51480 | 2.69939  |
| C | 5.31624  | -0.65730 | 1.40219  |
| C | 4.45479  | -0.64864 | 0.30703  |
| C | 1.15925  | -0.63636 | 1.81348  |
| N | 0.43733  | -0.68158 | 0.62899  |
| C | -0.86274 | -1.03398 | 0.68786  |
| C | -1.53408 | -1.28666 | 1.87216  |
| C | -0.83767 | -1.12557 | 3.09423  |
| C | 0.48850  | -0.80244 | 3.06379  |
| C | -1.61559 | -1.10431 | -0.62551 |
| N | -2.84998 | -1.87207 | -0.54914 |

|    |          |          |          |    |          |          |          |
|----|----------|----------|----------|----|----------|----------|----------|
| C  | -2.93953 | -3.24401 | -0.63758 | N  | 3.22832  | -0.42900 | 0.39198  |
| C  | -4.25324 | -3.56305 | -0.48434 | C  | 2.70730  | -0.53955 | 1.67057  |
| N  | -4.93508 | -2.37909 | -0.30139 | C  | 3.58231  | -0.56957 | 2.79687  |
| C  | -4.06891 | -1.37086 | -0.34414 | C  | 4.93760  | -0.59813 | 2.60762  |
| C  | -6.37073 | -2.25515 | -0.09607 | C  | 5.44580  | -0.61696 | 1.29057  |
| Mn | 1.64889  | -0.10899 | -1.02056 | C  | 4.56743  | -0.52106 | 0.21786  |
| C  | 2.73749  | 0.51954  | -2.30150 | C  | 1.29761  | -0.68118 | 1.78660  |
| O  | 3.31941  | 0.98596  | -3.17911 | N  | 0.55601  | -0.65967 | 0.61514  |
| C  | 5.05961  | -0.77564 | -1.06315 | C  | -0.74514 | -1.01162 | 0.67379  |
| C  | 1.71298  | -1.84613 | -1.60088 | C  | -1.39375 | -1.32627 | 1.85506  |
| O  | 1.75334  | -2.93134 | -1.97133 | C  | -0.67651 | -1.24093 | 3.07064  |
| C  | 0.39543  | 0.36618  | -2.18578 | C  | 0.65172  | -0.92538 | 3.03593  |
| O  | -0.32115 | 0.71886  | -3.02694 | C  | -1.52658 | -1.02279 | -0.62419 |
| C  | 1.70124  | 1.77987  | -0.22646 | N  | -2.67662 | -1.91569 | -0.59579 |
| O  | 2.66168  | 2.48325  | -0.01200 | C  | -2.62633 | -3.27454 | -0.81931 |
| O  | 0.46530  | 2.38582  | 0.11986  | C  | -3.89609 | -3.74311 | -0.68253 |
| O  | -1.85112 | 2.54253  | -1.32332 | N  | -4.69186 | -2.66043 | -0.37488 |
| O  | -3.86075 | 1.52999  | 0.28778  | C  | -3.93578 | -1.56737 | -0.32609 |
| O  | -2.92802 | 5.00735  | -0.64106 | C  | -6.12666 | -2.70804 | -0.13636 |
| O  | -1.61702 | 1.96382  | 2.03374  | Mn | 1.72005  | 0.07710  | -0.99125 |
| O  | -3.65344 | 3.81567  | 1.74792  | C  | 2.76666  | 0.76624  | -2.29244 |
| H  | -1.87467 | -0.09156 | -0.96140 | O  | 3.30762  | 1.24679  | -3.18459 |
| H  | -0.99798 | -1.57226 | -1.39952 | C  | 5.14489  | -0.51506 | -1.16891 |
| H  | 2.99399  | -0.36937 | 3.85508  | C  | 1.80928  | -1.62668 | -1.68330 |
| H  | -2.58533 | -1.57004 | 1.87159  | O  | 1.87987  | -2.69569 | -2.07941 |
| H  | 1.04410  | -0.70052 | 3.99548  | C  | 0.39942  | 0.61269  | -2.10460 |
| H  | -1.35487 | -1.26724 | 4.04569  | O  | -0.32476 | 0.97508  | -2.91980 |
| H  | 6.39019  | -0.75866 | 1.24061  | C  | 1.78614  | 1.82735  | -0.06535 |
| H  | 5.44410  | -0.47085 | 3.56882  | O  | 2.30784  | 2.69464  | 0.46551  |
| H  | -4.76254 | -4.52257 | -0.49477 | O  | -0.26856 | 2.59354  | -0.14130 |
| H  | -2.06433 | -3.86569 | -0.80622 | O  | -2.41776 | 2.33760  | -1.29185 |
| H  | -6.90095 | -2.63891 | -0.97662 | O  | -4.09085 | 1.23792  | 0.51802  |
| H  | -6.61612 | -1.19790 | 0.05127  | O  | -3.62512 | 4.64063  | -0.55751 |
| H  | -6.66167 | -2.82909 | 0.79237  | O  | -1.63105 | 1.99034  | 2.03726  |
| H  | 6.06398  | -1.21399 | -0.99021 | O  | -3.88329 | 3.54215  | 1.98225  |
| H  | 4.45225  | -1.40981 | -1.72236 | H  | -1.88610 | -0.00955 | -0.85738 |
| H  | 5.16800  | 0.20916  | -1.53995 | H  | -0.89353 | -1.36218 | -1.45029 |
| H  | -4.28718 | -0.30753 | -0.18621 | H  | 3.17215  | -0.58095 | 3.80593  |
| H  | -0.99901 | 2.43644  | -0.84417 | H  | -2.44629 | -1.60465 | 1.85691  |
| H  | -3.23997 | 1.86620  | -0.38627 | H  | 1.22541  | -0.88248 | 3.96086  |
| H  | -4.03208 | 2.32782  | 0.83749  | H  | -1.17743 | -1.43782 | 4.02091  |
| H  | -2.49814 | 4.20894  | -1.00470 | H  | 6.51721  | -0.69112 | 1.10096  |
| H  | -3.72817 | 5.10262  | -1.17248 | H  | 5.61574  | -0.62464 | 3.46387  |
| H  | -0.80210 | 1.91172  | 1.50934  | H  | -4.30344 | -4.74532 | -0.78275 |
| H  | -2.24580 | 1.41773  | 1.53310  | H  | -1.69625 | -3.78190 | -1.06148 |
| H  | -2.81221 | 3.38043  | 1.98807  | H  | -6.62942 | -3.12019 | -1.01998 |
| H  | -3.41333 | 4.36097  | 0.97013  | H  | -6.48692 | -1.69085 | 0.05167  |
| H  | -1.66911 | 2.25579  | -2.22827 | H  | -6.33171 | -3.34060 | 0.73633  |
| H  | 0.68925  | 3.27851  | 0.44602  | H  | 6.16791  | -0.91319 | -1.14956 |
|    |          |          |          | H  | 4.55275  | -1.12565 | -1.86388 |
|    |          |          |          | H  | 5.20271  | 0.50750  | -1.56927 |
|    |          |          |          | H  | -4.25957 | -0.55326 | -0.05367 |
|    |          |          |          | H  | -1.44326 | 2.43776  | -0.83569 |
|    |          |          |          | H  | -3.54512 | 1.61440  | -0.20773 |
|    |          |          |          | H  | -4.23534 | 2.01049  | 1.10549  |
|    |          |          |          | H  | -3.16416 | 3.85289  | -0.92995 |
|    |          |          |          | H  | -4.51753 | 4.57263  | -0.91768 |

  

|                            |   |                                 |  |
|----------------------------|---|---------------------------------|--|
| <b>1<sub>c2</sub>(TS3)</b> |   |                                 |  |
| Energy                     | = | -2899.558076                    |  |
| Enthalpy 0K                | = | -2899.071601                    |  |
| Enthalpy 298K              | = | -2899.030410                    |  |
| Free Energy 298K           | = | -2899.145966                    |  |
| Nimag                      | = | 1 (-210.5435 cm <sup>-1</sup> ) |  |

|   |          |         |          |
|---|----------|---------|----------|
| H | -1.03675 | 2.22263 | 1.26739  |
| H | -2.21102 | 1.31620 | 1.65351  |
| H | -2.99340 | 3.14608 | 2.11570  |
| H | -3.78248 | 4.05227 | 1.15226  |
| H | -2.27188 | 2.10169 | -2.21415 |
| H | -0.10214 | 3.54327 | -0.09540 |

**1<sub>C2</sub>(I7-R)**

|                  |   |                               |
|------------------|---|-------------------------------|
| Energy           | = | -2899.566929                  |
| Enthalpy 0K      | = | -2899.078544                  |
| Enthalpy 298K    | = | -2899.036763                  |
| Free Energy 298K | = | -2899.154097                  |
| Nimag            | = | 0 (18.5020 cm <sup>-1</sup> ) |

|    |          |          |          |
|----|----------|----------|----------|
| N  | 3.39004  | -0.31118 | 0.37749  |
| C  | 2.87349  | -0.49070 | 1.65201  |
| C  | 3.75554  | -0.61544 | 2.76568  |
| C  | 5.10812  | -0.66286 | 2.56217  |
| C  | 5.60779  | -0.60134 | 1.24214  |
| C  | 4.72628  | -0.41347 | 0.18519  |
| C  | 1.46130  | -0.60793 | 1.76577  |
| N  | 0.72808  | -0.55958 | 0.59064  |
| C  | -0.57626 | -0.90491 | 0.62699  |
| C  | -1.23985 | -1.20829 | 1.80259  |
| C  | -0.53788 | -1.12666 | 3.02581  |
| C  | 0.79874  | -0.84056 | 3.00797  |
| C  | -1.35270 | -0.93651 | -0.67435 |
| N  | -2.36351 | -1.98779 | -0.69230 |
| C  | -2.10505 | -3.32559 | -0.89864 |
| C  | -3.29745 | -3.97520 | -0.81796 |
| N  | -4.25652 | -3.01987 | -0.56046 |
| C  | -3.67191 | -1.82639 | -0.48816 |
| C  | -5.67910 | -3.27733 | -0.39344 |
| Mn | 1.87571  | 0.33608  | -0.93145 |
| C  | 2.91765  | 1.13048  | -2.18879 |
| O  | 3.46032  | 1.67364  | -3.03971 |
| C  | 5.29337  | -0.31043 | -1.20175 |
| C  | 1.94903  | -1.32414 | -1.78193 |
| O  | 2.00064  | -2.35572 | -2.26021 |
| C  | 0.50871  | 0.96917  | -1.95312 |
| O  | -0.24910 | 1.41756  | -2.68524 |
| C  | 1.91183  | 1.93030  | 0.09990  |
| O  | 2.06184  | 2.88966  | 0.68764  |
| O  | -0.91172 | 2.35916  | 0.55784  |
| O  | -2.79499 | 1.97017  | -1.10623 |
| O  | -4.70674 | 0.85900  | 0.20276  |
| O  | -3.91993 | 4.27680  | -0.64745 |
| O  | -2.91075 | 1.57462  | 2.29217  |
| O  | -5.04998 | 3.21944  | 1.61571  |
| H  | -1.86372 | 0.02941  | -0.84284 |
| H  | -0.68902 | -1.13610 | -1.52108 |
| H  | 3.35175  | -0.69159 | 3.77458  |
| H  | -2.29670 | -1.46941 | 1.79116  |
| H  | 1.36179  | -0.80242 | 3.93984  |
| H  | -1.05588 | -1.30373 | 3.97074  |
| H  | 6.67630  | -0.68313 | 1.04005  |

|   |          |          |          |
|---|----------|----------|----------|
| H | 5.79165  | -0.76611 | 3.40818  |
| H | -3.54876 | -5.02675 | -0.92531 |
| H | -1.09965 | -3.69193 | -1.08855 |
| H | -6.07896 | -3.72943 | -1.30962 |
| H | -6.19012 | -2.32848 | -0.19729 |
| H | -5.82952 | -3.95931 | 0.45269  |
| H | 6.31186  | -0.71976 | -1.22076 |
| H | 4.69187  | -0.86040 | -1.93804 |
| H | 5.36103  | 0.73903  | -1.52335 |
| H | -4.17522 | -0.87678 | -0.25566 |
| H | -1.60385 | 2.20835  | -0.17627 |
| H | -4.01367 | 1.27809  | -0.40064 |
| H | -5.09720 | 1.63009  | 0.65966  |
| H | -3.44615 | 3.41698  | -0.87611 |
| H | -4.64185 | 4.31170  | -1.28548 |
| H | -2.11494 | 1.85376  | 1.78852  |
| H | -3.41045 | 1.07107  | 1.62320  |
| H | -4.25795 | 2.81947  | 2.02810  |
| H | -4.67151 | 3.70469  | 0.84836  |
| H | -2.58760 | 1.84595  | -2.03770 |
| H | -0.79932 | 3.31589  | 0.58548  |

**1<sub>C2</sub><sup>+</sup>(I8)**

|                  |   |                               |
|------------------|---|-------------------------------|
| Energy           | = | -2441.875625                  |
| Enthalpy 0K      | = | -2441.528704                  |
| Enthalpy 298K    | = | -2441.501042                  |
| Free Energy 298K | = | -2441.586411                  |
| Nimag            | = | 0 (27.1961 cm <sup>-1</sup> ) |

|    |          |          |          |
|----|----------|----------|----------|
| C  | 3.20058  | 0.47513  | 0.55446  |
| N  | 3.18147  | 0.29209  | -0.76571 |
| C  | 4.31976  | -0.38808 | -1.13388 |
| C  | 5.03145  | -0.61389 | 0.00411  |
| N  | 4.31266  | -0.06752 | 1.04247  |
| C  | 2.11675  | 0.68438  | -1.69769 |
| C  | 1.08972  | 1.58452  | -1.05926 |
| N  | -0.04111 | 1.05809  | -0.52981 |
| C  | -0.99537 | 1.93372  | -0.02473 |
| C  | -0.69214 | 3.32420  | 0.09610  |
| C  | 0.48071  | 3.82325  | -0.39422 |
| C  | 1.38162  | 2.93517  | -1.03374 |
| C  | -2.27266 | 1.39503  | 0.29125  |
| N  | -2.45504 | 0.04001  | 0.07908  |
| C  | -3.70451 | -0.47868 | 0.14967  |
| C  | -4.79625 | 0.29163  | 0.53036  |
| C  | -4.60687 | 1.64638  | 0.87082  |
| C  | -3.35985 | 2.19766  | 0.74382  |
| Mn | -0.60028 | -0.93405 | -0.12035 |
| C  | -0.29480 | -0.52146 | 1.69372  |
| O  | -0.11156 | -0.28077 | 2.78837  |
| C  | -3.94266 | -1.92428 | -0.18022 |
| C  | 4.71204  | -0.07725 | 2.44277  |
| C  | -1.14982 | -2.61094 | 0.33744  |
| O  | -1.35545 | -3.69623 | 0.63585  |
| C  | -0.99362 | -1.16336 | -1.94275 |
| O  | -1.24764 | -1.26602 | -3.04518 |
| C  | 1.01817  | -1.74852 | -0.25411 |

|   |          |          |          |
|---|----------|----------|----------|
| O | 1.96720  | -2.39024 | -0.29708 |
| H | 1.67107  | -0.22656 | -2.11403 |
| H | 2.60273  | 1.21897  | -2.52266 |
| H | -3.20507 | 3.25177  | 0.96917  |
| H | 2.30672  | 3.29393  | -1.48650 |
| H | -1.40970 | 3.99379  | 0.56876  |
| H | 0.71232  | 4.88699  | -0.31212 |
| H | -5.78511 | -0.16603 | 0.57109  |
| H | -5.44841 | 2.25477  | 1.20989  |
| H | 5.98379  | -1.11166 | 0.16518  |
| H | 4.51851  | -0.65448 | -2.16821 |
| H | 5.64569  | 0.48660  | 2.55989  |
| H | 4.85904  | -1.11396 | 2.76912  |
| H | 3.92057  | 0.38902  | 3.03925  |
| H | -5.00649 | -2.08506 | -0.39804 |
| H | -3.36499 | -2.25269 | -1.05469 |
| H | -3.68742 | -2.57167 | 0.67127  |
| H | 2.43401  | 0.97721  | 1.14011  |

### 1<sub>C2</sub><sup>+</sup>(I5-P)

|                  |                                 |
|------------------|---------------------------------|
| Energy           | = -2899.483963                  |
| Enthalpy 0K      | = -2898.989047                  |
| Enthalpy 298K    | = -2898.947946                  |
| Free Energy 298K | = -2899.062628                  |
| Nimag            | = 0 (20.1175 cm <sup>-1</sup> ) |

|    |          |          |          |
|----|----------|----------|----------|
| N  | 3.07740  | -0.58440 | 0.51177  |
| C  | 2.54942  | -0.42628 | 1.74404  |
| C  | 3.33347  | -0.14682 | 2.85886  |
| C  | 4.71456  | -0.09406 | 2.70920  |
| C  | 5.25606  | -0.36993 | 1.46605  |
| C  | 4.41454  | -0.61500 | 0.37285  |
| C  | 1.08734  | -0.64440 | 1.85418  |
| N  | 0.39531  | -0.71477 | 0.69877  |
| C  | -0.90726 | -1.05087 | 0.75307  |
| C  | -1.55476 | -1.30985 | 1.95817  |
| C  | -0.85162 | -1.20086 | 3.14761  |
| C  | 0.49028  | -0.86597 | 3.09515  |
| C  | -1.67291 | -1.11830 | -0.55057 |
| N  | -2.95864 | -1.78641 | -0.44042 |
| C  | -3.15514 | -3.14963 | -0.50359 |
| C  | -4.48930 | -3.35990 | -0.34427 |
| N  | -5.07631 | -2.12251 | -0.18592 |
| C  | -4.13623 | -1.18585 | -0.24801 |
| C  | -6.49926 | -1.88677 | 0.01361  |
| Mn | 1.61315  | -0.28769 | -1.01407 |
| C  | 2.71818  | 0.18070  | -2.35534 |
| O  | 3.31362  | 0.53665  | -3.27088 |
| C  | 5.03882  | -0.92568 | -0.95317 |
| C  | 1.62401  | -2.07012 | -1.47986 |
| O  | 1.63745  | -3.16866 | -1.80205 |
| C  | 0.36827  | 0.15127  | -2.21412 |
| O  | -0.33551 | 0.47813  | -3.06951 |
| C  | 1.74945  | 1.66345  | -0.41070 |
| O  | 2.75304  | 2.30460  | -0.20491 |
| O  | 0.54994  | 2.38153  | -0.20486 |

|   |          |          |          |
|---|----------|----------|----------|
| O | -1.81734 | 2.58233  | -1.57319 |
| O | -3.71054 | 1.72930  | 0.24902  |
| O | -2.52418 | 5.12509  | -0.68298 |
| O | -1.37942 | 1.92007  | 1.87593  |
| O | -3.28553 | 3.97088  | 1.70519  |
| H | -1.85427 | -0.10032 | -0.92029 |
| H | -1.09303 | -1.66068 | -1.30522 |
| H | 2.88120  | 0.02879  | 3.83330  |
| H | -2.60696 | -1.58975 | 1.97149  |
| H | 1.07550  | -0.81085 | 4.01077  |
| H | -1.34208 | -1.38953 | 4.10377  |
| H | 6.33635  | -0.39344 | 1.31651  |
| H | 5.35585  | 0.13309  | 3.56268  |
| H | -5.07284 | -4.27625 | -0.33608 |
| H | -2.33205 | -3.84150 | -0.66056 |
| H | -7.05504 | -2.25982 | -0.85554 |
| H | -6.66794 | -0.81047 | 0.12636  |
| H | -6.82961 | -2.41035 | 0.91913  |
| H | 6.03014  | -1.37189 | -0.79848 |
| H | 4.42824  | -1.62555 | -1.53677 |
| H | 5.18397  | -0.00786 | -1.54113 |
| H | -4.27233 | -0.10513 | -0.11896 |
| H | -0.93282 | 2.43391  | -1.17664 |
| H | -3.16147 | 2.02507  | -0.50201 |
| H | -3.80675 | 2.54544  | 0.79270  |
| H | -2.25572 | 4.30501  | -1.13948 |
| H | -3.31920 | 5.40663  | -1.15249 |
| H | -0.64537 | 1.97834  | 1.24402  |
| H | -2.10598 | 1.54174  | 1.34920  |
| H | -2.48135 | 3.47626  | 1.95121  |
| H | -3.00333 | 4.49847  | 0.92815  |
| H | -1.73903 | 2.30906  | -2.49659 |
| H | 0.81302  | 3.29031  | 0.04031  |

### 1<sub>C2</sub><sup>+</sup>(TS4)

|                  |                                   |
|------------------|-----------------------------------|
| Energy           | = -2899.457959                    |
| Enthalpy 0K      | = -2898.968405                    |
| Enthalpy 298K    | = -2898.927656                    |
| Free Energy 298K | = -2899.041335                    |
| Nimag            | = 1 (-254.8620 cm <sup>-1</sup> ) |

|   |          |          |          |
|---|----------|----------|----------|
| N | 3.25632  | -0.40564 | 0.44851  |
| C | 2.75038  | -0.46868 | 1.70135  |
| C | 3.56551  | -0.45003 | 2.82899  |
| C | 4.94413  | -0.41676 | 2.66274  |
| C | 5.45689  | -0.44558 | 1.37805  |
| C | 4.59313  | -0.44170 | 0.27649  |
| C | 1.28018  | -0.64005 | 1.80849  |
| N | 0.58360  | -0.64264 | 0.65173  |
| C | -0.72153 | -0.96625 | 0.68637  |
| C | -1.37863 | -1.23946 | 1.88353  |
| C | -0.68229 | -1.16836 | 3.07785  |
| C | 0.67091  | -0.87676 | 3.03962  |
| C | -1.49380 | -1.01729 | -0.61382 |
| N | -2.63458 | -1.91807 | -0.56306 |
| C | -2.57277 | -3.28282 | -0.75163 |
| C | -3.84133 | -3.75471 | -0.61895 |

|    |          |          |          |    |          |          |          |
|----|----------|----------|----------|----|----------|----------|----------|
| N  | -4.64760 | -2.66952 | -0.34959 | C  | 2.94553  | -0.68539 | 1.58582  |
| C  | -3.90105 | -1.57093 | -0.31947 | C  | 3.78714  | -1.04706 | 2.63318  |
| C  | -6.08568 | -2.71971 | -0.12843 | C  | 5.15995  | -1.04580 | 2.42459  |
| Mn | 1.75880  | 0.04998  | -0.99074 | C  | 5.63933  | -0.71470 | 1.16936  |
| C  | 2.82200  | 0.68711  | -2.31866 | C  | 4.75186  | -0.34847 | 0.15121  |
| O  | 3.37125  | 1.12682  | -3.22178 | C  | 1.47087  | -0.77968 | 1.71361  |
| C  | 5.19365  | -0.48610 | -1.09457 | N  | 0.76051  | -0.60105 | 0.57809  |
| C  | 1.84929  | -1.68484 | -1.65501 | C  | -0.55364 | -0.88078 | 0.58472  |
| O  | 1.91924  | -2.75111 | -2.04881 | C  | -1.21640 | -1.24094 | 1.75738  |
| C  | 0.44050  | 0.56369  | -2.13454 | C  | -0.51075 | -1.31972 | 2.94529  |
| O  | -0.27867 | 0.91895  | -2.95161 | C  | 0.86030  | -1.10976 | 2.92034  |
| C  | 1.79644  | 1.82852  | -0.16315 | C  | -1.34364 | -0.81878 | -0.70427 |
| O  | 2.25001  | 2.76476  | 0.30231  | N  | -2.30980 | -1.90518 | -0.79668 |
| O  | -0.38368 | 2.40715  | -0.08479 | C  | -1.99322 | -3.22265 | -1.05324 |
| O  | -2.46991 | 2.21253  | -1.31844 | C  | -3.16415 | -3.91423 | -1.05662 |
| O  | -4.27350 | 1.27481  | 0.43370  | N  | -4.16793 | -3.00453 | -0.80190 |
| O  | -3.50139 | 4.62471  | -0.64940 | C  | -3.63252 | -1.79732 | -0.64892 |
| O  | -1.89635 | 1.85749  | 2.03113  | C  | -5.58771 | -3.31471 | -0.71559 |
| O  | -4.03137 | 3.59578  | 1.86344  | Mn | 1.89621  | 0.46516  | -0.87163 |
| H  | -1.86010 | -0.01047 | -0.86941 | C  | 2.91604  | 1.41149  | -2.05563 |
| H  | -0.85314 | -1.37295 | -1.42607 | O  | 3.43162  | 2.04972  | -2.85076 |
| H  | 3.14041  | -0.46932 | 3.82999  | C  | 5.31310  | -0.00778 | -1.19384 |
| H  | -2.43749 | -1.49376 | 1.88443  | C  | 2.00726  | -1.10066 | -1.90645 |
| H  | 1.24658  | -0.85384 | 3.96202  | O  | 2.08744  | -2.06115 | -2.50651 |
| H  | -1.18446 | -1.35482 | 4.02817  | C  | 0.51513  | 1.17078  | -1.84436 |
| H  | 6.53317  | -0.46825 | 1.20363  | O  | -0.24394 | 1.67687  | -2.53100 |
| H  | 5.60568  | -0.39521 | 3.53042  | C  | 1.87494  | 1.97595  | 0.27644  |
| H  | -4.24151 | -4.76160 | -0.69913 | O  | 1.96164  | 2.89389  | 0.93586  |
| H  | -1.63710 | -3.79007 | -0.97153 | O  | -0.99153 | 2.13528  | 0.82112  |
| H  | -6.57209 | -3.16539 | -1.00473 | O  | -2.81595 | 2.05969  | -0.93668 |
| H  | -6.45496 | -1.69924 | 0.01988  | O  | -4.88195 | 0.82851  | -0.01629 |
| H  | -6.29703 | -3.32455 | 0.76211  | O  | -3.92549 | 4.29377  | -0.14103 |
| H  | 6.21382  | -0.88610 | -1.03588 | O  | -3.15920 | 1.12057  | 2.23926  |
| H  | 4.61493  | -1.12168 | -1.77656 | O  | -5.27176 | 2.90147  | 1.78859  |
| H  | 5.26704  | 0.52414  | -1.52272 | H  | -1.89392 | 0.13931  | -0.78105 |
| H  | -4.24450 | -0.55547 | -0.07978 | H  | -0.68403 | -0.91553 | -1.57139 |
| H  | -1.48972 | 2.28735  | -0.81518 | H  | 3.38420  | -1.34583 | 3.59852  |
| H  | -3.70027 | 1.61107  | -0.29262 | H  | -2.28755 | -1.43124 | 1.74265  |
| H  | -4.43134 | 2.07371  | 0.98189  | H  | 1.44311  | -1.20757 | 3.83374  |
| H  | -3.10464 | 3.78953  | -0.99189 | H  | -1.01845 | -1.56219 | 3.88003  |
| H  | -4.36082 | 4.66635  | -1.08582 | H  | 6.70800  | -0.73675 | 0.95370  |
| H  | -1.24487 | 2.06066  | 1.30458  | H  | 5.84219  | -1.32344 | 3.22974  |
| H  | -2.56610 | 1.33056  | 1.56640  | H  | -3.37256 | -4.96764 | -1.22219 |
| H  | -3.17744 | 3.16034  | 2.07022  | H  | -0.96792 | -3.54512 | -1.21471 |
| H  | -3.83853 | 4.08665  | 1.03703  | H  | -5.93049 | -3.72527 | -1.67341 |
| H  | -2.31502 | 2.02276  | -2.24989 | H  | -6.13615 | -2.39375 | -0.49023 |
| H  | -0.24518 | 3.36036  | -0.02178 | H  | -5.75193 | -4.04811 | 0.08347  |

### 1<sub>C2</sub><sup>+</sup>(I6-P)

|                  |   |                              |
|------------------|---|------------------------------|
| Energy           | = | -2899.465454                 |
| Enthalpy 0K      | = | -2898.973703                 |
| Enthalpy 298K    | = | -2898.932246                 |
| Free Energy 298K | = | -2899.049058                 |
| Nimag            | = | 0 (8.8172 cm <sup>-1</sup> ) |

|   |         |          |         |
|---|---------|----------|---------|
| N | 3.42273 | -0.30630 | 0.37792 |
|---|---------|----------|---------|

|    |          |          |          |
|----|----------|----------|----------|
| C  | 2.94553  | -0.68539 | 1.58582  |
| C  | 3.78714  | -1.04706 | 2.63318  |
| C  | 5.15995  | -1.04580 | 2.42459  |
| C  | 5.63933  | -0.71470 | 1.16936  |
| C  | 4.75186  | -0.34847 | 0.15121  |
| C  | 1.47087  | -0.77968 | 1.71361  |
| N  | 0.76051  | -0.60105 | 0.57809  |
| C  | -0.55364 | -0.88078 | 0.58472  |
| C  | -1.21640 | -1.24094 | 1.75738  |
| C  | -0.51075 | -1.31972 | 2.94529  |
| C  | 0.86030  | -1.10976 | 2.92034  |
| C  | -1.34364 | -0.81878 | -0.70427 |
| N  | -2.30980 | -1.90518 | -0.79668 |
| C  | -1.99322 | -3.22265 | -1.05324 |
| C  | -3.16415 | -3.91423 | -1.05662 |
| N  | -4.16793 | -3.00453 | -0.80190 |
| C  | -3.63252 | -1.79732 | -0.64892 |
| C  | -5.58771 | -3.31471 | -0.71559 |
| Mn | 1.89621  | 0.46516  | -0.87163 |
| C  | 2.91604  | 1.41149  | -2.05563 |
| O  | 3.43162  | 2.04972  | -2.85076 |
| C  | 5.31310  | -0.00778 | -1.19384 |
| C  | 2.00726  | -1.10066 | -1.90645 |
| O  | 2.08744  | -2.06115 | -2.50651 |
| C  | 0.51513  | 1.17078  | -1.84436 |
| O  | -0.24394 | 1.67687  | -2.53100 |
| C  | 1.87494  | 1.97595  | 0.27644  |
| O  | 1.96164  | 2.89389  | 0.93586  |
| O  | -0.99153 | 2.13528  | 0.82112  |
| O  | -2.81595 | 2.05969  | -0.93668 |
| O  | -4.88195 | 0.82851  | -0.01629 |
| O  | -3.92549 | 4.29377  | -0.14103 |
| O  | -3.15920 | 1.12057  | 2.23926  |
| O  | -5.27176 | 2.90147  | 1.78859  |
| H  | -1.89392 | 0.13931  | -0.78105 |
| H  | -0.68403 | -0.91553 | -1.57139 |
| H  | 3.38420  | -1.34583 | 3.59852  |
| H  | -2.28755 | -1.43124 | 1.74265  |
| H  | 1.44311  | -1.20757 | 3.83374  |
| H  | -1.01845 | -1.56219 | 3.88003  |
| H  | 6.70800  | -0.73675 | 0.95370  |
| H  | 5.84219  | -1.32344 | 3.22974  |
| H  | -3.37256 | -4.96764 | -1.22219 |
| H  | -0.96792 | -3.54512 | -1.21471 |
| H  | -5.93049 | -3.72527 | -1.67341 |
| H  | -6.13615 | -2.39375 | -0.49023 |
| H  | -5.75193 | -4.04811 | 0.08347  |
| H  | 6.34406  | -0.37475 | -1.26964 |
| H  | 4.73080  | -0.45875 | -2.00782 |
| H  | 5.34440  | 1.08203  | -1.33681 |
| H  | -4.18227 | -0.87394 | -0.41091 |
| H  | -1.66130 | 2.14463  | 0.04844  |
| H  | -4.13352 | 1.31923  | -0.48142 |
| H  | -5.27998 | 1.51560  | 0.55467  |
| H  | -3.45985 | 3.47328  | -0.48906 |
| H  | -4.57238 | 4.49627  | -0.82670 |
| H  | -2.33181 | 1.47836  | 1.85204  |



|   |          |         |          |
|---|----------|---------|----------|
| H | -3.64331 | 0.80342 | 1.45417  |
| H | -4.51675 | 2.42771 | 2.18718  |
| H | -4.82758 | 3.50531 | 1.15088  |
| H | -2.58141 | 2.10253 | -1.86929 |
| H | -0.87094 | 3.06487 | 1.04552  |

**1<sub>C2</sub><sup>2+</sup>(I7-P)**

|                  |   |                               |
|------------------|---|-------------------------------|
| Energy           | = | -2441.767118                  |
| Enthalpy 0K      | = | -2441.416870                  |
| Enthalpy 298K    | = | -2441.389488                  |
| Free Energy 298K | = | -2441.474065                  |
| Nimag            | = | 0 (22.0941 cm <sup>-1</sup> ) |

|    |          |          |          |
|----|----------|----------|----------|
| C  | 3.16974  | 0.49965  | 0.64652  |
| N  | 3.18261  | 0.28220  | -0.67044 |
| C  | 4.32661  | -0.41441 | -0.99241 |
| C  | 5.00444  | -0.61763 | 0.16965  |
| N  | 4.26320  | -0.04009 | 1.17520  |
| C  | 2.16421  | 0.67707  | -1.64792 |
| C  | 1.11529  | 1.58210  | -1.05814 |
| N  | -0.03565 | 1.09144  | -0.55088 |
| C  | -0.95827 | 1.96563  | -0.09527 |
| C  | -0.72151 | 3.34178  | -0.06519 |
| C  | 0.47616  | 3.84122  | -0.54609 |
| C  | 1.39646  | 2.94633  | -1.06931 |
| C  | -2.27075 | 1.40900  | 0.31520  |
| N  | -2.44608 | 0.07778  | 0.14531  |
| C  | -3.66973 | -0.45348 | 0.35021  |
| C  | -4.72751 | 0.33977  | 0.81069  |
| C  | -4.53174 | 1.68549  | 1.05996  |
| C  | -3.28505 | 2.23411  | 0.79082  |
| Mn | -0.61303 | -0.93839 | -0.20529 |
| C  | -0.22150 | -0.68625 | 1.62218  |
| O  | 0.00615  | -0.55369 | 2.72534  |
| C  | -3.94280 | -1.90171 | 0.08850  |
| C  | 4.62694  | -0.01535 | 2.58563  |
| C  | -1.16414 | -2.65200 | 0.14149  |
| O  | -1.35668 | -3.75895 | 0.34084  |
| C  | -1.07588 | -1.06584 | -2.03305 |
| O  | -1.35734 | -1.11576 | -3.12980 |
| C  | 0.98736  | -1.78803 | -0.44346 |
| O  | 1.91322  | -2.45056 | -0.54690 |
| H  | 1.73185  | -0.22267 | -2.09806 |
| H  | 2.68241  | 1.21791  | -2.44888 |
| H  | -3.11936 | 3.29763  | 0.94482  |
| H  | 2.34107  | 3.28997  | -1.49259 |
| H  | -1.47280 | 4.02759  | 0.31912  |
| H  | 0.67866  | 4.91297  | -0.53225 |
| H  | -5.70182 | -0.12354 | 0.96914  |
| H  | -5.34229 | 2.31102  | 1.43732  |
| H  | 5.94678  | -1.12096 | 0.36832  |
| H  | 4.55023  | -0.70762 | -2.01435 |
| H  | 5.54347  | 0.57332  | 2.71526  |
| H  | 4.79093  | -1.04270 | 2.93228  |
| H  | 3.80913  | 0.44014  | 3.15392  |
| H  | -5.02475 | -2.06260 | 0.00679  |

|   |          |          |          |
|---|----------|----------|----------|
| H | -3.47811 | -2.24567 | -0.84455 |
| H | -3.58710 | -2.52259 | 0.92338  |
| H | 2.39607  | 1.02511  | 1.20222  |

**1<sub>C5</sub>(I6-R)**

|                  |   |                               |
|------------------|---|-------------------------------|
| Energy           | = | -2899.577552                  |
| Enthalpy 0K      | = | -2899.086186                  |
| Enthalpy 298K    | = | -2899.044708                  |
| Free Energy 298K | = | -2899.160519                  |
| Nimag            | = | 0 (20.2544 cm <sup>-1</sup> ) |

|    |          |          |          |
|----|----------|----------|----------|
| C  | -4.25061 | -1.01764 | -0.07559 |
| N  | -3.03934 | -1.62184 | -0.33736 |
| C  | -3.21955 | -2.94113 | -0.40147 |
| N  | -4.50419 | -3.20499 | -0.18957 |
| C  | -5.17140 | -2.01661 | 0.01706  |
| C  | -1.75636 | -0.95089 | -0.49501 |
| C  | -0.99289 | -0.77185 | 0.80151  |
| N  | 0.33037  | -0.53501 | 0.69853  |
| C  | 1.06805  | -0.40778 | 1.86700  |
| C  | 0.40165  | -0.37374 | 3.13004  |
| C  | -0.94628 | -0.57955 | 3.20134  |
| C  | -1.66929 | -0.82332 | 2.00881  |
| C  | 2.48460  | -0.41578 | 1.74833  |
| N  | 3.00993  | -0.63158 | 0.48733  |
| C  | 4.32892  | -0.88110 | 0.36094  |
| C  | 5.20284  | -0.82392 | 1.44476  |
| C  | 4.70303  | -0.47220 | 2.71516  |
| C  | 3.35535  | -0.27950 | 2.87057  |
| Mn | 1.56197  | -0.26397 | -1.01186 |
| C  | 1.78398  | 1.69341  | -0.44754 |
| O  | 2.80215  | 2.33673  | -0.33430 |
| C  | 4.89898  | -1.23245 | -0.98478 |
| H  | -6.23984 | -1.98769 | 0.21175  |
| C  | 2.68319  | 0.11474  | -2.36143 |
| O  | 3.29208  | 0.42273  | -3.28914 |
| C  | 1.47058  | -2.05406 | -1.39000 |
| O  | 1.41316  | -3.17355 | -1.63590 |
| C  | 0.33651  | 0.18866  | -2.21614 |
| O  | -0.35972 | 0.51437  | -3.08462 |
| O  | 0.60902  | 2.43366  | -0.15870 |
| O  | -1.76204 | 2.56120  | -1.50873 |
| O  | -1.38486 | 2.43567  | 1.89109  |
| O  | -3.74959 | 1.99178  | 0.35045  |
| O  | -2.56074 | 5.19592  | -1.14319 |
| O  | -3.23283 | 4.44483  | 1.43490  |
| H  | -1.95379 | 0.02805  | -0.95164 |
| H  | -1.16769 | -1.54220 | -1.20350 |
| H  | 2.94935  | -0.02929 | 3.85025  |
| H  | -2.74074 | -1.01464 | 2.04270  |
| H  | 0.97540  | -0.21220 | 4.04214  |
| H  | -1.46158 | -0.56597 | 4.16420  |
| H  | 6.26205  | -1.03577 | 1.29317  |
| H  | 5.37835  | -0.37203 | 3.56853  |
| C  | -5.11568 | -4.52619 | -0.19483 |
| H  | -2.44257 | -3.67622 | -0.59828 |

|   |          |          |          |
|---|----------|----------|----------|
| H | 5.86229  | -1.74541 | -0.86155 |
| H | 4.22796  | -1.88836 | -1.55519 |
| H | 5.08503  | -0.32910 | -1.58335 |
| H | -4.32934 | 0.06529  | 0.04767  |
| H | -0.89544 | 2.45520  | -1.05620 |
| H | -3.15434 | 2.15514  | -0.40446 |
| H | -3.81155 | 2.87901  | 0.76861  |
| H | -2.23559 | 4.31108  | -1.40007 |
| H | -3.38700 | 5.29040  | -1.63315 |
| H | -0.61298 | 2.23423  | 1.33900  |
| H | -2.09652 | 1.90415  | 1.49444  |
| H | -2.42803 | 3.95470  | 1.69375  |
| H | -2.99090 | 4.84242  | 0.57305  |
| H | -1.63845 | 2.17261  | -2.38502 |
| H | 0.90891  | 3.34023  | 0.04528  |
| H | -5.82575 | -4.59691 | -1.02834 |
| H | -4.33006 | -5.28030 | -0.31210 |
| H | -5.64061 | -4.68465 | 0.75509  |

### 1<sub>C5</sub>(TS3)

|                  |   |                                 |
|------------------|---|---------------------------------|
| Energy           | = | -2899.556499                    |
| Enthalpy 0K      | = | -2899.069705                    |
| Enthalpy 298K    | = | -2899.028622                    |
| Free Energy 298K | = | -2899.144153                    |
| Nimag            | = | 1 (-212.7057 cm <sup>-1</sup> ) |

|    |          |          |          |
|----|----------|----------|----------|
| C  | -4.12617 | -1.29790 | 0.04459  |
| N  | -2.86918 | -1.75363 | -0.29267 |
| C  | -2.91589 | -3.07800 | -0.44154 |
| N  | -4.15836 | -3.48822 | -0.21216 |
| C  | -4.93525 | -2.39213 | 0.09464  |
| C  | -1.66559 | -0.94702 | -0.45511 |
| C  | -0.87326 | -0.76982 | 0.82374  |
| N  | 0.44457  | -0.50523 | 0.70388  |
| C  | 1.20061  | -0.38937 | 1.85995  |
| C  | 0.55965  | -0.39621 | 3.13514  |
| C  | -0.78389 | -0.62245 | 3.22584  |
| C  | -1.52225 | -0.85713 | 2.04319  |
| C  | 2.61427  | -0.35304 | 1.71486  |
| N  | 3.12156  | -0.47454 | 0.43123  |
| C  | 4.44998  | -0.67438 | 0.26572  |
| C  | 5.33739  | -0.65782 | 1.33502  |
| C  | 4.85156  | -0.40280 | 2.63620  |
| C  | 3.50368  | -0.26070 | 2.82656  |
| Mn | 1.62683  | -0.09103 | -1.00430 |
| C  | 1.82454  | 1.77034  | -0.35666 |
| O  | 2.40385  | 2.67267  | 0.03766  |
| C  | 5.00448  | -0.91752 | -1.10910 |
| H  | -5.99339 | -2.48797 | 0.32180  |
| C  | 2.68960  | 0.32610  | -2.40363 |
| O  | 3.24348  | 0.62806  | -3.36365 |
| C  | 1.60514  | -1.87784 | -1.44085 |
| O  | 1.61115  | -2.99416 | -1.68366 |
| C  | 0.31728  | 0.35310  | -2.17410 |
| O  | -0.40081 | 0.62670  | -3.02773 |
| O  | -0.17207 | 2.66262  | -0.59810 |
| O  | -2.40783 | 2.28913  | -1.51392 |

|   |          |          |          |
|---|----------|----------|----------|
| O | -1.30280 | 2.49847  | 1.78184  |
| O | -3.89828 | 1.64405  | 0.65646  |
| O | -3.41525 | 4.75977  | -1.09516 |
| O | -3.45955 | 4.17982  | 1.62395  |
| H | -1.97161 | 0.03374  | -0.84862 |
| H | -1.05602 | -1.44907 | -1.21238 |
| H | 3.10972  | -0.08847 | 3.82745  |
| H | -2.58880 | -1.06905 | 2.09340  |
| H | 1.14774  | -0.24213 | 4.03899  |
| H | -1.28177 | -0.63680 | 4.19775  |
| H | 6.39931  | -0.82709 | 1.15318  |
| H | 5.54010  | -0.33773 | 3.48204  |
| C | -4.63282 | -4.86221 | -0.28786 |
| H | -2.07548 | -3.71341 | -0.71207 |
| H | 6.00619  | -1.36093 | -1.03557 |
| H | 4.37095  | -1.59858 | -1.69344 |
| H | 5.10661  | 0.02429  | -1.66743 |
| H | -4.30958 | -0.23997 | 0.25190  |
| H | -1.39256 | 2.43345  | -1.15888 |
| H | -3.43122 | 1.83813  | -0.18495 |
| H | -3.96146 | 2.52658  | 1.07833  |
| H | -3.04015 | 3.88585  | -1.35610 |
| H | -4.34638 | 4.68797  | -1.33733 |
| H | -0.79728 | 2.57319  | 0.92308  |
| H | -1.96003 | 1.81638  | 1.57480  |
| H | -2.58659 | 3.74807  | 1.75788  |
| H | -3.41134 | 4.51304  | 0.70437  |
| H | -2.34782 | 1.91872  | -2.40076 |
| H | 0.04309  | 3.59195  | -0.74474 |
| H | -5.37926 | -4.94686 | -1.08758 |
| H | -3.78399 | -5.52013 | -0.50277 |
| H | -5.08345 | -5.14228 | 0.67213  |

### 1<sub>C5</sub>(I7-R)

|                  |   |                               |
|------------------|---|-------------------------------|
| Energy           | = | -2899.564716                  |
| Enthalpy 0K      | = | -2899.076304                  |
| Enthalpy 298K    | = | -2899.034492                  |
| Free Energy 298K | = | -2899.151784                  |
| Nimag            | = | 0 (17.4194 cm <sup>-1</sup> ) |

|   |          |          |          |
|---|----------|----------|----------|
| C | -3.76662 | -1.88807 | -0.17202 |
| N | -2.42294 | -2.02752 | -0.44638 |
| C | -2.14248 | -3.32443 | -0.57756 |
| N | -3.25841 | -4.02261 | -0.39784 |
| C | -4.28982 | -3.14563 | -0.14197 |
| C | -1.43885 | -0.95392 | -0.55641 |
| C | -0.67208 | -0.73330 | 0.73199  |
| N | 0.63321  | -0.39919 | 0.65591  |
| C | 1.36005  | -0.28853 | 1.83088  |
| C | 0.68903  | -0.34003 | 3.08930  |
| C | -0.64972 | -0.61299 | 3.13818  |
| C | -1.34477 | -0.86415 | 1.93427  |
| C | 2.77355  | -0.19922 | 1.70850  |
| N | 3.29468  | -0.18774 | 0.42321  |
| C | 4.63035  | -0.32302 | 0.24949  |
| C | 5.50792  | -0.38403 | 1.32455  |

|    |          |          |          |
|----|----------|----------|----------|
| C  | 5.00453  | -0.27604 | 2.64026  |
| C  | 3.65192  | -0.19103 | 2.83189  |
| Mn | 1.78749  | 0.29409  | -0.96256 |
| C  | 1.82501  | 2.00634  | -0.14182 |
| O  | 1.97613  | 3.03372  | 0.31652  |
| C  | 5.20086  | -0.39584 | -1.13799 |
| H  | -5.30387 | -3.49223 | 0.03662  |
| C  | 2.83361  | 0.92441  | -2.30599 |
| O  | 3.38013  | 1.35580  | -3.21638 |
| C  | 1.87258  | -1.45740 | -1.60258 |
| O  | 1.94308  | -2.53828 | -1.95298 |
| C  | 0.41870  | 0.80057  | -2.05292 |
| O  | -0.34298 | 1.15803  | -2.82926 |
| O  | -0.99520 | 2.48645  | 0.21903  |
| O  | -2.92584 | 1.82938  | -1.30012 |
| O  | -2.89364 | 2.00649  | 2.16474  |
| O  | -4.75241 | 0.96344  | 0.30917  |
| O  | -3.99379 | 4.20084  | -1.14881 |
| O  | -5.04013 | 3.54956  | 1.30019  |
| H  | -1.98033 | -0.03340 | -0.84344 |
| H  | -0.76447 | -1.23331 | -1.37047 |
| H  | 3.24515  | -0.13821 | 3.84107  |
| H  | -2.40279 | -1.12163 | 1.95000  |
| H  | 1.24621  | -0.17068 | 4.01011  |
| H  | -1.17535 | -0.64881 | 4.09465  |
| H  | 6.57625  | -0.49851 | 1.13796  |
| H  | 5.68496  | -0.27994 | 3.49503  |
| C  | -3.38014 | -5.47136 | -0.47031 |
| H  | -1.16195 | -3.73999 | -0.79928 |
| H  | 6.21388  | -0.81770 | -1.10465 |
| H  | 4.59303  | -1.02164 | -1.80520 |
| H  | 5.28247  | 0.60668  | -1.58293 |
| H  | -4.22822 | -0.91115 | -0.00109 |
| H  | -1.70942 | 2.21276  | -0.45691 |
| H  | -4.10107 | 1.25640  | -0.39985 |
| H  | -5.12545 | 1.80987  | 0.62339  |
| H  | -3.54991 | 3.30198  | -1.26119 |
| H  | -4.74482 | 4.15771  | -1.75168 |
| H  | -2.12688 | 2.19303  | 1.58008  |
| H  | -3.42473 | 1.39949  | 1.61441  |
| H  | -4.23811 | 3.20577  | 1.74315  |
| H  | -4.68626 | 3.89180  | 0.44881  |
| H  | -2.75682 | 1.57762  | -2.21341 |
| H  | -0.89389 | 3.43524  | 0.08360  |
| H  | -4.06382 | -5.73941 | -1.28534 |
| H  | -2.39096 | -5.90180 | -0.66081 |
| H  | -3.77077 | -5.85022 | 0.48207  |

### **1<sub>C5</sub><sup>+</sup>(I5-P)**

|                  |                                 |
|------------------|---------------------------------|
| Energy           | = -2899.482822                  |
| Enthalpy 0K      | = -2898.988467                  |
| Enthalpy 298K    | = -2898.947038                  |
| Free Energy 298K | = -2899.063536                  |
| Nimag            | = 0 (10.7610 cm <sup>-1</sup> ) |

|   |          |          |         |
|---|----------|----------|---------|
| C | -4.33672 | -0.68846 | 0.00288 |
|---|----------|----------|---------|

|    |          |          |          |
|----|----------|----------|----------|
| N  | -3.18624 | -1.41383 | -0.23137 |
| C  | -3.48937 | -2.71356 | -0.24309 |
| N  | -4.79169 | -2.84593 | -0.02397 |
| C  | -5.34494 | -1.59321 | 0.13378  |
| C  | -1.85131 | -0.87202 | -0.42915 |
| C  | -1.07616 | -0.67068 | 0.85473  |
| N  | 0.25681  | -0.50148 | 0.76405  |
| C  | 0.96059  | -0.33519 | 1.90218  |
| C  | 0.35124  | -0.29182 | 3.15611  |
| C  | -1.02104 | -0.44674 | 3.24394  |
| C  | -1.74177 | -0.65407 | 2.07800  |
| C  | 2.43698  | -0.30948 | 1.77447  |
| N  | 2.93450  | -0.72568 | 0.59036  |
| C  | 4.25822  | -0.93262 | 0.47484  |
| C  | 5.12962  | -0.61374 | 1.52474  |
| C  | 4.63248  | -0.07906 | 2.70011  |
| C  | 3.25573  | 0.05447  | 2.83859  |
| Mn | 1.50561  | -0.51200 | -0.98172 |
| C  | 1.90027  | 1.47979  | -0.72023 |
| O  | 2.98066  | 2.01640  | -0.64528 |
| C  | 4.83325  | -1.52234 | -0.77643 |
| H  | -6.40587 | -1.45720 | 0.32465  |
| C  | 2.64163  | -0.42997 | -2.37586 |
| O  | 3.26190  | -0.32016 | -3.33644 |
| C  | 1.27788  | -2.33407 | -1.13251 |
| O  | 1.14233  | -3.46527 | -1.24763 |
| C  | 0.31323  | -0.10248 | -2.24461 |
| O  | -0.35501 | 0.19235  | -3.13888 |
| O  | 0.80435  | 2.36623  | -0.62526 |
| O  | -1.66051 | 2.54265  | -1.80762 |
| O  | -0.90255 | 2.50579  | 1.69193  |
| O  | -3.36169 | 2.18835  | 0.35286  |
| O  | -2.11140 | 5.25326  | -1.32155 |
| O  | -2.68423 | 4.63836  | 1.30847  |
| H  | -1.95794 | 0.08751  | -0.95312 |
| H  | -1.31575 | -1.56327 | -1.08833 |
| H  | 2.83234  | 0.43727  | 3.76528  |
| H  | -2.82058 | -0.79704 | 2.12228  |
| H  | 0.94479  | -0.16663 | 4.05952  |
| H  | -1.52391 | -0.42234 | 4.21177  |
| H  | 6.19880  | -0.78694 | 1.39476  |
| H  | 5.30152  | 0.20657  | 3.51377  |
| C  | -5.52547 | -4.10261 | 0.02693  |
| H  | -2.78513 | -3.52541 | -0.41085 |
| H  | 5.76906  | -2.04670 | -0.54183 |
| H  | 4.14237  | -2.23388 | -1.24486 |
| H  | 5.07612  | -0.73369 | -1.50313 |
| H  | -4.30986 | 0.40033  | 0.08564  |
| H  | -0.75268 | 2.38906  | -1.46906 |
| H  | -2.89870 | 2.30257  | -0.49815 |
| H  | -3.37391 | 3.09976  | 0.72474  |
| H  | -1.93980 | 4.34519  | -1.63581 |
| H  | -2.93686 | 5.50026  | -1.75677 |
| H  | -0.24469 | 2.38516  | 0.98959  |
| H  | -1.70823 | 2.10318  | 1.31810  |
| H  | -1.89259 | 4.13192  | 1.57075  |
| H  | -2.45224 | 4.98397  | 0.42085  |

|   |          |          |          |
|---|----------|----------|----------|
| H | -1.68227 | 2.14770  | -2.68918 |
| H | 1.18239  | 3.26550  | -0.56249 |
| H | -6.26617 | -4.12346 | -0.78214 |
| H | -4.81998 | -4.93151 | -0.09463 |
| H | -6.03111 | -4.18593 | 0.99661  |

**1<sub>C5</sub><sup>+</sup>(TS4)**

|                  |   |                                 |
|------------------|---|---------------------------------|
| Energy           | = | -2899.45682004                  |
| Enthalpy 0K      | = | -2898.967595                    |
| Enthalpy 298K    | = | -2898.926658                    |
| Free Energy 298K | = | -2899.040988                    |
| Nimag            | = | 1 (-288.8837 cm <sup>-1</sup> ) |

|    |          |          |          |
|----|----------|----------|----------|
| C  | -4.21479 | -1.06759 | 0.15224  |
| N  | -2.98475 | -1.60604 | -0.16746 |
| C  | -3.10726 | -2.93141 | -0.26725 |
| N  | -4.36892 | -3.26068 | -0.02047 |
| C  | -5.08261 | -2.11185 | 0.24552  |
| C  | -1.74360 | -0.87713 | -0.38489 |
| C  | -0.94228 | -0.64648 | 0.87637  |
| N  | 0.38445  | -0.45130 | 0.76442  |
| C  | 1.10700  | -0.27219 | 1.89064  |
| C  | 0.51423  | -0.20727 | 3.14990  |
| C  | -0.85609 | -0.37339 | 3.25935  |
| C  | -1.58855 | -0.62247 | 2.11069  |
| C  | 2.58278  | -0.25304 | 1.74003  |
| N  | 3.06087  | -0.55955 | 0.51238  |
| C  | 4.38277  | -0.76828 | 0.35415  |
| C  | 5.27127  | -0.56604 | 1.41719  |
| C  | 4.79682  | -0.14731 | 2.64761  |
| C  | 3.42505  | -0.00924 | 2.82003  |
| Mn | 1.58932  | -0.27514 | -0.99680 |
| C  | 1.89364  | 1.62727  | -0.60140 |
| O  | 2.48376  | 2.55665  | -0.30824 |
| C  | 4.93646  | -1.22974 | -0.95878 |
| H  | -6.14344 | -2.13932 | 0.47846  |
| C  | 2.68352  | -0.09092 | -2.43386 |
| O  | 3.26169  | 0.06008  | -3.41067 |
| C  | 1.46466  | -2.10887 | -1.25800 |
| O  | 1.41087  | -3.23604 | -1.41459 |
| C  | 0.29835  | 0.11065  | -2.23164 |
| O  | -0.40527 | 0.31267  | -3.11029 |
| O  | -0.09251 | 2.58808  | -1.05434 |
| O  | -2.40764 | 2.21829  | -1.65215 |
| O  | -0.82105 | 2.57296  | 1.48752  |
| O  | -3.51818 | 1.80299  | 0.76496  |
| O  | -3.15790 | 4.77817  | -1.24323 |
| O  | -2.92643 | 4.38417  | 1.48587  |
| H  | -1.99487 | 0.09005  | -0.84882 |
| H  | -1.16034 | -1.46445 | -1.09902 |
| H  | 3.02476  | 0.27994  | 3.78939  |
| H  | -2.66352 | -0.78151 | 2.17281  |
| H  | 1.11546  | -0.05295 | 4.04327  |
| H  | -1.34567 | -0.32916 | 4.23325  |
| H  | 6.33607  | -0.73726 | 1.25493  |
| H  | 5.48044  | 0.04479  | 3.47628  |
| C  | -4.91894 | -4.60880 | -0.04755 |

|   |          |          |          |
|---|----------|----------|----------|
| H | -2.30583 | -3.62277 | -0.51795 |
| H | 5.89635  | -1.73618 | -0.79517 |
| H | 4.26083  | -1.92938 | -1.46630 |
| H | 5.13124  | -0.37559 | -1.62350 |
| H | -4.33402 | 0.00426  | 0.32408  |
| H | -1.32459 | 2.36551  | -1.44145 |
| H | -3.21386 | 1.92979  | -0.16218 |
| H | -3.54650 | 2.71922  | 1.11447  |
| H | -2.89863 | 3.86203  | -1.50232 |
| H | -4.11060 | 4.79824  | -1.39410 |
| H | -0.47854 | 2.62639  | 0.55246  |
| H | -1.60939 | 2.01551  | 1.38035  |
| H | -2.05168 | 3.95074  | 1.56715  |
| H | -2.96404 | 4.65067  | 0.54295  |
| H | -2.49769 | 1.82197  | -2.52503 |
| H | 0.15019  | 3.47814  | -1.33645 |
| H | -5.65134 | -4.68707 | -0.86072 |
| H | -4.10326 | -5.32097 | -0.21239 |
| H | -5.40533 | -4.81884 | 0.91275  |

**1<sub>C5</sub><sup>+</sup>(I6-P)**

|                  |   |                               |
|------------------|---|-------------------------------|
| Energy           | = | -2899.463952                  |
| Enthalpy 0K      | = | -2898.971653                  |
| Enthalpy 298K    | = | -2898.930321                  |
| Free Energy 298K | = | -2899.044768                  |
| Nimag            | = | 0 (19.5372 cm <sup>-1</sup> ) |

|    |          |          |          |
|----|----------|----------|----------|
| C  | -4.21409 | -0.96835 | 0.19880  |
| N  | -3.01586 | -1.50201 | -0.23109 |
| C  | -3.19519 | -2.79585 | -0.50428 |
| N  | -4.46237 | -3.11006 | -0.26378 |
| C  | -5.12086 | -1.98319 | 0.17919  |
| C  | -1.75536 | -0.79001 | -0.39862 |
| C  | -0.91939 | -0.73718 | 0.85864  |
| N  | 0.41151  | -0.56376 | 0.74716  |
| C  | 1.15758  | -0.54053 | 1.87303  |
| C  | 0.58624  | -0.61292 | 3.14125  |
| C  | -0.78637 | -0.75733 | 3.25636  |
| C  | -1.54278 | -0.84540 | 2.10110  |
| C  | 2.63147  | -0.52393 | 1.70280  |
| N  | 3.09433  | -0.62051 | 0.43505  |
| C  | 4.41684  | -0.78874 | 0.22736  |
| C  | 5.31654  | -0.77825 | 1.29922  |
| C  | 4.85665  | -0.59148 | 2.59048  |
| C  | 3.48850  | -0.48033 | 2.79862  |
| Mn | 1.58624  | -0.16678 | -0.99253 |
| C  | 1.88407  | 1.62956  | -0.42288 |
| O  | 2.24980  | 2.64557  | -0.08163 |
| C  | 4.96234  | -0.99281 | -1.15169 |
| H  | -6.17448 | -2.00365 | 0.44334  |
| C  | 2.63700  | 0.16570  | -2.44590 |
| O  | 3.16875  | 0.41120  | -3.42765 |
| C  | 1.46335  | -1.99028 | -1.41867 |
| O  | 1.40152  | -3.09959 | -1.65543 |
| C  | 0.26073  | 0.29509  | -2.17685 |
| O  | -0.44734 | 0.53896  | -3.03772 |

|   |          |          |          |
|---|----------|----------|----------|
| O | -0.43634 | 3.00396  | -1.30833 |
| O | -2.82076 | 2.05534  | -1.26415 |
| O | -0.61896 | 2.39128  | 1.37816  |
| O | -3.35163 | 1.74403  | 1.23184  |
| O | -2.72702 | 4.62383  | -0.88289 |
| O | -2.60025 | 4.35668  | 1.83774  |
| H | -2.00095 | 0.23634  | -0.74527 |
| H | -1.21296 | -1.31474 | -1.18932 |
| H | 3.10365  | -0.36774 | 3.80956  |
| H | -2.62022 | -0.98192 | 2.16485  |
| H | 1.20219  | -0.57915 | 4.03658  |
| H | -1.25827 | -0.81859 | 4.23807  |
| H | 6.37941  | -0.91351 | 1.09623  |
| H | 5.54911  | -0.55532 | 3.43319  |
| C | -5.06662 | -4.42214 | -0.44661 |
| H | -2.43067 | -3.47558 | -0.87424 |
| H | 5.96548  | -1.43283 | -1.08997 |
| H | 4.33139  | -1.66394 | -1.74788 |
| H | 5.06234  | -0.03209 | -1.67714 |
| H | -4.28775 | 0.06942  | 0.52740  |
| H | -1.31455 | 2.52804  | -1.43932 |
| H | -3.23639 | 1.86444  | 0.23672  |
| H | -3.35892 | 2.66127  | 1.56721  |
| H | -2.90822 | 3.65527  | -1.10010 |
| H | -3.39398 | 5.13555  | -1.35297 |
| H | -0.49720 | 2.61978  | 0.42971  |
| H | -1.47942 | 1.92744  | 1.37685  |
| H | -1.75317 | 3.87300  | 1.83927  |
| H | -2.69550 | 4.59312  | 0.88971  |
| H | -3.34204 | 1.71826  | -1.99983 |
| H | -0.73945 | 3.92286  | -1.28279 |
| H | -5.85760 | -4.35572 | -1.20399 |
| H | -4.29535 | -5.12573 | -0.77767 |
| H | -5.49174 | -4.76018 | 0.50626  |

### 2c2(I6-R)

|                  |                                 |
|------------------|---------------------------------|
| Energy           | = -2938.862601                  |
| Enthalpy 0K      | = -2938.343468                  |
| Enthalpy 298K    | = -2938.300369                  |
| Free Energy 298K | = -2938.419603                  |
| Nimag            | = 0 (22.8449 cm <sup>-1</sup> ) |

|   |          |          |          |
|---|----------|----------|----------|
| C | -4.07375 | -1.62544 | -0.33707 |
| N | -2.79137 | -1.93533 | -0.09497 |
| C | -2.72353 | -3.18770 | 0.47935  |
| C | -3.99831 | -3.63703 | 0.59424  |
| N | -4.82068 | -2.65418 | 0.08360  |
| C | -1.62570 | -1.11795 | -0.40099 |
| C | -0.85960 | -0.69644 | 0.83743  |
| N | 0.46505  | -0.49108 | 0.70902  |
| C | 1.20053  | -0.20183 | 1.84943  |
| C | 0.52974  | 0.03039  | 3.08822  |
| C | -0.82544 | -0.12069 | 3.17528  |
| C | -1.54702 | -0.52947 | 2.02885  |
| C | 2.61644  | -0.24422 | 1.73247  |
| N | 3.13473  | -0.61057 | 0.50282  |

|    |          |          |          |
|----|----------|----------|----------|
| C  | 4.45109  | -0.88209 | 0.40042  |
| C  | 5.33020  | -0.71025 | 1.46781  |
| C  | 4.83781  | -0.21536 | 2.69313  |
| C  | 3.49262  | 0.00728  | 2.83009  |
| Mn | 1.68383  | -0.39970 | -1.02099 |
| C  | 1.92083  | 1.60563  | -0.66326 |
| O  | 2.94059  | 2.25718  | -0.67284 |
| C  | 5.01021  | -1.38257 | -0.90203 |
| C  | -6.27356 | -2.73239 | 0.01712  |
| C  | 2.79003  | -0.16903 | -2.41638 |
| O  | 3.39173  | 0.03077  | -3.37773 |
| C  | 1.58781  | -2.21693 | -1.22660 |
| O  | 1.53055  | -3.35476 | -1.36656 |
| C  | 0.42973  | -0.03824 | -2.22620 |
| O  | -0.30585 | 0.23608  | -3.07955 |
| O  | 0.75942  | 2.36916  | -0.38937 |
| O  | -1.73566 | 2.26790  | -1.47260 |
| O  | -0.98487 | 2.82726  | 1.87454  |
| O  | -3.47020 | 2.18790  | 0.73119  |
| O  | -2.40615 | 4.96514  | -1.54968 |
| O  | -2.80168 | 4.80909  | 1.18241  |
| H  | -1.96622 | -0.23113 | -0.94925 |
| H  | -0.98303 | -1.70595 | -1.06418 |
| H  | 3.09252  | 0.36640  | 3.77784  |
| H  | -2.62322 | -0.69156 | 2.07311  |
| H  | 1.10219  | 0.31600  | 3.97024  |
| H  | -1.34554 | 0.06018  | 4.11841  |
| H  | 6.38737  | -0.94512 | 1.33738  |
| H  | 5.51709  | -0.02893 | 3.52869  |
| H  | -4.39597 | -4.56708 | 0.98986  |
| H  | -1.77514 | -3.64143 | 0.75314  |
| H  | -6.58236 | -3.69029 | 0.44839  |
| H  | -6.60704 | -2.68084 | -1.02709 |
| H  | -6.72181 | -1.91377 | 0.59394  |
| H  | 5.97382  | -1.88118 | -0.73131 |
| H  | 4.33267  | -2.09521 | -1.39100 |
| H  | 5.19143  | -0.55152 | -1.59891 |
| C  | -4.57299 | -0.37371 | -0.94924 |
| H  | -0.82170 | 2.23045  | -1.10979 |
| H  | -2.96028 | 2.14175  | -0.09800 |
| H  | -3.49142 | 3.15273  | 0.91221  |
| H  | -2.14723 | 4.02708  | -1.64002 |
| H  | -3.28259 | 5.00306  | -1.95236 |
| H  | -0.29744 | 2.46537  | 1.29503  |
| H  | -1.76561 | 2.27999  | 1.67029  |
| H  | -1.99244 | 4.33471  | 1.45555  |
| H  | -2.64362 | 5.00532  | 0.23614  |
| H  | -1.69514 | 1.78942  | -2.31123 |
| H  | 1.05968  | 3.29505  | -0.31170 |
| H  | -5.64464 | -0.45383 | -1.16273 |
| H  | -4.40649 | 0.47757  | -0.27015 |
| H  | -4.04351 | -0.17389 | -1.89177 |

### 2c2(TS3)

|               |                |
|---------------|----------------|
| Energy        | = -2938.841499 |
| Enthalpy 0K   | = -2938.327444 |
| Enthalpy 298K | = -2938.284610 |

Free Energy 298K = -2938.403659  
Nimag = 1 (-209.3725 cm<sup>-1</sup>)

|    |          |          |          |
|----|----------|----------|----------|
| C  | -3.93002 | -1.80225 | -0.31071 |
| N  | -2.61723 | -1.99274 | -0.11133 |
| C  | -2.41184 | -3.25307 | 0.41107  |
| C  | -3.63258 | -3.82980 | 0.53939  |
| N  | -4.56093 | -2.91474 | 0.08849  |
| C  | -1.53857 | -1.05943 | -0.41158 |
| C  | -0.75394 | -0.66813 | 0.82436  |
| N  | 0.56987  | -0.45049 | 0.69534  |
| C  | 1.31092  | -0.19418 | 1.83786  |
| C  | 0.64945  | -0.00310 | 3.08741  |
| C  | -0.70486 | -0.16315 | 3.17778  |
| C  | -1.42965 | -0.54440 | 2.02620  |
| C  | 2.72638  | -0.21884 | 1.70752  |
| N  | 3.23833  | -0.49878 | 0.44978  |
| C  | 4.56115  | -0.75082 | 0.31871  |
| C  | 5.44196  | -0.64238 | 1.38818  |
| C  | 4.95477  | -0.23486 | 2.65004  |
| C  | 3.61046  | -0.03318 | 2.81129  |
| Mn | 1.76460  | -0.22126 | -1.02997 |
| C  | 2.01076  | 1.68932  | -0.56215 |
| O  | 2.62218  | 2.61501  | -0.28809 |
| C  | 5.11541  | -1.15131 | -1.01901 |
| C  | -6.00073 | -3.13307 | 0.05778  |
| C  | 2.84019  | 0.03990  | -2.45729 |
| O  | 3.41020  | 0.23781  | -3.43489 |
| C  | 1.70240  | -2.03863 | -1.30447 |
| O  | 1.68443  | -3.17264 | -1.44365 |
| C  | 0.44812  | 0.16196  | -2.21510 |
| O  | -0.29306 | 0.39526  | -3.06054 |
| O  | 0.01501  | 2.58231  | -0.77504 |
| O  | -2.27795 | 2.07152  | -1.45124 |
| O  | -0.91200 | 2.87181  | 1.68514  |
| O  | -3.56772 | 1.85448  | 0.97877  |
| O  | -3.29539 | 4.57316  | -1.35088 |
| O  | -3.07370 | 4.53726  | 1.41507  |
| H  | -1.96855 | -0.15974 | -0.87326 |
| H  | -0.88888 | -1.55325 | -1.14063 |
| H  | 3.21441  | 0.25448  | 3.78458  |
| H  | -2.50635 | -0.70086 | 2.06716  |
| H  | 1.22692  | 0.26106  | 3.97263  |
| H  | -1.22009 | -0.01248 | 4.12890  |
| H  | 6.50004  | -0.85851 | 1.23577  |
| H  | 5.63947  | -0.10068 | 3.49087  |
| H  | -3.92619 | -4.80843 | 0.90806  |
| H  | -1.41632 | -3.62119 | 0.64300  |
| H  | -6.20435 | -4.12286 | 0.47982  |
| H  | -6.36623 | -3.09756 | -0.97644 |
| H  | -6.50966 | -2.37049 | 0.66048  |
| H  | 6.09918  | -1.62202 | -0.89183 |
| H  | 4.45967  | -1.86169 | -1.54035 |
| H  | 5.25636  | -0.27379 | -1.66681 |
| C  | -4.57071 | -0.58374 | -0.85463 |
| H  | -1.24041 | 2.27013  | -1.19910 |
| H  | -3.15414 | 1.86825  | 0.09216  |

|   |          |          |          |
|---|----------|----------|----------|
| H | -3.61793 | 2.80615  | 1.20543  |
| H | -2.92401 | 3.66730  | -1.47455 |
| H | -4.24385 | 4.44731  | -1.47504 |
| H | -0.48444 | 2.77816  | 0.78752  |
| H | -1.58190 | 2.17016  | 1.66966  |
| H | -2.19615 | 4.11373  | 1.54562  |
| H | -3.11276 | 4.68857  | 0.44861  |
| H | -2.27914 | 1.65429  | -2.31923 |
| H | 0.22442  | 3.46723  | -1.09830 |
| H | -5.62761 | -0.77316 | -1.07269 |
| H | -4.49398 | 0.24170  | -0.12868 |
| H | -4.07305 | -0.27196 | -1.78329 |

### 2c2(I7-R)

Energy = -2938.849793  
Enthalpy 0K = -2938.333746  
Enthalpy 298K = -2938.290233  
Free Energy 298K = -2938.410343  
Nimag = 0 (22.1177 cm<sup>-1</sup>)

|    |          |          |          |
|----|----------|----------|----------|
| C  | -3.44880 | -2.36192 | -0.33086 |
| N  | -2.14344 | -2.15955 | -0.10122 |
| C  | -1.59773 | -3.29290 | 0.46538  |
| C  | -2.60317 | -4.19491 | 0.58977  |
| N  | -3.74313 | -3.59938 | 0.09145  |
| C  | -1.37136 | -0.96466 | -0.43590 |
| C  | -0.60301 | -0.45963 | 0.76628  |
| N  | 0.72369  | -0.24763 | 0.66300  |
| C  | 1.43993  | 0.05239  | 1.80998  |
| C  | 0.74757  | 0.31386  | 3.03013  |
| C  | -0.61357 | 0.18353  | 3.08570  |
| C  | -1.30968 | -0.25772 | 1.93885  |
| C  | 2.85679  | 0.01459  | 1.70174  |
| N  | 3.38099  | -0.25344 | 0.44499  |
| C  | 4.70293  | -0.51312 | 0.32106  |
| C  | 5.57105  | -0.43306 | 1.40281  |
| C  | 5.07285  | -0.04473 | 2.66723  |
| C  | 3.72930  | 0.17092  | 2.81822  |
| Mn | 1.91921  | 0.08811  | -1.02974 |
| C  | 2.07307  | 1.90804  | -0.50665 |
| O  | 2.28515  | 2.98856  | -0.23095 |
| C  | 5.26539  | -0.88541 | -1.02099 |
| C  | -5.05871 | -4.22210 | 0.04259  |
| C  | 3.00706  | 0.41148  | -2.44664 |
| O  | 3.59015  | 0.64311  | -3.40596 |
| C  | 1.87398  | -1.74378 | -1.38290 |
| O  | 1.86295  | -2.86799 | -1.56267 |
| C  | 0.56595  | 0.51596  | -2.17701 |
| O  | -0.20154 | 0.80481  | -2.97518 |
| O  | -0.71803 | 2.65685  | -0.39347 |
| O  | -2.88705 | 1.70151  | -1.32016 |
| O  | -2.16664 | 2.93545  | 1.93106  |
| O  | -4.17078 | 1.23029  | 0.91948  |
| O  | -4.23198 | 3.90960  | -1.56251 |
| O  | -4.62671 | 3.97297  | 1.14484  |
| H  | -2.05447 | -0.17267 | -0.78511 |

|   |          |          |          |
|---|----------|----------|----------|
| H | -0.70103 | -1.24222 | -1.25379 |
| H | 3.32238  | 0.43887  | 3.79295  |
| H | -2.39214 | -0.38852 | 1.94382  |
| H | 1.30493  | 0.62150  | 3.91456  |
| H | -1.15425 | 0.40498  | 4.00814  |
| H | 6.62885  | -0.65590 | 1.25862  |
| H | 5.74932  | 0.06228  | 3.51848  |
| H | -2.61166 | -5.20639 | 0.98546  |
| H | -0.54539 | -3.35222 | 0.72868  |
| H | -4.97473 | -5.23106 | 0.45947  |
| H | -5.40664 | -4.28830 | -0.99614 |
| H | -5.77365 | -3.64172 | 0.63934  |
| H | 6.24322  | -1.36914 | -0.89768 |
| H | 4.60860  | -1.57567 | -1.56755 |
| H | 5.42147  | 0.00754  | -1.64397 |
| C | -4.39967 | -1.39528 | -0.92380 |
| H | -1.54696 | 2.24478  | -0.82899 |
| H | -3.71383 | 1.33289  | 0.03519  |
| H | -4.60367 | 2.10017  | 1.02763  |
| H | -3.68166 | 3.06246  | -1.51805 |
| H | -5.07929 | 3.60434  | -1.90647 |
| H | -1.54892 | 2.91020  | 1.16702  |
| H | -2.70812 | 2.14008  | 1.76667  |
| H | -3.71048 | 3.83503  | 1.46016  |
| H | -4.51137 | 4.06067  | 0.17200  |
| H | -2.85525 | 1.24867  | -2.16876 |
| H | -0.57938 | 3.47976  | -0.87505 |
| H | -5.34513 | -1.89248 | -1.16755 |
| H | -4.59164 | -0.57062 | -0.21763 |
| H | -3.98123 | -0.96082 | -1.84140 |

### **2<sub>C2</sub><sup>+</sup>(I5-P)**

|                  |                                 |
|------------------|---------------------------------|
| Energy           | = -2938.768350                  |
| Enthalpy 0K      | = -2938.246170                  |
| Enthalpy 298K    | = -2938.203240                  |
| Free Energy 298K | = -2938.322204                  |
| Nimag            | = 0 (18.6061 cm <sup>-1</sup> ) |

|   |          |          |          |
|---|----------|----------|----------|
| C | -4.17591 | -1.43181 | -0.24902 |
| N | -2.90749 | -1.80695 | -0.01701 |
| C | -2.89819 | -3.05652 | 0.57056  |
| C | -4.19366 | -3.43477 | 0.70447  |
| N | -4.96891 | -2.41553 | 0.19069  |
| C | -1.70715 | -1.06032 | -0.35572 |
| C | -0.93271 | -0.61293 | 0.86553  |
| N | 0.39898  | -0.45414 | 0.76083  |
| C | 1.09881  | -0.13957 | 1.87108  |
| C | 0.47911  | 0.08830  | 3.09862  |
| C | -0.89910 | -0.01673 | 3.18965  |
| C | -1.61224 | -0.38965 | 2.06147  |
| C | 2.57591  | -0.15051 | 1.74451  |
| N | 3.06736  | -0.66133 | 0.59480  |
| C | 4.38829  | -0.89267 | 0.49368  |
| C | 5.26480  | -0.51237 | 1.51844  |
| C | 4.77554  | 0.10940  | 2.65373  |
| C | 3.40124  | 0.27462  | 2.78049  |

|    |          |          |          |
|----|----------|----------|----------|
| Mn | 1.63421  | -0.58320 | -0.97980 |
| C  | 1.99605  | 1.42993  | -0.86856 |
| O  | 3.06795  | 1.98844  | -0.85559 |
| C  | 4.95434  | -1.57389 | -0.71471 |
| C  | -6.42515 | -2.42023 | 0.13690  |
| C  | 2.75642  | -0.57313 | -2.38822 |
| O  | 3.37031  | -0.51668 | -3.35741 |
| C  | 1.45353  | -2.41608 | -1.00784 |
| O  | 1.35883  | -3.55672 | -1.04940 |
| C  | 0.40822  | -0.26967 | -2.23906 |
| O  | -0.29794 | -0.02978 | -3.12030 |
| O  | 0.88608  | 2.30199  | -0.82270 |
| O  | -1.69395 | 2.26793  | -1.71614 |
| O  | -0.55970 | 2.82838  | 1.64074  |
| O  | -3.13581 | 2.31036  | 0.69048  |
| O  | -2.12733 | 5.02677  | -1.63957 |
| O  | -2.37409 | 4.89960  | 1.10680  |
| H  | -1.99615 | -0.18581 | -0.95306 |
| H  | -1.08750 | -1.71221 | -0.97889 |
| H  | 2.98406  | 0.72710  | 3.67803  |
| H  | -2.69430 | -0.50796 | 2.10346  |
| H  | 1.06572  | 0.33310  | 3.98190  |
| H  | -1.41014 | 0.17156  | 4.13499  |
| H  | 6.33145  | -0.70867 | 1.40125  |
| H  | 5.44876  | 0.44007  | 3.44662  |
| H  | -4.63633 | -4.33806 | 1.11423  |
| H  | -1.97143 | -3.55786 | 0.83622  |
| H  | -6.77762 | -3.36584 | 0.56114  |
| H  | -6.76318 | -2.34151 | -0.90392 |
| H  | -6.82590 | -1.58551 | 0.72553  |
| H  | 5.89561  | -2.07392 | -0.45086 |
| H  | 4.26396  | -2.32329 | -1.12098 |
| H  | 5.18455  | -0.84250 | -1.50273 |
| C  | -4.61087 | -0.16207 | -0.87207 |
| H  | -0.74695 | 2.17952  | -1.47475 |
| H  | -2.75337 | 2.25399  | -0.20415 |
| H  | -3.12710 | 3.27653  | 0.87145  |
| H  | -1.98097 | 4.07416  | -1.79536 |
| H  | -3.00477 | 5.19229  | -2.00629 |
| H  | 0.00463  | 2.56381  | 0.89858  |
| H  | -1.40395 | 2.37320  | 1.45729  |
| H  | -1.56111 | 4.41868  | 1.35169  |
| H  | -2.25367 | 5.08058  | 0.15129  |
| H  | -1.79786 | 1.79886  | -2.55434 |
| H  | 1.24579  | 3.21022  | -0.85659 |
| H  | -5.69634 | -0.15869 | -1.01816 |
| H  | -4.33306 | 0.69012  | -0.23191 |
| H  | -4.12605 | -0.03460 | -1.85111 |

### **2<sub>C2</sub><sup>+</sup>(TS4)**

|                  |                                   |
|------------------|-----------------------------------|
| Energy           | = -2938.742611                    |
| Enthalpy 0K      | = -2938.226020                    |
| Enthalpy 298K    | = -2938.184314                    |
| Free Energy 298K | = -2938.299083                    |
| Nimag            | = 1 (-265.6261 cm <sup>-1</sup> ) |

|   |          |          |          |
|---|----------|----------|----------|
| C | -4.02642 | -1.64578 | -0.20522 |
|---|----------|----------|----------|

|    |          |          |          |
|----|----------|----------|----------|
| N  | -2.71064 | -1.89610 | -0.10482 |
| C  | -2.52271 | -3.18796 | 0.34541  |
| C  | -3.75532 | -3.72287 | 0.52690  |
| N  | -4.67277 | -2.75259 | 0.18037  |
| C  | -1.61752 | -0.98979 | -0.42501 |
| C  | -0.83487 | -0.58845 | 0.80663  |
| N  | 0.49537  | -0.41537 | 0.72050  |
| C  | 1.18605  | -0.15046 | 1.85022  |
| C  | 0.55332  | 0.03873  | 3.07639  |
| C  | -0.82515 | -0.07878 | 3.15161  |
| C  | -1.52378 | -0.42237 | 2.00693  |
| C  | 2.66561  | -0.17669 | 1.74223  |
| N  | 3.17096  | -0.54800 | 0.54327  |
| C  | 4.49342  | -0.78312 | 0.43026  |
| C  | 5.35571  | -0.55749 | 1.50972  |
| C  | 4.85511  | -0.08616 | 2.71053  |
| C  | 3.48288  | 0.08915  | 2.83666  |
| Mn | 1.73771  | -0.34698 | -1.01411 |
| C  | 2.05918  | 1.57043  | -0.73737 |
| O  | 2.65844  | 2.51824  | -0.53543 |
| C  | 5.07423  | -1.29652 | -0.85091 |
| C  | -6.12004 | -2.91690 | 0.23037  |
| C  | 2.84722  | -0.26998 | -2.44908 |
| O  | 3.43409  | -0.19956 | -3.43010 |
| C  | 1.60556  | -2.19366 | -1.16265 |
| O  | 1.55604  | -3.32945 | -1.23852 |
| C  | 0.45618  | 0.00417  | -2.27143 |
| O  | -0.24771 | 0.19521  | -3.15199 |
| O  | 0.03432  | 2.48670  | -1.11305 |
| O  | -2.30991 | 2.06572  | -1.55970 |
| O  | -0.51168 | 2.78296  | 1.45541  |
| O  | -3.26510 | 2.04076  | 1.00942  |
| O  | -2.97043 | 4.68498  | -1.37923 |
| O  | -2.53346 | 4.67602  | 1.35120  |
| H  | -2.02111 | -0.08704 | -0.90883 |
| H  | -0.97611 | -1.51395 | -1.13887 |
| H  | 3.06312  | 0.42165  | 3.78360  |
| H  | -2.60515 | -0.54696 | 2.03219  |
| H  | 1.12737  | 0.26342  | 3.97261  |
| H  | -1.34546 | 0.07720  | 4.09774  |
| H  | 6.42117  | -0.75331 | 1.38408  |
| H  | 5.51857  | 0.12047  | 3.55200  |
| H  | -4.06454 | -4.70735 | 0.86617  |
| H  | -1.52967 | -3.60408 | 0.49164  |
| H  | -6.33550 | -3.93284 | 0.57703  |
| H  | -6.54894 | -2.77665 | -0.76981 |
| H  | -6.55650 | -2.19337 | 0.93022  |
| H  | 6.04605  | -1.76686 | -0.65438 |
| H  | 4.42319  | -2.04094 | -1.32623 |
| H  | 5.25016  | -0.47293 | -1.55790 |
| C  | -4.64757 | -0.37487 | -0.63925 |
| H  | -1.22203 | 2.22674  | -1.41302 |
| H  | -3.01307 | 2.00987  | 0.06317  |
| H  | -3.24133 | 2.99930  | 1.21328  |
| H  | -2.75094 | 3.73525  | -1.53186 |
| H  | -3.93237 | 4.71158  | -1.44855 |
| H  | -0.23710 | 2.71007  | 0.49928  |

|   |          |          |          |
|---|----------|----------|----------|
| H | -1.31734 | 2.23983  | 1.47555  |
| H | -1.67872 | 4.20330  | 1.43343  |
| H | -2.62923 | 4.81093  | 0.38519  |
| H | -2.43949 | 1.68180  | -2.43330 |
| H | 0.25591  | 3.34078  | -1.50328 |
| H | -5.73058 | -0.49652 | -0.74987 |
| H | -4.44663 | 0.41811  | 0.09835  |
| H | -4.23034 | -0.05510 | -1.60403 |

### 2<sub>C2</sub><sup>+</sup>(16-P)

|                  |   |                               |
|------------------|---|-------------------------------|
| Energy           | = | -2938.749364                  |
| Enthalpy 0K      | = | -2938.228614                  |
| Enthalpy 298K    | = | -2938.185890                  |
| Free Energy 298K | = | -2938.302947                  |
| Nimag            | = | 0 (15.8031 cm <sup>-1</sup> ) |

|    |          |          |          |
|----|----------|----------|----------|
| C  | -4.05040 | -1.59776 | -0.26394 |
| N  | -2.72596 | -1.80716 | -0.33908 |
| C  | -2.47038 | -3.16035 | -0.23791 |
| C  | -3.66890 | -3.77785 | -0.09710 |
| N  | -4.63486 | -2.79343 | -0.11595 |
| C  | -1.67563 | -0.81047 | -0.50933 |
| C  | -0.85921 | -0.65075 | 0.75420  |
| N  | 0.47768  | -0.52353 | 0.68812  |
| C  | 1.18083  | -0.48216 | 1.84142  |
| C  | 0.55702  | -0.45565 | 3.08582  |
| C  | -0.82608 | -0.52283 | 3.15152  |
| C  | -1.53745 | -0.65364 | 1.97286  |
| C  | 2.65749  | -0.56215 | 1.72183  |
| N  | 3.15819  | -0.67590 | 0.46952  |
| C  | 4.47637  | -0.91366 | 0.30562  |
| C  | 5.33565  | -0.97279 | 1.40844  |
| C  | 4.84000  | -0.78602 | 2.68658  |
| C  | 3.47473  | -0.59354 | 2.84790  |
| Mn | 1.71954  | -0.16122 | -1.00643 |
| C  | 2.08961  | 1.61766  | -0.42229 |
| O  | 2.50034  | 2.61304  | -0.07122 |
| C  | 5.05932  | -1.11861 | -1.05777 |
| C  | -6.06722 | -3.03123 | 0.00563  |
| C  | 2.81497  | 0.11936  | -2.43733 |
| O  | 3.37886  | 0.32351  | -3.41065 |
| C  | 1.53307  | -1.97334 | -1.45170 |
| O  | 1.44006  | -3.07727 | -1.70383 |
| C  | 0.43281  | 0.38274  | -2.20098 |
| O  | -0.26107 | 0.68215  | -3.05546 |
| O  | -0.19897 | 3.05103  | -1.22384 |
| O  | -2.61321 | 2.18605  | -1.22698 |
| O  | -0.37269 | 2.50184  | 1.45999  |
| O  | -3.11965 | 1.93888  | 1.31523  |
| O  | -2.43710 | 4.75197  | -0.86675 |
| O  | -2.28183 | 4.54734  | 1.85457  |
| H  | -2.11465 | 0.16537  | -0.79989 |
| H  | -1.05305 | -1.17098 | -1.33103 |
| H  | 3.05871  | -0.48180 | 3.84620  |
| H  | -2.62288 | -0.73632 | 1.98526  |
| H  | 1.13815  | -0.39654 | 4.00330  |



|   |          |          |          |
|---|----------|----------|----------|
| H | -1.33856 | -0.49416 | 4.11416  |
| H | 6.39605  | -1.16409 | 1.24079  |
| H | 5.50176  | -0.81012 | 3.55401  |
| H | -3.92413 | -4.82831 | 0.00929  |
| H | -1.45894 | -3.55452 | -0.27991 |
| H | -6.22480 | -4.10896 | 0.11961  |
| H | -6.58499 | -2.68207 | -0.89659 |
| H | -6.46140 | -2.51201 | 0.88818  |
| H | 6.05044  | -1.58065 | -0.97036 |
| H | 4.43245  | -1.77152 | -1.67846 |
| H | 5.19454  | -0.15558 | -1.57118 |
| C | -4.73575 | -0.28835 | -0.31133 |
| H | -1.09644 | 2.60120  | -1.34458 |
| H | -3.02961 | 2.00435  | 0.32011  |
| H | -3.09562 | 2.87098  | 1.60496  |
| H | -2.64544 | 3.78266  | -1.06288 |
| H | -3.10516 | 5.26988  | -1.32833 |
| H | -0.24596 | 2.71151  | 0.50735  |
| H | -1.24618 | 2.06201  | 1.46415  |
| H | -1.45675 | 4.02651  | 1.86869  |
| H | -2.37311 | 4.75936  | 0.90022  |
| H | -3.07382 | 1.91576  | -2.02759 |
| H | -0.46678 | 3.98084  | -1.23741 |
| H | -5.82127 | -0.42072 | -0.25123 |
| H | -4.39871 | 0.35191  | 0.51896  |
| H | -4.49089 | 0.23684  | -1.24457 |

### 2<sub>C5</sub>(I5-R)

|                  |   |                               |
|------------------|---|-------------------------------|
| Energy           | = | -2557.048705                  |
| Enthalpy 0K      | = | -2556.659467                  |
| Enthalpy 298K    | = | -2556.628753                  |
| Free Energy 298K | = | -2556.721329                  |
| Nimag            | = | 0 (21.9072 cm <sup>-1</sup> ) |

|    |          |          |          |
|----|----------|----------|----------|
| C  | -4.38496 | 0.01572  | 0.51340  |
| N  | -3.09220 | 0.27588  | 0.27049  |
| C  | -2.85982 | 0.23387  | -1.08912 |
| C  | -4.05124 | -0.05542 | -1.67378 |
| N  | -4.98379 | -0.18686 | -0.66587 |
| C  | -2.08705 | 0.54771  | 1.30147  |
| C  | -1.03140 | 1.50531  | 0.80186  |
| N  | 0.18617  | 1.04360  | 0.47317  |
| C  | 1.15263  | 1.96411  | 0.08960  |
| C  | 0.79275  | 3.33359  | -0.10856 |
| C  | -0.47136 | 3.76724  | 0.18419  |
| C  | -1.40745 | 2.83887  | 0.69648  |
| C  | 2.48502  | 1.48865  | -0.04370 |
| N  | 2.70491  | 0.15065  | 0.22790  |
| C  | 3.97164  | -0.29909 | 0.32214  |
| C  | 5.07180  | 0.51357  | 0.05269  |
| C  | 4.85974  | 1.84823  | -0.34845 |
| C  | 3.58004  | 2.33725  | -0.38715 |
| Mn | 0.89122  | -0.94363 | 0.19389  |
| C  | 0.82603  | -0.47158 | -1.80656 |
| O  | 1.92655  | -0.81559 | -2.53149 |
| C  | 4.22996  | -1.72451 | 0.72343  |

|   |          |          |          |
|---|----------|----------|----------|
| C | -6.39467 | -0.48568 | -0.86477 |
| C | 1.56503  | -2.54077 | -0.25124 |
| O | 1.87194  | -3.60618 | -0.57066 |
| C | 0.97475  | -1.24180 | 1.99400  |
| O | 1.01516  | -1.45548 | 3.12313  |
| C | -0.66293 | -1.80242 | -0.00057 |
| O | -1.59606 | -2.46599 | -0.15893 |
| O | -0.06715 | 0.09209  | -2.42853 |
| H | -1.65285 | -0.39601 | 1.64805  |
| H | -2.60668 | 1.00783  | 2.15030  |
| H | 3.40203  | 3.37486  | -0.66790 |
| H | -2.41467 | 3.14209  | 0.98684  |
| H | 1.53296  | 4.04029  | -0.48296 |
| H | -0.74688 | 4.81460  | 0.04072  |
| H | 6.07875  | 0.10403  | 0.14301  |
| H | 5.70535  | 2.49091  | -0.60615 |
| H | -4.31871 | -0.18644 | -2.71830 |
| H | -1.86054 | 0.36525  | -1.52083 |
| H | -7.01303 | 0.33901  | -0.48812 |
| H | -6.65964 | -1.41696 | -0.34819 |
| H | -6.56896 | -0.60734 | -1.93903 |
| H | 5.26293  | -1.83370 | 1.08049  |
| H | 3.55002  | -2.05385 | 1.52031  |
| H | 4.10490  | -2.40500 | -0.13094 |
| C | -5.02369 | -0.02936 | 1.84931  |
| H | 1.76170  | -0.50782 | -3.44136 |
| H | -6.07127 | -0.33902 | 1.76695  |
| H | -4.49542 | -0.73993 | 2.50090  |
| H | -4.98833 | 0.96335  | 2.32299  |

### 2<sub>C5</sub>(I6-R)

|                  |   |                               |
|------------------|---|-------------------------------|
| Energy           | = | -2938.865499                  |
| Enthalpy 0K      | = | -2938.346485                  |
| Enthalpy 298K    | = | -2938.303286                  |
| Free Energy 298K | = | -2938.422685                  |
| Nimag            | = | 0 (21.0076 cm <sup>-1</sup> ) |

|   |          |          |          |
|---|----------|----------|----------|
| C | 3.41853  | -0.34247 | 2.87369  |
| C | 2.53587  | -0.43277 | 1.75609  |
| N | 3.04223  | -0.67288 | 0.49177  |
| C | 4.34664  | -0.98710 | 0.35761  |
| C | 5.22831  | -0.97588 | 1.43662  |
| C | 4.75394  | -0.60233 | 2.71051  |
| C | 1.12256  | -0.35103 | 1.88296  |
| N | 0.37255  | -0.44166 | 0.71903  |
| C | -0.96075 | -0.60347 | 0.83043  |
| C | -1.63254 | -0.61574 | 2.04159  |
| C | -0.89077 | -0.40897 | 3.22931  |
| C | 0.46611  | -0.27718 | 3.14965  |
| C | -1.74763 | -0.73712 | -0.45737 |
| N | -3.05157 | -1.35716 | -0.28490 |
| C | -4.24139 | -0.69012 | -0.08105 |
| C | -5.20198 | -1.64316 | 0.03937  |
| N | -4.58172 | -2.86893 | -0.09246 |
| C | -3.27178 | -2.68012 | -0.28500 |
| C | -5.25489 | -4.15927 | -0.03886 |

|    |          |          |          |
|----|----------|----------|----------|
| Mn | 1.60346  | -0.23739 | -0.99901 |
| C  | 0.39558  | 0.26832  | -2.20008 |
| O  | -0.28741 | 0.62147  | -3.06850 |
| C  | 4.89245  | -1.36180 | -0.99193 |
| C  | 1.91913  | 1.70799  | -0.43783 |
| O  | 2.96690  | 2.30099  | -0.32009 |
| C  | 2.73559  | 0.08975  | -2.35264 |
| O  | 3.35532  | 0.37161  | -3.28150 |
| C  | 1.43106  | -2.02210 | -1.37825 |
| O  | 1.33472  | -3.13716 | -1.63248 |
| O  | 0.78012  | 2.50502  | -0.15582 |
| O  | -1.57617 | 2.75340  | -1.51798 |
| O  | -1.24185 | 2.61850  | 1.86735  |
| O  | -2.26191 | 5.42295  | -1.18629 |
| O  | -3.62170 | 2.30366  | 0.31190  |
| O  | -2.97536 | 4.72635  | 1.39651  |
| H  | -6.27160 | -1.56084 | 0.20960  |
| H  | -1.91281 | 0.25571  | -0.89660 |
| H  | -1.18941 | -1.33426 | -1.18534 |
| H  | 3.03126  | -0.07419 | 3.85612  |
| H  | -2.71339 | -0.74398 | 2.07913  |
| H  | 1.05306  | -0.14445 | 4.05797  |
| H  | -1.39870 | -0.36421 | 4.19516  |
| H  | 6.27490  | -1.23940 | 1.27845  |
| H  | 5.43807  | -0.53787 | 3.56030  |
| C  | -2.23993 | -3.72383 | -0.48207 |
| H  | 5.82857  | -1.92415 | -0.87478 |
| H  | 4.18653  | -1.97940 | -1.56276 |
| H  | 5.12266  | -0.46653 | -1.58732 |
| H  | -4.27602 | 0.39859  | -0.00552 |
| H  | -0.71958 | 2.60470  | -1.05867 |
| H  | -3.00683 | 2.43379  | -0.43367 |
| H  | -3.63812 | 3.19250  | 0.73063  |
| H  | -1.96994 | 4.52363  | -1.43245 |
| H  | -3.08323 | 5.54257  | -1.67911 |
| H  | -0.47523 | 2.37165  | 1.32651  |
| H  | -1.97781 | 2.12664  | 1.46416  |
| H  | -2.19959 | 4.19382  | 1.65969  |
| H  | -2.71063 | 5.10501  | 0.53286  |
| H  | -1.46996 | 2.34341  | -2.38675 |
| H  | 1.12357  | 3.39550  | 0.05028  |
| H  | -5.09718 | -4.70494 | -0.97762 |
| H  | -4.87263 | -4.74847 | 0.80448  |
| H  | -6.32633 | -3.98072 | 0.10099  |
| H  | -2.64256 | -4.71462 | -0.24333 |
| H  | -1.89646 | -3.72599 | -1.52768 |
| H  | -1.37350 | -3.52834 | 0.16500  |

### 2<sub>C5</sub>(TS3)

|                  |   |                                 |
|------------------|---|---------------------------------|
| Energy           | = | -2938.844435                    |
| Enthalpy 0K      | = | -2938.330007                    |
| Enthalpy 298K    | = | -2938.287276                    |
| Free Energy 298K | = | -2938.405651                    |
| Nimag            | = | 1 (-201.0375 cm <sup>-1</sup> ) |

|   |         |          |         |
|---|---------|----------|---------|
| C | 3.53755 | -0.25821 | 2.84164 |
| C | 2.64369 | -0.31818 | 1.73129 |

|    |          |          |          |
|----|----------|----------|----------|
| N  | 3.14344  | -0.46812 | 0.44756  |
| C  | 4.46259  | -0.72251 | 0.28168  |
| C  | 5.35133  | -0.73676 | 1.34992  |
| C  | 4.87814  | -0.45652 | 2.65057  |
| C  | 1.23013  | -0.29074 | 1.87832  |
| N  | 0.46856  | -0.38965 | 0.72415  |
| C  | -0.85983 | -0.58691 | 0.84926  |
| C  | -1.51190 | -0.62313 | 2.07002  |
| C  | -0.76253 | -0.40656 | 3.24856  |
| C  | 0.59073  | -0.24826 | 3.15374  |
| C  | -1.67121 | -0.74947 | -0.41921 |
| N  | -2.86877 | -1.55701 | -0.23762 |
| C  | -4.13815 | -1.08388 | 0.02261  |
| C  | -4.94381 | -2.17385 | 0.11837  |
| N  | -4.15341 | -3.28681 | -0.08328 |
| C  | -2.89215 | -2.89697 | -0.29514 |
| C  | -4.62649 | -4.66394 | -0.07496 |
| Mn | 1.66170  | -0.03807 | -0.98920 |
| C  | 0.36660  | 0.44195  | -2.16152 |
| O  | -0.34412 | 0.73152  | -3.01600 |
| C  | 5.00690  | -0.99309 | -1.09228 |
| C  | 1.91994  | 1.81921  | -0.34978 |
| O  | 2.52636  | 2.70221  | 0.04724  |
| C  | 2.74051  | 0.34309  | -2.38682 |
| O  | 3.30806  | 0.62968  | -3.34349 |
| C  | 1.59325  | -1.82404 | -1.42840 |
| O  | 1.58923  | -2.93729 | -1.68627 |
| O  | -0.04266 | 2.78252  | -0.61844 |
| O  | -2.28899 | 2.48574  | -1.54605 |
| O  | -1.20315 | 2.68922  | 1.74987  |
| O  | -3.27121 | 4.96906  | -1.15377 |
| O  | -3.80846 | 1.86427  | 0.61379  |
| O  | -3.33503 | 4.40126  | 1.56795  |
| H  | -6.00828 | -2.25940 | 0.31697  |
| H  | -1.98304 | 0.23500  | -0.79806 |
| H  | -1.07115 | -1.23522 | -1.19407 |
| H  | 3.15229  | -0.06670 | 3.84234  |
| H  | -2.58865 | -0.77756 | 2.11843  |
| H  | 1.18645  | -0.10800 | 4.05484  |
| H  | -1.25927 | -0.38003 | 4.22081  |
| H  | 6.40533  | -0.94944 | 1.16757  |
| H  | 5.56971  | -0.41673 | 3.49550  |
| C  | -1.72432 | -3.76636 | -0.56657 |
| H  | 5.98619  | -1.48371 | -1.01642 |
| H  | 4.34367  | -1.64345 | -1.67827 |
| H  | 5.15554  | -0.05738 | -1.65051 |
| H  | -4.32480 | -0.01681 | 0.16306  |
| H  | -1.27426 | 2.59614  | -1.18583 |
| H  | -3.33042 | 2.05086  | -0.22293 |
| H  | -3.86223 | 2.74933  | 1.03141  |
| H  | -2.90021 | 4.09092  | -1.40625 |
| H  | -4.20156 | 4.90051  | -1.39987 |
| H  | -0.68703 | 2.73828  | 0.89533  |
| H  | -1.87033 | 2.01524  | 1.54852  |
| H  | -2.46894 | 3.95745  | 1.70661  |
| H  | -3.27950 | 4.72898  | 0.64687  |
| H  | -2.23337 | 2.09565  | -2.42470 |

|   |          |          |          |
|---|----------|----------|----------|
| H | 0.21105  | 3.70052  | -0.77437 |
| H | -4.43723 | -5.13363 | -1.04845 |
| H | -4.12158 | -5.23043 | 0.71779  |
| H | -5.70395 | -4.65243 | 0.11918  |
| H | -1.97067 | -4.81747 | -0.37998 |
| H | -1.40971 | -3.66084 | -1.61593 |
| H | -0.88127 | -3.48153 | 0.07843  |

### 2<sub>C5</sub>(I7-R)

|                  |   |                               |
|------------------|---|-------------------------------|
| Energy           | = | -2938.852710                  |
| Enthalpy 0K      | = | -2938.336382                  |
| Enthalpy 298K    | = | -2938.292913                  |
| Free Energy 298K | = | -2938.414128                  |
| Nimag            | = | 0 (15.3536 cm <sup>-1</sup> ) |

|    |          |          |          |
|----|----------|----------|----------|
| C  | 3.68755  | -0.20031 | 2.84285  |
| C  | 2.80792  | -0.17521 | 1.72059  |
| N  | 3.32750  | -0.14259 | 0.43492  |
| C  | 4.66317  | -0.27779 | 0.25758  |
| C  | 5.54118  | -0.36633 | 1.33007  |
| C  | 5.03931  | -0.28889 | 2.64860  |
| C  | 1.39359  | -0.24701 | 1.84517  |
| N  | 0.66180  | -0.33428 | 0.67155  |
| C  | -0.65112 | -0.63692 | 0.74983  |
| C  | -1.32328 | -0.76267 | 1.95277  |
| C  | -0.61900 | -0.53921 | 3.15658  |
| C  | 0.72558  | -0.29705 | 3.10533  |
| C  | -1.42949 | -0.83749 | -0.53558 |
| N  | -2.45982 | -1.86140 | -0.40606 |
| C  | -3.80464 | -1.63725 | -0.19691 |
| C  | -4.39306 | -2.85998 | -0.12170 |
| N  | -3.40044 | -3.80356 | -0.28472 |
| C  | -2.22857 | -3.18192 | -0.45313 |
| C  | -3.60405 | -5.24522 | -0.28212 |
| Mn | 1.81915  | 0.35780  | -0.94417 |
| C  | 0.45594  | 0.87266  | -2.03593 |
| O  | -0.29794 | 1.23574  | -2.81753 |
| C  | 5.23468  | -0.31726 | -1.13081 |
| C  | 1.86949  | 2.06386  | -0.10965 |
| O  | 2.03509  | 3.08526  | 0.35680  |
| C  | 2.86460  | 0.99836  | -2.28343 |
| O  | 3.40771  | 1.43819  | -3.19179 |
| C  | 1.91616  | -1.38387 | -1.60850 |
| O  | 2.01966  | -2.45182 | -1.98921 |
| O  | -0.93443 | 2.55727  | 0.31098  |
| O  | -2.82346 | 2.01867  | -1.30124 |
| O  | -2.94104 | 2.06484  | 2.14844  |
| O  | -3.73164 | 4.45204  | -1.11134 |
| O  | -4.79389 | 1.24188  | 0.17556  |
| O  | -4.92927 | 3.80324  | 1.26859  |
| H  | -5.42991 | -3.14355 | 0.03428  |
| H  | -1.93406 | 0.10171  | -0.82830 |
| H  | -0.76646 | -1.14602 | -1.35043 |
| H  | 3.28190  | -0.17059 | 3.85335  |
| H  | -2.38773 | -0.99165 | 1.96810  |
| H  | 1.28890  | -0.14742 | 4.02574  |

|   |          |          |          |
|---|----------|----------|----------|
| H | -1.14202 | -0.57183 | 4.11463  |
| H | 6.60901  | -0.47934 | 1.13985  |
| H | 5.72018  | -0.31808 | 3.50251  |
| C | -0.90985 | -3.81797 | -0.67375 |
| H | 6.25161  | -0.73000 | -1.10555 |
| H | 4.63388  | -0.93500 | -1.81171 |
| H | 5.30687  | 0.69512  | -1.55456 |
| H | -4.22180 | -0.63296 | -0.09014 |
| H | -1.62953 | 2.32753  | -0.40048 |
| H | -4.08579 | 1.50875  | -0.48798 |
| H | -5.11266 | 2.10181  | 0.51096  |
| H | -3.34957 | 3.52751  | -1.24176 |
| H | -4.45738 | 4.48817  | -1.74482 |
| H | -2.14004 | 2.23565  | 1.60660  |
| H | -3.48896 | 1.53031  | 1.54226  |
| H | -4.17756 | 3.38103  | 1.73105  |
| H | -4.51208 | 4.14492  | 0.44615  |
| H | -2.62633 | 1.77586  | -2.21116 |
| H | -0.81748 | 3.51004  | 0.22502  |
| H | -3.28742 | -5.67215 | -1.24207 |
| H | -3.03486 | -5.70422 | 0.53624  |
| H | -4.67142 | -5.43975 | -0.13342 |
| H | -0.95612 | -4.89124 | -0.45748 |
| H | -0.59647 | -3.68496 | -1.72031 |
| H | -0.15176 | -3.35962 | -0.02336 |

### 2<sub>C5</sub><sup>+</sup>(I8)

|                  |   |                               |
|------------------|---|-------------------------------|
| Energy           | = | -2481.163028                  |
| Enthalpy 0K      | = | -2480.788955                  |
| Enthalpy 298K    | = | -2480.759371                  |
| Free Energy 298K | = | -2480.849322                  |
| Nimag            | = | 0 (26.1107 cm <sup>-1</sup> ) |

|    |          |          |          |
|----|----------|----------|----------|
| C  | 3.82385  | 1.93214  | -0.58423 |
| C  | 2.63181  | 1.24311  | -0.21522 |
| N  | 2.66466  | -0.12124 | 0.01442  |
| C  | 3.86093  | -0.75659 | 0.04910  |
| C  | 5.04877  | -0.09828 | -0.24380 |
| C  | 5.01833  | 1.26352  | -0.60720 |
| C  | 1.39254  | 1.90652  | -0.00212 |
| N  | 0.31251  | 1.12981  | 0.40013  |
| C  | -0.80542 | 1.76572  | 0.82666  |
| C  | -0.95428 | 3.13912  | 0.80095  |
| C  | 0.09108  | 3.93603  | 0.27143  |
| C  | 1.24646  | 3.32250  | -0.12025 |
| C  | -1.98555 | 0.97140  | 1.32106  |
| N  | -2.92461 | 0.65600  | 0.23699  |
| C  | -2.74474 | 0.88785  | -1.11029 |
| C  | -3.83379 | 0.37907  | -1.74334 |
| N  | -4.65667 | -0.15088 | -0.77445 |
| C  | -4.09267 | 0.02557  | 0.42594  |
| C  | -4.61379 | -0.43518 | 1.73112  |
| C  | -5.93060 | -0.81168 | -1.02373 |
| Mn | 0.71428  | -0.91367 | 0.05426  |
| C  | -0.97374 | -1.57858 | 0.03818  |
| O  | -1.97468 | -2.13696 | -0.00520 |
| C  | 3.93384  | -2.21364 | 0.40538  |

|   |          |          |          |
|---|----------|----------|----------|
| C | 0.61679  | -0.51385 | -1.78502 |
| O | 0.56128  | -0.28353 | -2.89560 |
| C | 1.14197  | -2.64564 | -0.32323 |
| O | 1.26483  | -3.75378 | -0.58061 |
| C | 0.90395  | -1.12051 | 1.91163  |
| O | 1.03214  | -1.19613 | 3.03773  |
| H | -4.09743 | 0.35223  | -2.79667 |
| H | -1.68192 | 0.03633  | 1.80918  |
| H | -2.52946 | 1.56641  | 2.06570  |
| H | 3.78842  | 2.99182  | -0.83203 |
| H | -1.88078 | 3.58565  | 1.16317  |
| H | -1.86802 | 1.39308  | -1.50353 |
| H | 2.07082  | 3.92014  | -0.50724 |
| H | -0.02013 | 5.01924  | 0.19275  |
| H | 5.98925  | -0.64839 | -0.20077 |
| H | 5.93826  | 1.78414  | -0.88285 |
| H | 4.95729  | -2.47119 | 0.70750  |
| H | 3.26160  | -2.47374 | 1.23404  |
| H | 3.68605  | -2.84583 | -0.45951 |
| H | -6.73682 | -0.28481 | -0.49813 |
| H | -6.12285 | -0.78456 | -2.10130 |
| H | -5.88295 | -1.85500 | -0.68728 |
| H | -5.66280 | -0.73962 | 1.64578  |
| H | -4.02463 | -1.29447 | 2.08745  |
| H | -4.53503 | 0.36615  | 2.47878  |

### 2<sub>C5</sub><sup>+</sup>(I5-P)

|                  |                                 |
|------------------|---------------------------------|
| Energy           | = -2938.770832                  |
| Enthalpy 0K      | = -2938.248227                  |
| Enthalpy 298K    | = -2938.205393                  |
| Free Energy 298K | = -2938.323608                  |
| Nimag            | = 0 (17.8131 cm <sup>-1</sup> ) |

|    |          |          |          |
|----|----------|----------|----------|
| C  | 3.33703  | -0.09274 | 2.84808  |
| C  | 2.49476  | -0.37312 | 1.77693  |
| N  | 2.96234  | -0.78831 | 0.58049  |
| C  | 4.26984  | -1.07651 | 0.45472  |
| C  | 5.16190  | -0.84294 | 1.50972  |
| C  | 4.70201  | -0.31056 | 2.70128  |
| C  | 1.02001  | -0.30505 | 1.90801  |
| N  | 0.30592  | -0.40917 | 0.76859  |
| C  | -1.03449 | -0.49090 | 0.85974  |
| C  | -1.69760 | -0.44360 | 2.08381  |
| C  | -0.96460 | -0.30041 | 3.25135  |
| C  | 0.41535  | -0.23825 | 3.16308  |
| C  | -1.83129 | -0.62186 | -0.41998 |
| N  | -3.16845 | -1.15090 | -0.21887 |
| C  | -4.32000 | -0.40689 | -0.05593 |
| C  | -5.33446 | -1.29733 | 0.09228  |
| N  | -4.78552 | -2.56150 | 0.01718  |
| C  | -3.46635 | -2.45924 | -0.16839 |
| C  | -5.53395 | -3.80763 | 0.11676  |
| Mn | 1.54385  | -0.44920 | -0.97921 |
| C  | 0.37209  | 0.04750  | -2.22981 |
| O  | -0.28221 | 0.38762  | -3.11821 |
| C  | 4.80406  | -1.66847 | -0.81360 |

|   |          |          |          |
|---|----------|----------|----------|
| C | 2.03715  | 1.51223  | -0.66095 |
| O | 3.14264  | 1.98697  | -0.54588 |
| C | 2.68547  | -0.37590 | -2.36907 |
| O | 3.31457  | -0.26120 | -3.32331 |
| C | 1.23337  | -2.25277 | -1.19388 |
| O | 1.06221  | -3.37238 | -1.36391 |
| O | 0.98882  | 2.45576  | -0.57532 |
| O | -1.45688 | 2.79213  | -1.77849 |
| O | -0.77158 | 2.65544  | 1.69909  |
| O | -3.22855 | 2.43997  | 0.32470  |
| O | -1.86745 | 5.50224  | -1.26516 |
| O | -2.48530 | 4.84789  | 1.34574  |
| H | -6.39916 | -1.14702 | 0.24665  |
| H | -1.92983 | 0.36274  | -0.89699 |
| H | -1.31597 | -1.28346 | -1.12326 |
| H | 2.94028  | 0.29041  | 3.78638  |
| H | -2.78417 | -0.51031 | 2.12386  |
| H | 1.01741  | -0.16729 | 4.06687  |
| H | -1.46379 | -0.25307 | 4.22023  |
| H | 6.21766  | -1.08010 | 1.37144  |
| H | 5.38941  | -0.09127 | 3.52019  |
| C | -2.49447 | -3.56730 | -0.30961 |
| H | 5.70585  | -2.25563 | -0.59530 |
| H | 4.06990  | -2.32386 | -1.29808 |
| H | 5.09455  | -0.87826 | -1.52084 |
| H | -4.28506 | 0.68297  | -0.02119 |
| H | -0.56301 | 2.58875  | -1.42974 |
| H | -2.74072 | 2.56393  | -0.51084 |
| H | -3.21878 | 3.34068  | 0.72124  |
| H | -1.69557 | 4.59646  | -1.58597 |
| H | -2.68667 | 5.75594  | -1.70828 |
| H | -0.10279 | 2.51019  | 1.01199  |
| H | -1.58430 | 2.28607  | 1.30696  |
| H | -1.71037 | 4.31316  | 1.60137  |
| H | -2.23686 | 5.20655  | 0.46785  |
| H | -1.48453 | 2.40694  | -2.66414 |
| H | 1.41447  | 3.33090  | -0.48363 |
| H | -5.39130 | -4.40420 | -0.79284 |
| H | -5.20079 | -4.37651 | 0.99414  |
| H | -6.59501 | -3.56018 | 0.22569  |
| H | -2.95119 | -4.52087 | -0.02223 |
| H | -2.15266 | -3.64119 | -1.35333 |
| H | -1.61841 | -3.38845 | 0.32922  |

### 2<sub>C5</sub><sup>+</sup>(TS4)

|                  |                                   |
|------------------|-----------------------------------|
| Energy           | = -2938.744779                    |
| Enthalpy 0K      | = -2938.227826                    |
| Enthalpy 298K    | = -2938.185314                    |
| Free Energy 298K | = -2938.302688                    |
| Nimag            | = 1 (-272.1155 cm <sup>-1</sup> ) |

|   |         |          |         |
|---|---------|----------|---------|
| C | 3.46647 | -0.17182 | 2.85273 |
| C | 2.62334 | -0.30769 | 1.75391 |
| N | 3.09736 | -0.56278 | 0.51295 |
| C | 4.41222 | -0.81224 | 0.34956 |
| C | 5.29910 | -0.71532 | 1.42821 |
| C | 4.83192 | -0.35970 | 2.68103 |

|    |          |          |          |
|----|----------|----------|----------|
| C  | 1.14725  | -0.25803 | 1.89643  |
| N  | 0.42360  | -0.37543 | 0.76226  |
| C  | -0.91161 | -0.50421 | 0.86440  |
| C  | -1.56491 | -0.46618 | 2.09492  |
| C  | -0.82893 | -0.27700 | 3.25201  |
| C  | 0.54936  | -0.18567 | 3.15284  |
| C  | -1.72708 | -0.68150 | -0.39616 |
| N  | -2.97084 | -1.40187 | -0.17824 |
| C  | -4.20703 | -0.84000 | 0.07191  |
| C  | -5.08084 | -1.87175 | 0.19639  |
| N  | -4.36573 | -3.03906 | 0.01948  |
| C  | -3.08311 | -2.74023 | -0.20469 |
| C  | -4.92926 | -4.38191 | 0.06680  |
| Mn | 1.63848  | -0.18581 | -0.98936 |
| C  | 0.36066  | 0.26926  | -2.21544 |
| O  | -0.33280 | 0.51268  | -3.09172 |
| C  | 4.96110  | -1.20427 | -0.98745 |
| C  | 1.98675  | 1.69250  | -0.52599 |
| O  | 2.59178  | 2.59669  | -0.18830 |
| C  | 2.73618  | 0.01888  | -2.42104 |
| O  | 3.31306  | 0.18459  | -3.39632 |
| C  | 1.48870  | -2.00774 | -1.31685 |
| O  | 1.44707  | -3.12758 | -1.52325 |
| O  | 0.02885  | 2.72065  | -0.98230 |
| O  | -2.28857 | 2.44956  | -1.63076 |
| O  | -0.75852 | 2.69446  | 1.54047  |
| O  | -3.46799 | 2.02776  | 0.75350  |
| O  | -2.97449 | 5.02254  | -1.19600 |
| O  | -2.79978 | 4.57720  | 1.53088  |
| H  | -6.14772 | -1.88247 | 0.40015  |
| H  | -1.97298 | 0.30279  | -0.82493 |
| H  | -1.15665 | -1.24373 | -1.13966 |
| H  | 3.07241  | 0.07112  | 3.83709  |
| H  | -2.64806 | -0.56501 | 2.14327  |
| H  | 1.15085  | -0.07865 | 4.05261  |
| H  | -1.32157 | -0.22063 | 4.22372  |
| H  | 6.35744  | -0.91885 | 1.26115  |
| H  | 5.51549  | -0.25352 | 3.52508  |
| C  | -1.97405 | -3.68876 | -0.45644 |
| H  | 5.92210  | -1.71715 | -0.85458 |
| H  | 4.28451  | -1.87817 | -1.52780 |
| H  | 5.15147  | -0.31588 | -1.60698 |
| H  | -4.32333 | 0.23763  | 0.19281  |
| H  | -1.20785 | 2.55218  | -1.39630 |
| H  | -3.13765 | 2.16179  | -0.16330 |
| H  | -3.47266 | 2.93784  | 1.11898  |
| H  | -2.73483 | 4.10425  | -1.46589 |
| H  | -3.92432 | 5.06860  | -1.35887 |
| H  | -0.39054 | 2.74835  | 0.61492  |
| H  | -1.56384 | 2.16821  | 1.40543  |
| H  | -1.94256 | 4.11114  | 1.61875  |
| H  | -2.81277 | 4.85942  | 0.59202  |
| H  | -2.37261 | 2.06248  | -2.50837 |
| H  | 0.30757  | 3.60663  | -1.24314 |
| H  | -4.77623 | -4.88748 | -0.89485 |
| H  | -4.45716 | -4.95850 | 0.87225  |
| H  | -6.00245 | -4.29462 | 0.26474  |

|   |          |          |          |
|---|----------|----------|----------|
| H | -2.29753 | -4.72066 | -0.28205 |
| H | -1.63038 | -3.59946 | -1.49825 |
| H | -1.12730 | -3.46642 | 0.20881  |

### 2<sub>C5</sub><sup>+</sup>(16-P)

|                  |   |                               |
|------------------|---|-------------------------------|
| Energy           | = | -2938.751822                  |
| Enthalpy 0K      | = | -2938.231381                  |
| Enthalpy 298K    | = | -2938.188590                  |
| Free Energy 298K | = | -2938.305407                  |
| Nimag            | = | 0 (20.5365 cm <sup>-1</sup> ) |

|    |          |          |          |
|----|----------|----------|----------|
| C  | 3.51943  | -0.52213 | 2.82476  |
| C  | 2.66355  | -0.51928 | 1.72715  |
| N  | 3.12141  | -0.64672 | 0.46030  |
| C  | 4.43471  | -0.88174 | 0.25592  |
| C  | 5.33168  | -0.91570 | 1.32952  |
| C  | 4.87984  | -0.70655 | 2.62017  |
| C  | 1.19157  | -0.44706 | 1.89810  |
| N  | 0.44418  | -0.45881 | 0.77288  |
| C  | -0.89356 | -0.55499 | 0.88920  |
| C  | -1.52186 | -0.58627 | 2.13386  |
| C  | -0.76079 | -0.50428 | 3.28624  |
| C  | 0.61823  | -0.44666 | 3.16746  |
| C  | -1.73886 | -0.60653 | -0.36135 |
| N  | -3.01531 | -1.27711 | -0.16551 |
| C  | -4.21001 | -0.67014 | 0.16751  |
| C  | -5.14341 | -1.65499 | 0.21604  |
| N  | -4.50559 | -2.84020 | -0.08918 |
| C  | -3.21116 | -2.59710 | -0.31500 |
| C  | -5.15022 | -4.14514 | -0.16109 |
| Mn | 1.63268  | -0.14680 | -0.97491 |
| C  | 0.32777  | 0.35850  | -2.16541 |
| O  | -0.36768 | 0.62306  | -3.03038 |
| C  | 4.97403  | -1.11290 | -1.12137 |
| C  | 2.01054  | 1.64306  | -0.43226 |
| O  | 2.41595  | 2.64727  | -0.10128 |
| C  | 2.69350  | 0.10913  | -2.43651 |
| O  | 3.23160  | 0.30410  | -3.42611 |
| C  | 1.43677  | -1.96715 | -1.38322 |
| O  | 1.35215  | -3.07424 | -1.62386 |
| O  | -0.25001 | 3.10616  | -1.34331 |
| O  | -2.67290 | 2.26117  | -1.30618 |
| O  | -0.47474 | 2.56691  | 1.35179  |
| O  | -3.23259 | 2.03393  | 1.19504  |
| O  | -2.47580 | 4.83223  | -0.99404 |
| O  | -2.37024 | 4.63144  | 1.73459  |
| H  | -6.20441 | -1.62102 | 0.44609  |
| H  | -1.95696 | 0.42032  | -0.72473 |
| H  | -1.21329 | -1.15261 | -1.14893 |
| H  | 3.13799  | -0.39059 | 3.83441  |
| H  | -2.60618 | -0.65185 | 2.19718  |
| H  | 1.23592  | -0.41984 | 4.06198  |
| H  | -1.23407 | -0.50310 | 4.26919  |
| H  | 6.38675  | -1.10439 | 1.12877  |
| H  | 5.57142  | -0.70769 | 3.46438  |
| C  | -2.16909 | -3.58340 | -0.68042 |

|   |          |          |          |
|---|----------|----------|----------|
| H | 5.96407  | -1.58096 | -1.05602 |
| H | 4.32478  | -1.77189 | -1.71164 |
| H | 5.10116  | -0.15976 | -1.65465 |
| H | -4.26088 | 0.39260  | 0.40055  |
| H | -1.14779 | 2.66628  | -1.47138 |
| H | -3.10405 | 2.12365  | 0.19941  |
| H | -3.20234 | 2.95952  | 1.50440  |
| H | -2.69549 | 3.86633  | -1.18665 |
| H | -3.12504 | 5.35773  | -1.47361 |
| H | -0.33671 | 2.76740  | 0.39915  |
| H | -1.35464 | 2.14098  | 1.35450  |
| H | -1.54697 | 4.10869  | 1.75677  |
| H | -2.44972 | 4.84340  | 0.77934  |
| H | -3.19331 | 1.92483  | -2.04276 |
| H | -0.51006 | 4.03839  | -1.34991 |
| H | -5.04309 | -4.56170 | -1.17046 |
| H | -4.70303 | -4.82592 | 0.57427  |
| H | -6.21329 | -4.01397 | 0.06601  |
| H | -2.55484 | -4.60491 | -0.59174 |
| H | -1.84002 | -3.42189 | -1.71815 |
| H | -1.29798 | -3.47652 | -0.01829 |

### **2<sub>C5</sub><sup>2+</sup>(I7-P)**

|                  |   |                               |
|------------------|---|-------------------------------|
| Energy           | = | -2481.054865                  |
| Enthalpy 0K      | = | -2480.676807                  |
| Enthalpy 298K    | = | -2480.647958                  |
| Free Energy 298K | = | -2480.734663                  |
| Nimag            | = | 0 (23.8823 cm <sup>-1</sup> ) |

|    |          |          |          |
|----|----------|----------|----------|
| C  | 3.78808  | 1.98774  | -0.57689 |
| C  | 2.65645  | 1.26830  | -0.20630 |
| N  | 2.69221  | -0.06873 | 0.00403  |
| C  | 3.87845  | -0.70990 | -0.04226 |
| C  | 5.04890  | -0.02472 | -0.38994 |
| C  | 5.00300  | 1.32418  | -0.68900 |
| C  | 1.35817  | 1.94366  | 0.04102  |
| N  | 0.31885  | 1.15916  | 0.40032  |
| C  | -0.83549 | 1.75217  | 0.76998  |
| C  | -1.00228 | 3.13436  | 0.72582  |
| C  | 0.04104  | 3.93799  | 0.29383  |
| C  | 1.24122  | 3.33272  | -0.03734 |
| C  | -2.01175 | 0.94797  | 1.25812  |
| N  | -2.94606 | 0.62211  | 0.17853  |
| C  | -2.75122 | 0.79360  | -1.17637 |
| C  | -3.85450 | 0.29859  | -1.79454 |
| N  | -4.69970 | -0.16367 | -0.81034 |
| C  | -4.13731 | 0.03909  | 0.38575  |
| C  | -4.68636 | -0.33166 | 1.70808  |
| C  | -6.00006 | -0.77957 | -1.04230 |
| Mn | 0.74776  | -0.91356 | 0.10487  |
| C  | -0.94154 | -1.60531 | 0.11407  |
| O  | -1.93460 | -2.17107 | 0.07949  |
| C  | 3.98787  | -2.16868 | 0.27553  |
| C  | 0.62787  | -0.62019 | -1.75658 |
| O  | 0.57337  | -0.46558 | -2.87859 |
| C  | 1.18092  | -2.66968 | -0.20218 |

|   |          |          |          |
|---|----------|----------|----------|
| O | 1.29758  | -3.78771 | -0.39801 |
| C | 0.96124  | -1.09120 | 1.97618  |
| O | 1.10086  | -1.17428 | 3.09794  |
| H | -4.11441 | 0.23998  | -2.84755 |
| H | -1.70024 | 0.02457  | 1.76114  |
| H | -2.55559 | 1.54609  | 2.00045  |
| H | 3.73980  | 3.05608  | -0.77375 |
| H | -1.95643 | 3.56389  | 1.03284  |
| H | -1.85973 | 1.25784  | -1.58623 |
| H | 2.08401  | 3.94758  | -0.34331 |
| H | -0.07007 | 5.02160  | 0.23613  |
| H | 5.98981  | -0.57469 | -0.42386 |
| H | 5.90361  | 1.86526  | -0.98377 |
| H | 5.03001  | -2.41440 | 0.51480  |
| H | 3.36782  | -2.45472 | 1.13443  |
| H | 3.70579  | -2.77862 | -0.59477 |
| H | -6.78479 | -0.19660 | -0.54446 |
| H | -6.18413 | -0.78888 | -2.12146 |
| H | -5.99883 | -1.80897 | -0.66284 |
| H | -5.70341 | -0.72627 | 1.61074  |
| H | -4.05160 | -1.09776 | 2.17825  |
| H | -4.70661 | 0.54715  | 2.36891  |

### **3<sub>C2</sub>(I5-R)**

|                  |   |                               |
|------------------|---|-------------------------------|
| Energy           | = | -2635.616851                  |
| Enthalpy 0K      | = | -2635.171397                  |
| Enthalpy 298K    | = | -2635.137441                  |
| Free Energy 298K | = | -2635.237241                  |
| Nimag            | = | 0 (16.9206 cm <sup>-1</sup> ) |

|    |          |          |          |
|----|----------|----------|----------|
| C  | -3.65254 | 0.04380  | 1.18981  |
| N  | -3.15687 | -0.29107 | -0.00889 |
| C  | -4.18649 | -0.37497 | -0.93802 |
| C  | -5.33964 | -0.08859 | -0.26362 |
| N  | -4.97655 | 0.16724  | 1.05261  |
| C  | -1.74592 | -0.48390 | -0.30196 |
| C  | -0.98795 | 0.81308  | -0.49155 |
| N  | 0.35005  | 0.75022  | -0.38984 |
| C  | 1.07365  | 1.93162  | -0.44035 |
| C  | 0.41240  | 3.15581  | -0.76969 |
| C  | -0.94520 | 3.18090  | -0.93253 |
| C  | -1.68335 | 1.98631  | -0.75206 |
| Mn | 1.65371  | -0.93076 | -0.37074 |
| C  | 1.12515  | -1.27244 | 1.58020  |
| O  | 1.81665  | -2.26208 | 2.22784  |
| C  | 2.44938  | 1.86741  | -0.08425 |
| N  | 2.95388  | 0.62920  | 0.27942  |
| C  | 4.19268  | 0.55938  | 0.80972  |
| C  | 5.01682  | 1.67727  | 0.92888  |
| C  | 4.56000  | 2.92505  | 0.45797  |
| C  | 3.28691  | 3.02267  | -0.03894 |
| C  | 4.72619  | -0.76317 | 1.28243  |
| C  | -3.94422 | -0.70991 | -2.36654 |
| C  | -5.91585 | 0.52131  | 2.10218  |
| C  | -6.75518 | -0.02917 | -0.71385 |
| C  | -2.87347 | 0.27995  | 2.42859  |

|   |          |          |          |
|---|----------|----------|----------|
| C | 2.83947  | -2.27490 | -0.38355 |
| O | 3.51153  | -3.20713 | -0.48295 |
| C | 0.52844  | -2.22239 | -0.86638 |
| O | -0.09873 | -3.14444 | -1.17342 |
| C | 2.07018  | -0.51797 | -2.10667 |
| O | 2.31522  | -0.31290 | -3.21006 |
| O | 0.26625  | -0.71209 | 2.24760  |
| H | 0.98677  | 4.07563  | -0.87562 |
| H | -1.45734 | 4.11340  | -1.18093 |
| H | 2.91103  | 3.98463  | -0.38561 |
| H | 6.00912  | 1.56823  | 1.36862  |
| H | -2.77027 | 1.98658  | -0.82905 |
| H | 5.20567  | 3.80575  | 0.50231  |
| H | 3.94961  | -1.35539 | 1.78258  |
| H | 5.11399  | -1.35201 | 0.43777  |
| H | 5.56078  | -0.60475 | 1.97902  |
| H | -1.68642 | -1.09892 | -1.20673 |
| H | -1.29122 | -1.04604 | 0.52066  |
| H | -3.22857 | -0.00759 | -2.82046 |
| H | -3.54121 | -1.72832 | -2.47824 |
| H | -4.88392 | -0.65239 | -2.92950 |
| H | -7.18387 | 0.97083  | -0.54649 |
| H | -6.82146 | -0.25654 | -1.78479 |
| H | -7.37605 | -0.75717 | -0.16935 |
| H | -1.81524 | 0.02240  | 2.28720  |
| H | -2.94176 | 1.34014  | 2.71590  |
| H | -3.27490 | -0.32548 | 3.25393  |
| H | -6.44017 | 1.44687  | 1.83093  |
| H | -6.64636 | -0.28755 | 2.23327  |
| H | -5.37709 | 0.67651  | 3.04203  |
| H | 1.46639  | -2.29276 | 3.13705  |

### 3<sub>C2</sub>(I6-R)

|                  |   |                               |
|------------------|---|-------------------------------|
| Energy           | = | -3017.432212                  |
| Enthalpy 0K      | = | -3016.857550                  |
| Enthalpy 298K    | = | -3016.811034                  |
| Free Energy 298K | = | -3016.937344                  |
| Nimag            | = | 0 (20.7222 cm <sup>-1</sup> ) |

|   |          |          |          |
|---|----------|----------|----------|
| N | 3.13149  | -0.97264 | 0.50934  |
| C | 2.62736  | -0.59841 | 1.74292  |
| C | 3.47894  | -0.58394 | 2.88780  |
| C | 4.76761  | -1.03767 | 2.78487  |
| C | 5.22438  | -1.53041 | 1.54462  |
| C | 4.38279  | -1.46921 | 0.43588  |
| C | 1.23897  | -0.30199 | 1.81097  |
| N | 0.51830  | -0.38422 | 0.62848  |
| C | -0.82571 | -0.34044 | 0.69466  |
| C | -1.52574 | -0.10591 | 1.86693  |
| C | -0.79736 | 0.09196  | 3.06306  |
| C | 0.56450  | -0.01849 | 3.03710  |
| C | -1.60418 | -0.57291 | -0.58658 |
| N | -2.88501 | -1.22179 | -0.35722 |
| C | -3.01850 | -2.53578 | 0.07459  |
| C | -4.35828 | -2.77069 | 0.18590  |
| N | -5.00255 | -1.59441 | -0.18287 |

|    |          |          |          |
|----|----------|----------|----------|
| C  | -4.09559 | -0.66992 | -0.52009 |
| C  | -1.84668 | -3.41888 | 0.31518  |
| C  | -4.34953 | 0.71218  | -0.99204 |
| C  | -6.44913 | -1.44953 | -0.21900 |
| C  | -5.10407 | -3.98859 | 0.59996  |
| Mn | 1.81262  | -0.40772 | -1.04595 |
| C  | 3.00856  | -0.27831 | -2.37951 |
| O  | 3.68279  | -0.12055 | -3.29940 |
| C  | 4.91061  | -1.97126 | -0.87893 |
| C  | 1.43161  | -2.15994 | -1.40813 |
| O  | 1.21883  | -3.25846 | -1.66804 |
| C  | 0.69395  | 0.24667  | -2.26281 |
| O  | 0.05278  | 0.69864  | -3.11636 |
| C  | 2.38457  | 1.49628  | -0.53810 |
| O  | 3.50282  | 1.95597  | -0.48291 |
| O  | 1.36841  | 2.43255  | -0.23067 |
| O  | -1.07668 | 2.81895  | -1.34593 |
| O  | -0.31641 | 3.09416  | 2.03413  |
| O  | -1.24518 | 5.59598  | -1.31502 |
| O  | -2.84180 | 2.95959  | 0.83105  |
| O  | -1.72735 | 5.40089  | 1.39983  |
| H  | -1.78737 | 0.38309  | -1.09113 |
| H  | -1.03057 | -1.21166 | -1.26626 |
| H  | 3.10196  | -0.22195 | 3.84388  |
| H  | -2.61420 | -0.06605 | 1.85993  |
| H  | 1.13695  | 0.10097  | 3.95642  |
| H  | -1.31904 | 0.31694  | 3.99578  |
| H  | 6.22832  | -1.94274 | 1.43568  |
| H  | 5.42663  | -1.03396 | 3.65668  |
| H  | -6.85524 | -1.93986 | -1.11406 |
| H  | -6.72128 | -0.39003 | -0.22476 |
| H  | -6.87765 | -1.91250 | 0.67735  |
| H  | 5.76888  | -2.63551 | -0.71066 |
| H  | 4.14884  | -2.52672 | -1.44185 |
| H  | 5.26021  | -1.13938 | -1.50722 |
| H  | -0.19166 | 2.60356  | -0.97294 |
| H  | -2.33604 | 2.85106  | 0.00530  |
| H  | -2.69594 | 3.90630  | 1.04628  |
| H  | -1.15990 | 4.62983  | -1.43583 |
| H  | -2.09039 | 5.80757  | -1.73041 |
| H  | 0.30488  | 2.63322  | 1.45070  |
| H  | -1.18075 | 2.71284  | 1.79084  |
| H  | -1.02279 | 4.77774  | 1.66384  |
| H  | -1.51425 | 5.60559  | 0.46627  |
| H  | -1.09358 | 2.40339  | -2.21813 |
| H  | -3.78641 | 0.90200  | -1.91696 |
| H  | -5.41252 | 0.86416  | -1.20538 |
| H  | -4.02963 | 1.44637  | -0.23622 |
| H  | -1.20548 | -3.02799 | 1.11965  |
| H  | -2.18624 | -4.42137 | 0.60295  |
| H  | -1.22984 | -3.51334 | -0.59081 |
| H  | -4.40218 | -4.80714 | 0.80100  |
| H  | -5.68832 | -3.80717 | 1.51541  |
| H  | -5.80028 | -4.31716 | -0.18647 |
| H  | 1.82378  | 3.28356  | -0.08312 |

**3C2(TS3)**

Energy = -3017.410701  
 Enthalpy 0K = -3016.841109  
 Enthalpy 298K = -3016.794791  
 Free Energy 298K = -3016.921206  
 Nimag = 1 (-210.3288 cm<sup>-1</sup>)

N 3.25437 -0.81315 0.46540  
 C 2.72802 -0.56408 1.72390  
 C 3.57367 -0.60987 2.87166  
 C 4.87963 -0.99849 2.74264  
 C 5.36480 -1.36333 1.46665  
 C 4.53214 -1.24643 0.36040  
 C 1.32843 -0.32795 1.80524  
 N 0.61088 -0.38197 0.62140  
 C -0.73568 -0.38835 0.68696  
 C -1.43760 -0.23141 1.86922  
 C -0.71656 -0.05429 3.07103  
 C 0.64828 -0.11911 3.04170  
 C -1.51961 -0.59123 -0.59610  
 N -2.73755 -1.36017 -0.38380  
 C -2.74522 -2.70377 -0.02567  
 C -4.05452 -3.05576 0.12648  
 N -4.80772 -1.91973 -0.14710  
 C -3.99628 -0.90419 -0.46536  
 C -1.49915 -3.50606 0.09617  
 C -4.39400 0.47649 -0.82701  
 C -6.26027 -1.89619 -0.09660  
 C -4.68379 -4.35089 0.49650  
 Mn 1.90688 -0.20657 -1.03521  
 C 3.07136 0.02148 -2.39671  
 O 3.70601 0.22013 -3.33352  
 C 5.09082 -1.60356 -0.98769  
 C 1.63685 -1.96566 -1.49059  
 O 1.52269 -3.06898 -1.76754  
 C 0.70676 0.44999 -2.22545  
 O 0.04009 0.84778 -3.07090  
 C 2.40456 1.60360 -0.39762  
 O 3.12691 2.40415 -0.02024  
 O 0.57894 2.80881 -0.64335  
 O -1.74974 2.69934 -1.36773  
 O -0.25673 3.11140 1.84816  
 O -2.24969 5.34548 -1.14555  
 O -3.02821 2.63207 1.09141  
 O -2.06162 5.16632 1.61660  
 H -1.78642 0.38814 -1.01558  
 H -0.91865 -1.13504 -1.33192  
 H 3.17525 -0.35007 3.85178  
 H -2.52618 -0.21801 1.86242  
 H 1.21848 -0.01695 3.96427  
 H -1.24491 0.11494 4.01180  
 H 6.38671 -1.72031 1.33355  
 H 5.53318 -1.04242 3.61714  
 H -6.67401 -2.47519 -0.93297  
 H -6.62168 -0.86556 -0.15152  
 H -6.59404 -2.33409 0.85190  
 H 5.99896 -2.20914 -0.86933

H 4.37528 -2.17561 -1.59346  
 H 5.37307 -0.70092 -1.54889  
 H -0.69647 2.71605 -1.09251  
 H -2.64018 2.59254 0.19471  
 H -2.90768 3.57217 1.33876  
 H -2.07234 4.38847 -1.30983  
 H -3.20282 5.42416 -1.27255  
 H 0.13637 2.99916 0.93718  
 H -1.05429 2.56047 1.79445  
 H -1.28090 4.58275 1.74385  
 H -2.05618 5.35300 0.65544  
 H -1.79733 2.35166 -2.26462  
 H -3.80612 0.82687 -1.68550  
 H -5.45326 0.51777 -1.10166  
 H -4.21017 1.16786 0.01041  
 H -0.81309 -3.08247 0.84481  
 H -1.74345 -4.53237 0.39641  
 H -0.96622 -3.55005 -0.86516  
 H -3.91068 -5.11396 0.64853  
 H -5.26320 -4.26005 1.42816  
 H -5.36575 -4.70340 -0.29216  
 H 0.93163 3.66135 -0.92635

**3C2(I7-R)**

Energy = -3017.418810  
 Enthalpy 0K = -3016.846922  
 Enthalpy 298K = -3016.800106  
 Free Energy 298K = -3016.927828  
 Nimag = 0 (20.8591 cm<sup>-1</sup>)

N 3.44970 -0.48616 0.42562  
 C 2.90598 -0.33124 1.69347  
 C 3.74555 -0.41436 2.84253  
 C 5.06728 -0.74025 2.69888  
 C 5.57673 -0.99900 1.40593  
 C 4.74743 -0.85003 0.30166  
 C 1.49721 -0.15467 1.77232  
 N 0.79303 -0.25260 0.58416  
 C -0.55209 -0.32685 0.63513  
 C -1.27207 -0.15516 1.80369  
 C -0.57156 0.08397 3.00626  
 C 0.79648 0.05304 2.99811  
 C -1.32005 -0.64060 -0.63246  
 N -2.36790 -1.63193 -0.39893  
 C -2.12586 -2.91676 0.08392  
 C -3.33517 -3.54717 0.13920  
 N -4.27810 -2.63609 -0.31329  
 C -3.67877 -1.48637 -0.64515  
 C -0.76928 -3.41224 0.44187  
 C -4.38380 -0.30801 -1.20116  
 C -5.69725 -2.91812 -0.44217  
 C -3.70630 -4.91982 0.57327  
 Mn 2.07723 0.16542 -1.02816  
 C 3.23467 0.59078 -2.36069  
 O 3.86602 0.90659 -3.26382  
 C 5.32971 -1.08343 -1.06321



|   |          |          |          |
|---|----------|----------|----------|
| C | 1.93996  | -1.58133 | -1.65647 |
| O | 1.90484  | -2.65394 | -2.04004 |
| C | 0.79773  | 0.83494  | -2.14173 |
| O | 0.07820  | 1.27251  | -2.91675 |
| C | 2.38881  | 1.88457  | -0.26435 |
| O | 2.73020  | 2.88274  | 0.15381  |
| O | -0.21712 | 2.94401  | -0.12357 |
| O | -2.41976 | 2.30512  | -1.24030 |
| O | -1.61111 | 3.13372  | 2.23045  |
| O | -3.40152 | 4.71394  | -1.21009 |
| O | -3.83441 | 1.89156  | 1.02214  |
| O | -3.82461 | 4.63931  | 1.48659  |
| H | -1.78354 | 0.28965  | -0.99820 |
| H | -0.65849 | -1.04507 | -1.40582 |
| H | 3.32780  | -0.24366 | 3.83427  |
| H | -2.36145 | -0.16332 | 1.77269  |
| H | 1.35273  | 0.20076  | 3.92339  |
| H | -1.11590 | 0.27391  | 3.93346  |
| H | 6.61501  | -1.29873 | 1.25951  |
| H | 5.71627  | -0.81771 | 3.57435  |
| H | -5.87654 | -3.56293 | -1.31342 |
| H | -6.24941 | -1.98074 | -0.56290 |
| H | -6.05140 | -3.42232 | 0.46496  |
| H | 6.26349  | -1.65480 | -0.98066 |
| H | 4.64683  | -1.64086 | -1.71810 |
| H | 5.57573  | -0.13024 | -1.55375 |
| H | -1.07073 | 2.66207  | -0.61131 |
| H | -3.36523 | 1.95178  | 0.15509  |
| H | -4.09009 | 2.82061  | 1.18847  |
| H | -3.00638 | 3.78562  | -1.26192 |
| H | -4.28560 | 4.60144  | -1.57769 |
| H | -0.99832 | 3.10287  | 1.46234  |
| H | -2.26778 | 2.45640  | 1.97899  |
| H | -2.95725 | 4.32301  | 1.81191  |
| H | -3.66488 | 4.78045  | 0.52626  |
| H | -2.28574 | 2.06106  | -2.16176 |
| H | -3.69595 | 0.52154  | -1.40410 |
| H | -4.90317 | -0.58992 | -2.12895 |
| H | -5.12473 | 0.06051  | -0.47804 |
| H | -0.39457 | -2.94285 | 1.36363  |
| H | -0.80136 | -4.49742 | 0.60011  |
| H | -0.04689 | -3.20740 | -0.35978 |
| H | -2.80624 | -5.49092 | 0.83184  |
| H | -4.36057 | -4.89376 | 1.45853  |
| H | -4.23944 | -5.45860 | -0.22467 |
| H | -0.00180 | 3.80555  | -0.49797 |

### **3<sub>C2</sub><sup>+</sup> (I8)**

|                  |                                 |
|------------------|---------------------------------|
| Energy           | = -2559.732212                  |
| Enthalpy 0K      | = -2559.302494                  |
| Enthalpy 298K    | = -2559.269480                  |
| Free Energy 298K | = -2559.367265                  |
| Nimag            | = 0 (14.4553 cm <sup>-1</sup> ) |

|   |          |          |          |
|---|----------|----------|----------|
| C | -3.62182 | 0.25608  | 1.21354  |
| N | -3.13836 | -0.30699 | 0.09674  |
| C | -4.17805 | -0.55318 | -0.79375 |

|    |          |          |          |
|----|----------|----------|----------|
| C  | -5.32094 | -0.12779 | -0.17859 |
| N  | -4.94419 | 0.36493  | 1.06430  |
| C  | -1.73564 | -0.58589 | -0.16001 |
| C  | -0.94099 | 0.64218  | -0.55670 |
| N  | 0.40229  | 0.59152  | -0.41039 |
| C  | 1.14048  | 1.74082  | -0.66390 |
| C  | 0.50269  | 2.88135  | -1.23821 |
| C  | -0.84842 | 2.88409  | -1.43848 |
| C  | -1.60502 | 1.75004  | -1.04947 |
| Mn | 1.69388  | -1.04215 | -0.08913 |
| C  | 1.23511  | -1.01015 | 1.72874  |
| C  | 2.50484  | 1.73543  | -0.26407 |
| N  | 2.99472  | 0.56859  | 0.29689  |
| C  | 4.21995  | 0.57582  | 0.87502  |
| C  | 5.03749  | 1.69868  | 0.84514  |
| C  | 4.59716  | 2.86307  | 0.18275  |
| C  | 3.34056  | 2.88580  | -0.36031 |
| C  | 4.73711  | -0.65465 | 1.56326  |
| C  | -3.95737 | -1.15880 | -2.13364 |
| C  | -5.87144 | 0.92202  | 2.03421  |
| C  | -6.73832 | -0.12994 | -0.62618 |
| C  | -2.83844 | 0.71261  | 2.38676  |
| C  | 2.88551  | -2.40645 | 0.11817  |
| O  | 3.53262  | -3.34734 | 0.19344  |
| C  | 0.54545  | -2.38904 | -0.50254 |
| O  | -0.07926 | -3.31324 | -0.76391 |
| C  | 2.17931  | -0.86513 | -1.90305 |
| O  | 2.47083  | -0.76732 | -2.99601 |
| O  | 0.97350  | -0.94334 | 2.83286  |
| H  | 1.09392  | 3.75498  | -1.51009 |
| H  | -1.34409 | 3.75250  | -1.87711 |
| H  | 2.97135  | 3.78904  | -0.84386 |
| H  | 6.01531  | 1.66129  | 1.32621  |
| H  | -2.68971 | 1.74728  | -1.15033 |
| H  | 5.24181  | 3.74291  | 0.12258  |
| H  | 3.96908  | -1.14446 | 2.17708  |
| H  | 5.11793  | -1.38376 | 0.83336  |
| H  | 5.57548  | -0.38930 | 2.22015  |
| H  | -1.70299 | -1.33002 | -0.96417 |
| H  | -1.31034 | -1.05459 | 0.73541  |
| H  | -3.24314 | -0.56454 | -2.72385 |
| H  | -3.56510 | -2.18428 | -2.05196 |
| H  | -4.90472 | -1.20115 | -2.68469 |
| H  | -7.15709 | 0.88784  | -0.61864 |
| H  | -6.81194 | -0.52414 | -1.64699 |
| H  | -7.36161 | -0.75607 | 0.03058  |
| H  | -1.77254 | 0.49807  | 2.25639  |
| H  | -2.95844 | 1.79757  | 2.52081  |
| H  | -3.18642 | 0.20998  | 3.30068  |
| H  | -6.33516 | 1.82864  | 1.62408  |
| H  | -6.65046 | 0.18355  | 2.26191  |
| H  | -5.33601 | 1.17430  | 2.95479  |

### **3<sub>C2</sub><sup>+</sup> (I5-P)**

|             |                |
|-------------|----------------|
| Energy      | = -3017.338237 |
| Enthalpy 0K | = -3016.759928 |

Enthalpy 298K = -3016.713819  
 Free Energy 298K = -3016.838593  
 Nimag = 0 (19.9425 cm<sup>-1</sup>)

|    |          |          |          |
|----|----------|----------|----------|
| N  | 3.06724  | -1.03824 | 0.57492  |
| C  | 2.60060  | -0.59995 | 1.76451  |
| C  | 3.41384  | -0.50175 | 2.88955  |
| C  | 4.73689  | -0.91671 | 2.80057  |
| C  | 5.18351  | -1.45017 | 1.60454  |
| C  | 4.32744  | -1.50309 | 0.49709  |
| C  | 1.14907  | -0.30125 | 1.82589  |
| N  | 0.47054  | -0.38404 | 0.66149  |
| C  | -0.87078 | -0.29416 | 0.69265  |
| C  | -1.56673 | -0.02910 | 1.87062  |
| C  | -0.86528 | 0.12195  | 3.05534  |
| C  | 0.51057  | -0.04122 | 3.03703  |
| C  | -1.65128 | -0.52219 | -0.58562 |
| N  | -2.95257 | -1.11814 | -0.34030 |
| C  | -3.13416 | -2.42547 | 0.09854  |
| C  | -4.48071 | -2.60364 | 0.22287  |
| N  | -5.08094 | -1.40522 | -0.15027 |
| C  | -4.14295 | -0.51595 | -0.49267 |
| C  | -1.99838 | -3.35923 | 0.32015  |
| C  | -4.33168 | 0.88154  | -0.94888 |
| C  | -6.52232 | -1.21177 | -0.14327 |
| C  | -5.27562 | -3.78457 | 0.65032  |
| Mn | 1.76402  | -0.52931 | -1.03112 |
| C  | 2.95447  | -0.52219 | -2.38260 |
| O  | 3.62482  | -0.44362 | -3.31188 |
| C  | 4.84753  | -2.09715 | -0.77595 |
| C  | 1.32347  | -2.29242 | -1.32231 |
| O  | 1.09567  | -3.39192 | -1.55145 |
| C  | 0.67076  | 0.11966  | -2.28559 |
| O  | 0.05581  | 0.56336  | -3.15618 |
| C  | 2.43957  | 1.36670  | -0.64796 |
| O  | 3.58673  | 1.73038  | -0.53297 |
| O  | 1.48679  | 2.39922  | -0.51664 |
| O  | -0.99908 | 2.89205  | -1.51768 |
| O  | 0.00111  | 3.00868  | 1.91830  |
| O  | -0.94089 | 5.67420  | -1.27608 |
| O  | -2.55587 | 3.00773  | 0.80875  |
| O  | -1.39069 | 5.39780  | 1.43238  |
| H  | -1.79421 | 0.43249  | -1.10768 |
| H  | -1.10103 | -1.19527 | -1.25030 |
| H  | 3.02788  | -0.11266 | 3.82934  |
| H  | -2.65242 | 0.05733  | 1.85364  |
| H  | 1.07648  | 0.02703  | 3.96355  |
| H  | -1.38616 | 0.34459  | 3.98768  |
| H  | 6.20122  | -1.82993 | 1.50514  |
| H  | 5.39923  | -0.84500 | 3.66508  |
| H  | -6.99184 | -1.93875 | -0.81799 |
| H  | -6.76863 | -0.20047 | -0.47763 |
| H  | -6.90416 | -1.35654 | 0.87533  |
| H  | 5.68300  | -2.77377 | -0.55432 |
| H  | 4.07421  | -2.66309 | -1.30950 |
| H  | 5.23250  | -1.31170 | -1.44206 |
| H  | -0.09831 | 2.62116  | -1.23706 |

|   |          |          |          |
|---|----------|----------|----------|
| H | -2.14127 | 2.93630  | -0.07038 |
| H | -2.39528 | 3.94682  | 1.05025  |
| H | -0.95644 | 4.71996  | -1.48273 |
| H | -1.74741 | 6.01506  | -1.68236 |
| H | 0.55928  | 2.67189  | 1.20169  |
| H | -0.89724 | 2.72757  | 1.65650  |
| H | -0.68643 | 4.76877  | 1.67812  |
| H | -1.18188 | 5.62385  | 0.50199  |
| H | -1.11963 | 2.52821  | -2.40441 |
| H | -3.81657 | 1.03578  | -1.90817 |
| H | -5.39227 | 1.11239  | -1.08997 |
| H | -3.91199 | 1.58503  | -0.21309 |
| H | -1.28174 | -2.96349 | 1.05571  |
| H | -2.37303 | -4.32033 | 0.69259  |
| H | -1.45359 | -3.54522 | -0.61745 |
| H | -4.60610 | -4.61588 | 0.90263  |
| H | -5.88628 | -3.55246 | 1.53616  |
| H | -5.95379 | -4.11921 | -0.14934 |
| H | 1.99119  | 3.23143  | -0.42514 |

**3<sub>C2</sub><sup>+</sup>(TS4)**

Energy = -3017.312243  
 Enthalpy 0K = -3016.739171  
 Enthalpy 298K = -3016.693605  
 Free Energy 298K = -3016.815999  
 Nimag = 1 (-284.1803 cm<sup>-1</sup>)

|    |          |          |          |
|----|----------|----------|----------|
| N  | 3.19804  | -0.88817 | 0.51579  |
| C  | 2.70091  | -0.61083 | 1.74322  |
| C  | 3.49625  | -0.64023 | 2.88512  |
| C  | 4.82898  | -1.01255 | 2.76967  |
| C  | 5.31001  | -1.37378 | 1.52361  |
| C  | 4.47612  | -1.30328 | 0.40179  |
| C  | 1.24265  | -0.34718 | 1.82203  |
| N  | 0.56011  | -0.37353 | 0.65705  |
| C  | -0.78323 | -0.32147 | 0.69895  |
| C  | -1.47686 | -0.15185 | 1.89589  |
| C  | -0.77342 | -0.04964 | 3.08348  |
| C  | 0.60596  | -0.17235 | 3.04848  |
| C  | -1.58282 | -0.48506 | -0.57754 |
| N  | -2.82388 | -1.21043 | -0.35461 |
| C  | -2.87764 | -2.56117 | -0.02245 |
| C  | -4.19738 | -2.86656 | 0.13544  |
| N  | -4.91096 | -1.69872 | -0.11140 |
| C  | -4.06763 | -0.70664 | -0.41537 |
| C  | -1.66209 | -3.41285 | 0.06554  |
| C  | -4.40939 | 0.69764  | -0.74004 |
| C  | -6.36203 | -1.63035 | -0.04574 |
| C  | -4.87166 | -4.14353 | 0.48835  |
| Mn | 1.86548  | -0.30110 | -1.03313 |
| C  | 3.02352  | -0.20421 | -2.42807 |
| O  | 3.64503  | -0.09413 | -3.38379 |
| C  | 5.04138  | -1.69764 | -0.92734 |
| C  | 1.51461  | -2.08158 | -1.42159 |
| O  | 1.36402  | -3.18429 | -1.66795 |
| C  | 0.68271  | 0.35437  | -2.26712 |
| O  | 0.03717  | 0.72188  | -3.13609 |

|   |          |          |          |
|---|----------|----------|----------|
| C | 2.45531  | 1.50191  | -0.52327 |
| O | 3.17942  | 2.31309  | -0.18399 |
| O | 0.64137  | 2.78179  | -0.94160 |
| O | -1.72655 | 2.76274  | -1.42547 |
| O | 0.13479  | 2.87185  | 1.65091  |
| O | -1.93253 | 5.42296  | -0.99245 |
| O | -2.68619 | 2.66718  | 1.13892  |
| O | -1.52300 | 5.09853  | 1.72285  |
| H | -1.81160 | 0.51021  | -0.98806 |
| H | -1.01019 | -1.04652 | -1.32143 |
| H | 3.08762  | -0.38563 | 3.86036  |
| H | -2.56357 | -0.08834 | 1.88777  |
| H | 1.17531  | -0.14085 | 3.97443  |
| H | -1.29407 | 0.10342  | 4.02990  |
| H | 6.33926  | -1.71080 | 1.39559  |
| H | 5.47418  | -1.03944 | 3.64943  |
| H | -6.79891 | -2.22350 | -0.85969 |
| H | -6.69492 | -0.59267 | -0.13238 |
| H | -6.69778 | -2.02906 | 0.91931  |
| H | 5.94253  | -2.30608 | -0.78030 |
| H | 4.32753  | -2.28150 | -1.52143 |
| H | 5.34007  | -0.80827 | -1.50100 |
| H | -0.62178 | 2.74379  | -1.26386 |
| H | -2.43652 | 2.67520  | 0.19122  |
| H | -2.50435 | 3.58654  | 1.42540  |
| H | -1.87999 | 4.46804  | -1.23740 |
| H | -2.87529 | 5.62098  | -1.04458 |
| H | 0.39140  | 2.87039  | 0.68743  |
| H | -0.75486 | 2.48091  | 1.62147  |
| H | -0.76616 | 4.47764  | 1.76553  |
| H | -1.58018 | 5.32873  | 0.77179  |
| H | -1.90218 | 2.48463  | -2.33043 |
| H | -3.86947 | 1.01954  | -1.64055 |
| H | -5.48198 | 0.80936  | -0.92730 |
| H | -4.11598 | 1.36419  | 0.08592  |
| H | -0.93726 | -3.02138 | 0.79515  |
| H | -1.93970 | -4.42836 | 0.37296  |
| H | -1.16137 | -3.47909 | -0.91167 |
| H | -4.12638 | -4.93551 | 0.63061  |
| H | -5.44824 | -4.04294 | 1.42059  |
| H | -5.56504 | -4.46069 | -0.30523 |
| H | 1.00578  | 3.62075  | -1.24795 |

### $3\text{C}_2^+(16\text{-P})$

|                  |   |                               |
|------------------|---|-------------------------------|
| Energy           | = | -3017.319276                  |
| Enthalpy 0K      | = | -3016.742582                  |
| Enthalpy 298K    | = | -3016.696738                  |
| Free Energy 298K | = | -3016.818877                  |
| Nimag            | = | 0 (27.6502 $\text{cm}^{-1}$ ) |

|   |         |          |         |
|---|---------|----------|---------|
| N | 3.20564 | -0.94199 | 0.46468 |
| C | 2.66718 | -0.93410 | 1.70565 |
| C | 3.40399 | -1.29078 | 2.83184 |
| C | 4.72722 | -1.67986 | 2.67825 |
| C | 5.26157 | -1.72116 | 1.40245 |
| C | 4.48290 | -1.34814 | 0.30194 |

|    |          |          |          |
|----|----------|----------|----------|
| C  | 1.22559  | -0.59967 | 1.80774  |
| N  | 0.55255  | -0.46815 | 0.64382  |
| C  | -0.78840 | -0.36945 | 0.68350  |
| C  | -1.48075 | -0.28798 | 1.89124  |
| C  | -0.78152 | -0.31673 | 3.08431  |
| C  | 0.59171  | -0.50100 | 3.04314  |
| C  | -1.59398 | -0.37712 | -0.59974 |
| N  | -2.82335 | -1.14561 | -0.44664 |
| C  | -2.83559 | -2.53234 | -0.30933 |
| C  | -4.13946 | -2.89578 | -0.14045 |
| N  | -4.88483 | -1.72548 | -0.18107 |
| C  | -4.07971 | -0.67555 | -0.37556 |
| C  | -1.60101 | -3.35629 | -0.39747 |
| C  | -4.52946 | 0.73208  | -0.46901 |
| C  | -6.33026 | -1.67599 | -0.03916 |
| C  | -4.77046 | -4.22881 | 0.04488  |
| Mn | 1.88934  | -0.13187 | -0.98845 |
| C  | 3.04654  | 0.17966  | -2.36111 |
| O  | 3.65197  | 0.43196  | -3.29779 |
| C  | 5.10479  | -1.40269 | -1.05818 |
| C  | 1.58738  | -1.87404 | -1.60656 |
| O  | 1.46635  | -2.94169 | -1.97671 |
| C  | 0.69306  | 0.61754  | -2.16630 |
| O  | 0.05423  | 1.03651  | -3.01328 |
| C  | 2.44500  | 1.53536  | -0.23800 |
| O  | 2.98213  | 2.42771  | 0.20672  |
| O  | 0.45232  | 3.32748  | -1.06524 |
| O  | -2.05322 | 2.74410  | -1.17173 |
| O  | 0.16661  | 2.65437  | 1.57977  |
| O  | -1.58706 | 5.25829  | -0.67002 |
| O  | -2.63067 | 2.51714  | 1.41399  |
| O  | -1.41434 | 4.95214  | 2.03894  |
| H  | -1.83084 | 0.66449  | -0.89223 |
| H  | -1.02699 | -0.85058 | -1.40661 |
| H  | 2.95368  | -1.28591 | 3.82177  |
| H  | -2.56243 | -0.16987 | 1.88660  |
| H  | 1.15835  | -0.56651 | 3.96919  |
| H  | -1.30039 | -0.21732 | 4.03883  |
| H  | 6.28962  | -2.04394 | 1.23559  |
| H  | 5.32508  | -1.96280 | 3.54627  |
| H  | -6.80931 | -2.11110 | -0.92644 |
| H  | -6.65408 | -0.63748 | 0.07901  |
| H  | -6.62604 | -2.24309 | 0.85203  |
| H  | 6.04928  | -1.95835 | -1.01379 |
| H  | 4.45250  | -1.89936 | -1.78807 |
| H  | 5.33692  | -0.38926 | -1.41641 |
| H  | -0.49108 | 2.99571  | -1.21103 |
| H  | -2.53470 | 2.58251  | 0.43051  |
| H  | -2.45268 | 3.42721  | 1.71975  |
| H  | -1.90525 | 4.33158  | -0.91024 |
| H  | -2.19932 | 5.87098  | -1.09124 |
| H  | 0.32599  | 2.90227  | 0.64163  |
| H  | -0.76195 | 2.34812  | 1.56477  |
| H  | -0.67404 | 4.31679  | 2.03809  |
| H  | -1.47918 | 5.19908  | 1.09084  |
| H  | -2.41902 | 2.61495  | -2.05293 |
| H  | -3.72240 | 1.39054  | -0.81257 |

|   |          |          |          |
|---|----------|----------|----------|
| H | -5.37411 | 0.80819  | -1.16795 |
| H | -4.85431 | 1.09358  | 0.51753  |
| H | -0.84813 | -3.05038 | 0.34452  |
| H | -1.84349 | -4.41113 | -0.22006 |
| H | -1.14949 | -3.27542 | -1.39746 |
| H | -4.00553 | -5.01455 | 0.02420  |
| H | -5.29829 | -4.28787 | 1.00908  |
| H | -5.50028 | -4.43612 | -0.75244 |
| H | 0.30375  | 4.28328  | -1.04664 |

### 3C2+(I7-P)

|                  |   |                               |
|------------------|---|-------------------------------|
| Energy           | = | -2559.624776                  |
| Enthalpy 0K      | = | -2559.191193                  |
| Enthalpy 298K    | = | -2559.158715                  |
| Free Energy 298K | = | -2559.254035                  |
| Nimag            | = | 0 (15.2090 cm <sup>-1</sup> ) |

|    |          |          |          |
|----|----------|----------|----------|
| C  | -3.64054 | 0.21123  | 1.21212  |
| N  | -3.14535 | -0.29575 | 0.07101  |
| C  | -4.17892 | -0.50925 | -0.83747 |
| C  | -5.32682 | -0.11589 | -0.21156 |
| N  | -4.96084 | 0.32198  | 1.05528  |
| C  | -1.74442 | -0.57864 | -0.18221 |
| C  | -0.94233 | 0.65174  | -0.55241 |
| N  | 0.39210  | 0.64066  | -0.36848 |
| C  | 1.08724  | 1.77723  | -0.59415 |
| C  | 0.48471  | 2.91693  | -1.12484 |
| C  | -0.87701 | 2.90476  | -1.38018 |
| C  | -1.60337 | 1.76882  | -1.05929 |
| Mn | 1.69800  | -1.02900 | -0.06831 |
| C  | 1.33685  | -0.98179 | 1.78495  |
| C  | 2.51614  | 1.77493  | -0.19549 |
| N  | 3.03523  | 0.59649  | 0.22018  |
| C  | 4.30136  | 0.56703  | 0.68928  |
| C  | 5.08537  | 1.72634  | 0.71102  |
| C  | 4.56925  | 2.92596  | 0.25617  |
| C  | 3.25711  | 2.95301  | -0.19514 |
| C  | 4.91174  | -0.70203 | 1.19610  |
| C  | -3.94660 | -1.06629 | -2.19634 |
| C  | -5.89791 | 0.83980  | 2.03830  |
| C  | -6.74167 | -0.10726 | -0.66654 |
| C  | -2.87390 | 0.60752  | 2.41806  |
| C  | 2.86726  | -2.42882 | 0.12011  |
| O  | 3.47408  | -3.39269 | 0.19461  |
| C  | 0.51822  | -2.38997 | -0.38190 |
| O  | -0.10779 | -3.32561 | -0.57700 |
| C  | 2.10129  | -0.93640 | -1.91040 |
| O  | 2.35017  | -0.88926 | -3.01551 |
| O  | 1.13996  | -0.93688 | 2.90089  |
| H  | 1.06757  | 3.80948  | -1.34135 |
| H  | -1.36990 | 3.77979  | -1.80611 |
| H  | 2.81795  | 3.89146  | -0.52468 |
| H  | 6.10389  | 1.66517  | 1.09528  |
| H  | -2.68256 | 1.74598  | -1.20743 |
| H  | 5.17110  | 3.83608  | 0.26564  |
| H  | 4.25154  | -1.22296 | 1.90186  |

|   |          |          |          |
|---|----------|----------|----------|
| H | 5.15404  | -1.37529 | 0.36161  |
| H | 5.85092  | -0.47937 | 1.71667  |
| H | -1.70518 | -1.30645 | -1.00192 |
| H | -1.32870 | -1.05783 | 0.71001  |
| H | -3.21833 | -0.46020 | -2.75650 |
| H | -3.56717 | -2.09871 | -2.14600 |
| H | -4.88689 | -1.07826 | -2.76057 |
| H | -7.16923 | 0.90503  | -0.60721 |
| H | -6.80750 | -0.44833 | -1.70667 |
| H | -7.36132 | -0.77227 | -0.04559 |
| H | -1.80763 | 0.38448  | 2.30282  |
| H | -2.98455 | 1.68703  | 2.59714  |
| H | -3.24754 | 0.07010  | 3.30143  |
| H | -6.32856 | 1.78274  | 1.67678  |
| H | -6.69975 | 0.10826  | 2.19766  |
| H | -5.37986 | 1.01701  | 2.98584  |

### 3C5(I6-R)

|                  |   |                               |
|------------------|---|-------------------------------|
| Energy           | = | -3017.432181                  |
| Enthalpy 0K      | = | -3016.857147                  |
| Enthalpy 298K    | = | -3016.810742                  |
| Free Energy 298K | = | -3016.936938                  |
| Nimag            | = | 0 (18.8312 cm <sup>-1</sup> ) |

|    |          |          |          |
|----|----------|----------|----------|
| C  | -3.05775 | -2.45706 | 0.04995  |
| N  | -2.90580 | -1.19813 | -0.38514 |
| C  | -4.15276 | -0.61302 | -0.57195 |
| C  | -5.07735 | -1.55915 | -0.22833 |
| N  | -4.36826 | -2.68914 | 0.15746  |
| C  | -1.61496 | -0.55999 | -0.60454 |
| C  | -0.83722 | -0.34890 | 0.68024  |
| N  | 0.50598  | -0.40653 | 0.61810  |
| C  | 1.22329  | -0.34340 | 1.80414  |
| C  | 0.54786  | -0.05867 | 3.02954  |
| C  | -0.81271 | 0.06800  | 3.05165  |
| C  | -1.53969 | -0.11566 | 1.85197  |
| C  | 2.60778  | -0.65770 | 1.73739  |
| C  | 3.45474  | -0.67359 | 2.88544  |
| C  | 4.73797  | -1.14236 | 2.77936  |
| C  | 5.19329  | -1.61976 | 1.53287  |
| C  | 4.35665  | -1.52942 | 0.42221  |
| N  | 3.11164  | -1.01841 | 0.49988  |
| Mn | 1.80638  | -0.41254 | -1.05123 |
| C  | 1.41159  | -2.15240 | -1.45568 |
| O  | 1.18676  | -3.24146 | -1.74430 |
| C  | 4.88310  | -2.01459 | -0.89951 |
| C  | -4.33052 | 0.78186  | -1.05488 |
| C  | -6.56353 | -1.52206 | -0.22134 |
| C  | -4.98375 | -3.92895 | 0.59914  |
| C  | -1.97037 | -3.40828 | 0.38328  |
| C  | 0.69847  | 0.27366  | -2.26024 |
| O  | 0.06275  | 0.74580  | -3.10685 |
| C  | 2.38670  | 1.47740  | -0.50251 |
| O  | 1.37280  | 2.41031  | -0.18228 |
| C  | 3.01373  | -0.26565 | -2.37292 |
| O  | 3.69790  | -0.09488 | -3.28294 |

|   |          |          |          |    |          |          |          |
|---|----------|----------|----------|----|----------|----------|----------|
| O | 3.50706  | 1.92997  | -0.43059 | C  | 0.70634  | -0.07335 | 3.02663  |
| O | -1.05402 | 2.85235  | -1.32071 | C  | -0.65792 | 0.00895  | 3.06372  |
| O | -1.06764 | 5.63471  | -1.28566 | C  | -1.39043 | -0.17813 | 1.86976  |
| O | -2.82203 | 3.10049  | 0.84323  | C  | 2.77259  | -0.54681 | 1.68979  |
| O | -0.31730 | 3.08848  | 2.07985  | C  | 3.62948  | -0.61904 | 2.82716  |
| O | -1.57743 | 5.47746  | 1.42769  | C  | 4.93073  | -1.01685 | 2.67635  |
| H | -1.80156 | 0.40482  | -1.09076 | C  | 5.39886  | -1.36399 | 1.38937  |
| H | -1.04377 | -1.18232 | -1.30115 | C  | 4.55500  | -1.22231 | 0.29434  |
| H | 3.07848  | -0.32405 | 3.84642  | N  | 3.28268  | -0.78001 | 0.42171  |
| H | -2.62801 | -0.06026 | 1.83979  | Mn | 1.92360  | -0.13195 | -1.05105 |
| H | 1.11860  | 0.05065  | 3.95122  | C  | 1.64719  | -1.87150 | -1.57427 |
| H | -1.33463 | 0.29588  | 3.98349  | O  | 1.50934  | -2.95935 | -1.89783 |
| H | 6.19241  | -2.04274 | 1.42052  | C  | 5.09402  | -1.56215 | -1.06631 |
| H | 5.39339  | -1.16230 | 3.65366  | C  | -4.37404 | 0.29402  | -1.13085 |
| H | -6.98439 | -2.30922 | -0.86537 | C  | -6.23742 | -2.32392 | -0.33233 |
| H | -6.91815 | -0.55128 | -0.58852 | C  | -4.32956 | -4.43058 | 0.60540  |
| H | -6.96018 | -1.66983 | 0.79500  | C  | -1.43190 | -3.44451 | 0.48205  |
| H | 5.72227  | -2.70496 | -0.74007 | C  | 0.70731  | 0.55682  | -2.20418 |
| H | 4.11167  | -2.53480 | -1.48235 | O  | 0.02366  | 0.98103  | -3.02300 |
| H | 5.25970  | -1.17720 | -1.50473 | C  | 2.40232  | 1.66416  | -0.35917 |
| H | -0.17985 | 2.60919  | -0.93966 | O  | 0.51808  | 2.82821  | -0.45030 |
| H | -2.32421 | 2.96694  | 0.01662  | C  | 3.08549  | 0.15171  | -2.40573 |
| H | -2.62733 | 4.03760  | 1.05971  | O  | 3.72337  | 0.38908  | -3.33083 |
| H | -1.04012 | 4.66573  | -1.41050 | O  | 3.11615  | 2.47366  | 0.01429  |
| H | -1.89649 | 5.89854  | -1.70414 | O  | -1.78386 | 2.71786  | -1.26295 |
| H | 0.29095  | 2.59944  | 1.50599  | O  | -2.49324 | 5.31495  | -1.10513 |
| H | -1.19725 | 2.76505  | 1.80805  | O  | -3.21085 | 2.51613  | 1.08505  |
| H | -0.91513 | 4.81372  | 1.70158  | O  | -0.52165 | 3.19800  | 1.96433  |
| H | -1.34387 | 5.66388  | 0.49524  | O  | -2.45676 | 5.12030  | 1.65934  |
| H | -1.07751 | 2.43691  | -2.19274 | H  | -1.82452 | 0.37353  | -0.98463 |
| H | -3.83465 | 0.93556  | -2.02562 | H  | -0.87811 | -1.09038 | -1.34262 |
| H | -5.39933 | 0.99226  | -1.18604 | H  | 3.24292  | -0.37605 | 3.81637  |
| H | -3.92617 | 1.51273  | -0.33855 | H  | -2.47919 | -0.14636 | 1.86447  |
| H | -1.88199 | -3.52034 | 1.47460  | H  | 1.28455  | 0.03624  | 3.94356  |
| H | -2.17512 | -4.39498 | -0.05400 | H  | -1.17708 | 0.20068  | 4.00524  |
| H | -1.00952 | -3.05320 | -0.00415 | H  | 6.41612  | -1.72738 | 1.23913  |
| H | -4.21624 | -4.59993 | 0.99747  | H  | 5.59318  | -1.08296 | 3.54270  |
| H | -5.71117 | -3.71136 | 1.39090  | H  | -6.49706 | -3.19616 | -0.95129 |
| H | -5.49345 | -4.41466 | -0.24359 | H  | -6.72530 | -1.44039 | -0.76185 |
| H | 1.83015  | 3.25572  | -0.01097 | H  | -6.65257 | -2.48853 | 0.67411  |

### 3<sub>C5</sub>(TS3)

|                  |   |                                 |
|------------------|---|---------------------------------|
| Energy           | = | -3017.410346                    |
| Enthalpy 0K      | = | -3016.840924                    |
| Enthalpy 298K    | = | -3016.794629                    |
| Free Energy 298K | = | -3016.920793                    |
| Nimag            | = | 1 (-204.4705 cm <sup>-1</sup> ) |

|   |          |          |          |   |          |          |          |
|---|----------|----------|----------|---|----------|----------|----------|
| C | -2.64135 | -2.67865 | 0.09409  | H | 5.38495  | -0.65372 | -1.61351 |
| N | -2.67425 | -1.41775 | -0.36172 | H | -0.74112 | 2.73561  | -0.94942 |
| C | -3.99040 | -1.04516 | -0.61128 | H | -2.75233 | 2.51470  | 0.22006  |
| C | -4.76525 | -2.12153 | -0.28083 | H | -3.18065 | 3.46172  | 1.33716  |
| N | -3.90158 | -3.11545 | 0.15955  | H | -2.22147 | 4.37511  | -1.24112 |
| C | -1.49117 | -0.59266 | -0.58413 | H | -3.43907 | 5.30529  | -1.29508 |
| C | -0.69736 | -0.35960 | 0.68580  | H | -0.04822 | 3.06116  | 1.09638  |
| N | 0.64777  | -0.35991 | 0.60974  | H | -1.28405 | 2.60330  | 1.87534  |
| C | 1.37571  | -0.30050 | 1.78710  | H | -1.64015 | 4.59467  | 1.81005  |
|   |          |          |          | H | -2.42355 | 5.32173  | 0.70174  |
|   |          |          |          | H | -1.80611 | 2.34687  | -2.15123 |
|   |          |          |          | H | -3.85467 | 0.52323  | -2.07349 |
|   |          |          |          | H | -5.45350 | 0.31535  | -1.32582 |
|   |          |          |          | H | -4.14161 | 1.08560  | -0.40299 |
|   |          |          |          | H | -1.36548 | -3.52485 | 1.57775  |

|   |          |          |          |
|---|----------|----------|----------|
| H | -1.46669 | -4.45760 | 0.05906  |
| H | -0.52397 | -2.95106 | 0.12059  |
| H | -3.49360 | -4.94887 | 1.08535  |
| H | -5.14148 | -4.31927 | 1.33445  |
| H | -4.68399 | -5.01996 | -0.25088 |
| H | 0.86161  | 3.68847  | -0.72127 |

### 3C<sub>5</sub>(I7-R)

|                  |   |                               |
|------------------|---|-------------------------------|
| Energy           | = | -3017.417431                  |
| Enthalpy 0K      | = | -3016.845230                  |
| Enthalpy 298K    | = | -3016.798566                  |
| Free Energy 298K | = | -3016.925628                  |
| Nimag            | = | 0 (16.7013 cm <sup>-1</sup> ) |

|    |          |          |          |
|----|----------|----------|----------|
| C  | -2.05009 | -2.87097 | 0.14484  |
| N  | -2.33232 | -1.66867 | -0.38061 |
| C  | -3.67714 | -1.62005 | -0.73287 |
| C  | -4.21358 | -2.82711 | -0.38243 |
| N  | -3.18346 | -3.57800 | 0.16633  |
| C  | -1.35561 | -0.60027 | -0.60238 |
| C  | -0.57220 | -0.27022 | 0.65153  |
| N  | 0.77315  | -0.20106 | 0.58803  |
| C  | 1.48802  | -0.10082 | 1.76942  |
| C  | 0.79878  | 0.11977  | 2.99974  |
| C  | -0.56890 | 0.15397  | 3.02032  |
| C  | -1.28110 | -0.09206 | 1.82515  |
| C  | 2.89413  | -0.29261 | 1.67868  |
| C  | 3.74432  | -0.37568 | 2.81971  |
| C  | 5.06035  | -0.71995 | 2.66512  |
| C  | 5.55271  | -0.99764 | 1.36975  |
| C  | 4.71371  | -0.84813 | 0.27272  |
| N  | 3.42255  | -0.46580 | 0.40695  |
| Mn | 2.04510  | 0.19514  | -1.03869 |
| C  | 1.87235  | -1.55376 | -1.65626 |
| O  | 1.80775  | -2.62883 | -2.02868 |
| C  | 5.27712  | -1.10339 | -1.09614 |
| C  | -4.31609 | -0.43913 | -1.37128 |
| C  | -5.59687 | -3.35797 | -0.50715 |
| C  | -3.34231 | -4.93214 | 0.66967  |
| C  | -0.72766 | -3.33759 | 0.62902  |
| C  | 0.75819  | 0.87956  | -2.13753 |
| O  | 0.02974  | 1.32396  | -2.89957 |
| C  | 2.38099  | 1.91456  | -0.28772 |
| O  | -0.22644 | 2.95766  | -0.09629 |
| C  | 3.19506  | 0.59728  | -2.38487 |
| O  | 3.82383  | 0.89819  | -3.29493 |
| O  | 2.73242  | 2.91382  | 0.11967  |
| O  | -2.45829 | 2.39459  | -1.15794 |
| O  | -3.44280 | 4.79260  | -1.19903 |
| O  | -3.87522 | 1.89207  | 0.99418  |
| O  | -1.69547 | 3.17371  | 2.22597  |
| O  | -3.94170 | 4.64601  | 1.48709  |
| H  | -1.90002 | 0.30448  | -0.91606 |
| H  | -0.69759 | -0.92044 | -1.41642 |
| H  | 3.33939  | -0.19057 | 3.81418  |
| H  | -2.37118 | -0.09748 | 1.80181  |

|   |          |          |          |
|---|----------|----------|----------|
| H | 1.36401  | 0.27223  | 3.91887  |
| H | -1.10443 | 0.35207  | 3.95090  |
| H | 6.58532  | -1.31265 | 1.21544  |
| H | 5.71752  | -0.79761 | 3.53445  |
| H | -5.61592 | -4.28610 | -1.09850 |
| H | -6.24004 | -2.62095 | -1.00317 |
| H | -6.02999 | -3.57819 | 0.48089  |
| H | 6.20437  | -1.68597 | -1.01843 |
| H | 4.57917  | -1.65857 | -1.73696 |
| H | 5.52926  | -0.15874 | -1.59987 |
| H | -1.08508 | 2.69316  | -0.59015 |
| H | -3.36426 | 2.01072  | 0.14218  |
| H | -4.18516 | 2.80156  | 1.17053  |
| H | -3.03217 | 3.86801  | -1.23120 |
| H | -4.31242 | 4.66156  | -1.59395 |
| H | -1.06598 | 3.13838  | 1.47198  |
| H | -2.34318 | 2.48999  | 1.96723  |
| H | -3.07185 | 4.33626  | 1.81130  |
| H | -3.77188 | 4.80903  | 0.53211  |
| H | -2.47964 | 2.01256  | -2.04058 |
| H | -3.78123 | -0.14059 | -2.28503 |
| H | -5.34808 | -0.68917 | -1.64824 |
| H | -4.33810 | 0.41960  | -0.68494 |
| H | -0.65395 | -3.22441 | 1.72150  |
| H | -0.57630 | -4.39398 | 0.37278  |
| H | 0.07914  | -2.75566 | 0.17318  |
| H | -2.45461 | -5.22285 | 1.23958  |
| H | -4.21416 | -4.97072 | 1.33419  |
| H | -3.48752 | -5.62947 | -0.16633 |
| H | 0.00408  | 3.81682  | -0.46688 |

### 3C<sub>5</sub><sup>+</sup>(I5-P)

|                  |   |                               |
|------------------|---|-------------------------------|
| Energy           | = | -3017.337855                  |
| Enthalpy 0K      | = | -3016.759301                  |
| Enthalpy 298K    | = | -3016.713252                  |
| Free Energy 298K | = | -3016.837668                  |
| Nimag            | = | 0 (20.8741 cm <sup>-1</sup> ) |

|   |          |          |          |
|---|----------|----------|----------|
| C | -3.12814 | -2.37372 | 0.08192  |
| N | -2.94945 | -1.11962 | -0.36343 |
| C | -4.18462 | -0.50820 | -0.55361 |
| C | -5.12767 | -1.43099 | -0.19919 |
| N | -4.44237 | -2.57325 | 0.19508  |
| C | -1.64898 | -0.51259 | -0.60126 |
| C | -0.86820 | -0.29767 | 0.67782  |
| N | 0.47192  | -0.39790 | 0.64849  |
| C | 1.14800  | -0.33487 | 1.81573  |
| C | 0.50908  | -0.07648 | 3.02682  |
| C | -0.86499 | 0.10402  | 3.04261  |
| C | -1.56526 | -0.03297 | 1.85542  |
| C | 2.59544  | -0.65261 | 1.75365  |
| C | 3.40246  | -0.60300 | 2.88620  |
| C | 4.71961  | -1.03538 | 2.79192  |
| C | 5.16654  | -1.53523 | 1.58159  |
| C | 4.31740  | -1.53848 | 0.46747  |
| N | 3.06301  | -1.05979 | 0.55332  |

|    |          |          |          |
|----|----------|----------|----------|
| Mn | 1.77129  | -0.49629 | -1.04266 |
| C  | 1.33456  | -2.24526 | -1.40983 |
| O  | 1.10398  | -3.33135 | -1.69510 |
| C  | 4.83895  | -2.09277 | -0.82282 |
| C  | -4.33010 | 0.88438  | -1.05219 |
| C  | -6.61245 | -1.36092 | -0.18965 |
| C  | -5.08651 | -3.79317 | 0.65319  |
| C  | -2.06196 | -3.34649 | 0.42236  |
| C  | 0.68240  | 0.18530  | -2.28364 |
| O  | 0.06788  | 0.64717  | -3.14507 |
| C  | 2.43720  | 1.38830  | -0.59078 |
| O  | 1.48051  | 2.41358  | -0.44014 |
| C  | 2.97671  | -0.43603 | -2.37984 |
| O  | 3.66022  | -0.32074 | -3.29541 |
| O  | 3.58214  | 1.74986  | -0.44911 |
| O  | -0.99479 | 2.92932  | -1.46372 |
| O  | -0.94773 | 5.70873  | -1.21316 |
| O  | -2.58318 | 3.02049  | 0.84231  |
| O  | -0.04292 | 3.01245  | 1.98310  |
| O  | -1.41969 | 5.41002  | 1.48963  |
| H  | -1.81198 | 0.45012  | -1.10166 |
| H  | -1.09164 | -1.15905 | -1.28596 |
| H  | 3.01565  | -0.23926 | 3.83585  |
| H  | -2.65008 | 0.06850  | 1.83256  |
| H  | 1.07371  | -0.02155 | 3.95498  |
| H  | -1.38515 | 0.32946  | 3.97466  |
| H  | 6.17925  | -1.92655 | 1.47580  |
| H  | 5.37682  | -1.00285 | 3.66272  |
| H  | -7.05117 | -2.14233 | -0.82860 |
| H  | -6.94580 | -0.38454 | -0.56172 |
| H  | -7.00962 | -1.49479 | 0.82832  |
| H  | 5.65725  | -2.79586 | -0.62038 |
| H  | 4.05961  | -2.61793 | -1.38832 |
| H  | 5.24785  | -1.28898 | -1.45206 |
| H  | -0.09852 | 2.65375  | -1.17393 |
| H  | -2.15779 | 2.95115  | -0.03168 |
| H  | -2.42517 | 3.95891  | 1.08648  |
| H  | -0.95626 | 4.75466  | -1.42150 |
| H  | -1.75608 | 6.04419  | -1.62034 |
| H  | 0.52405  | 2.66783  | 1.27748  |
| H  | -0.93949 | 2.73816  | 1.70703  |
| H  | -0.71965 | 4.77695  | 1.73660  |
| H  | -1.20262 | 5.64296  | 0.56291  |
| H  | -1.10670 | 2.56834  | -2.35274 |
| H  | -3.85319 | 1.00774  | -2.03675 |
| H  | -5.39449 | 1.12683  | -1.16081 |
| H  | -3.88318 | 1.60909  | -0.35499 |
| H  | -1.96281 | -3.43834 | 1.51477  |
| H  | -2.29990 | -4.33584 | 0.00918  |
| H  | -1.09625 | -3.03026 | 0.01401  |
| H  | -4.33368 | -4.48136 | 1.05000  |
| H  | -5.80024 | -3.54842 | 1.44942  |
| H  | -5.61683 | -4.27056 | -0.18132 |
| H  | 1.98183  | 3.24365  | -0.31754 |

**3<sub>C5</sub><sup>+</sup>(TS4)**

Energy = -3017.311513

Enthalpy 0K = -3016.738640  
 Enthalpy 298K = -3016.693094  
 Free Energy 298K = -3016.815553  
 Nimag = 1 (-310.4638 cm<sup>-1</sup>)

|    |          |          |          |
|----|----------|----------|----------|
| C  | -2.90130 | -2.47531 | 0.05311  |
| N  | -2.82980 | -1.19082 | -0.33336 |
| C  | -4.11505 | -0.68259 | -0.50238 |
| C  | -4.97428 | -1.69959 | -0.19548 |
| N  | -4.19279 | -2.79386 | 0.14968  |
| C  | -1.58342 | -0.46873 | -0.55907 |
| C  | -0.77091 | -0.31505 | 0.70857  |
| N  | 0.57142  | -0.37359 | 0.65324  |
| C  | 1.26455  | -0.36100 | 1.81221  |
| C  | 0.63955  | -0.19117 | 3.04536  |
| C  | -0.73880 | -0.05815 | 3.09374  |
| C  | -1.45379 | -0.14763 | 1.91199  |
| C  | 2.72008  | -0.63406 | 1.71679  |
| C  | 3.52679  | -0.67621 | 2.85025  |
| C  | 4.85612  | -1.05543 | 2.71840  |
| C  | 5.32230  | -1.41001 | 1.46483  |
| C  | 4.47756  | -1.32612 | 0.35199  |
| N  | 3.20291  | -0.90545 | 0.48214  |
| Mn | 1.86058  | -0.29202 | -1.04927 |
| C  | 1.48223  | -2.06243 | -1.46224 |
| O  | 1.30388  | -3.15704 | -1.72627 |
| C  | 5.02776  | -1.71106 | -0.98621 |
| C  | -4.39206 | 0.71174  | -0.93542 |
| C  | -6.45949 | -1.76019 | -0.18791 |
| C  | -4.72433 | -4.09023 | 0.53549  |
| C  | -1.76366 | -3.37918 | 0.34868  |
| C  | 0.66965  | 0.39033  | -2.26177 |
| O  | 0.01567  | 0.77255  | -3.11775 |
| C  | 2.47328  | 1.49791  | -0.52374 |
| O  | 0.66149  | 2.80679  | -0.91622 |
| C  | 3.00627  | -0.19040 | -2.45497 |
| O  | 3.61946  | -0.07624 | -3.41542 |
| O  | 3.20370  | 2.30185  | -0.18204 |
| O  | -1.70864 | 2.80368  | -1.35992 |
| O  | -1.97956 | 5.44358  | -0.89773 |
| O  | -2.67219 | 2.63624  | 1.18122  |
| O  | 0.14973  | 2.87045  | 1.67986  |
| O  | -1.53656 | 5.07907  | 1.80735  |
| H  | -1.82689 | 0.53056  | -0.95057 |
| H  | -1.01925 | -1.01108 | -1.32300 |
| H  | 3.12969  | -0.42520 | 3.83123  |
| H  | -2.54022 | -0.07280 | 1.90868  |
| H  | 1.21718  | -0.17124 | 3.96651  |
| H  | -1.24935 | 0.09349  | 4.04589  |
| H  | 6.34845  | -1.75115 | 1.32366  |
| H  | 5.51029  | -1.09203 | 3.59116  |
| H  | -6.82787 | -2.55699 | -0.85172 |
| H  | -6.87793 | -0.80608 | -0.53034 |
| H  | -6.84337 | -1.95975 | 0.82451  |
| H  | 5.92589  | -2.32735 | -0.85391 |
| H  | 4.30425  | -2.28329 | -1.57994 |
| H  | 5.32791  | -0.81774 | -1.55300 |

|   |          |          |          |
|---|----------|----------|----------|
| H | -0.59303 | 2.77985  | -1.21937 |
| H | -2.40838 | 2.66680  | 0.23646  |
| H | -2.50815 | 3.55267  | 1.48462  |
| H | -1.89877 | 4.49324  | -1.15650 |
| H | -2.92955 | 5.60837  | -0.93085 |
| H | 0.40979  | 2.88023  | 0.71796  |
| H | -0.73816 | 2.47552  | 1.64494  |
| H | -0.77345 | 4.46523  | 1.82862  |
| H | -1.60908 | 5.32454  | 0.86113  |
| H | -1.91491 | 2.50518  | -2.25154 |
| H | -3.92710 | 0.92905  | -1.90854 |
| H | -5.47497 | 0.85390  | -1.03798 |
| H | -4.01616 | 1.43803  | -0.20042 |
| H | -1.72714 | -3.60631 | 1.42482  |
| H | -1.87167 | -4.32302 | -0.20358 |
| H | -0.81258 | -2.91996 | 0.06346  |
| H | -3.91962 | -4.71482 | 0.93579  |
| H | -5.48792 | -3.95295 | 1.31082  |
| H | -5.17258 | -4.58415 | -0.33689 |
| H | 1.02794  | 3.64561  | -1.22023 |

### 3<sub>C5</sub><sup>+</sup>(I6-P)

|                  |   |                               |
|------------------|---|-------------------------------|
| Energy           | = | -3017.317066                  |
| Enthalpy 0K      | = | -3016.741357                  |
| Enthalpy 298K    | = | -3016.695191                  |
| Free Energy 298K | = | -3016.819315                  |
| Nimag            | = | 0 (12.8035 cm <sup>-1</sup> ) |

|    |          |          |          |
|----|----------|----------|----------|
| C  | -2.83881 | -2.45706 | -0.19957 |
| N  | -2.82469 | -1.13693 | -0.45140 |
| C  | -4.13141 | -0.66871 | -0.55174 |
| C  | -4.94420 | -1.74656 | -0.34131 |
| N  | -4.11493 | -2.83796 | -0.12093 |
| C  | -1.60479 | -0.34547 | -0.59065 |
| C  | -0.78911 | -0.36698 | 0.68361  |
| N  | 0.54780  | -0.48567 | 0.62763  |
| C  | 1.22936  | -0.66579 | 1.78030  |
| C  | 0.60778  | -0.59431 | 3.02355  |
| C  | -0.76176 | -0.38242 | 3.08310  |
| C  | -1.47141 | -0.30539 | 1.89834  |
| C  | 2.66116  | -1.02996 | 1.64593  |
| C  | 3.41180  | -1.42846 | 2.74815  |
| C  | 4.71669  | -1.86092 | 2.55480  |
| C  | 5.21491  | -1.90820 | 1.26464  |
| C  | 4.42443  | -1.48709 | 0.18968  |
| N  | 3.17195  | -1.02753 | 0.39276  |
| Mn | 1.87539  | -0.08325 | -0.99492 |
| C  | 1.51350  | -1.74856 | -1.76855 |
| O  | 1.33320  | -2.75880 | -2.25828 |
| C  | 5.00435  | -1.55826 | -1.18861 |
| C  | -4.47563 | 0.74681  | -0.84171 |
| C  | -6.42572 | -1.86844 | -0.32457 |
| C  | -4.59888 | -4.17912 | 0.16177  |
| C  | -1.65293 | -3.32454 | 0.00101  |
| C  | 0.69037  | 0.76894  | -2.11524 |
| O  | 0.05304  | 1.24310  | -2.93311 |

|   |          |          |          |
|---|----------|----------|----------|
| C | 2.45520  | 1.51887  | -0.12437 |
| O | 0.55447  | 3.43102  | -0.93217 |
| C | 3.05595  | 0.30781  | -2.32835 |
| O | 3.69008  | 0.62066  | -3.22665 |
| O | 2.99674  | 2.36952  | 0.39019  |
| O | -1.94027 | 2.89214  | -1.05213 |
| O | -1.46907 | 5.36796  | -0.44997 |
| O | -2.66051 | 2.47281  | 1.40254  |
| O | 0.13596  | 2.62048  | 1.66665  |
| O | -1.47889 | 4.87502  | 2.23839  |
| H | -1.87292 | 0.69969  | -0.83528 |
| H | -1.03489 | -0.76565 | -1.42562 |
| H | 2.98557  | -1.42220 | 3.74884  |
| H | -2.55179 | -0.17090 | 1.89924  |
| H | 1.17987  | -0.70451 | 3.94219  |
| H | -1.26942 | -0.30203 | 4.04542  |
| H | 6.22348  | -2.27215 | 1.06641  |
| H | 5.32643  | -2.17641 | 3.40312  |
| H | -6.77580 | -2.57547 | -1.09211 |
| H | -6.88689 | -0.89253 | -0.51926 |
| H | -6.78351 | -2.22711 | 0.65280  |
| H | 5.89752  | -2.19509 | -1.18243 |
| H | 4.29449  | -1.97757 | -1.91328 |
| H | 5.31822  | -0.56126 | -1.53002 |
| H | -0.39067 | 3.11871  | -1.11614 |
| H | -2.47233 | 2.61850  | 0.42714  |
| H | -2.52448 | 3.35937  | 1.78629  |
| H | -1.78473 | 4.45274  | -0.74379 |
| H | -2.05228 | 6.00335  | -0.87856 |
| H | 0.33645  | 2.91767  | 0.75113  |
| H | -0.79159 | 2.31845  | 1.59817  |
| H | -0.74184 | 4.23635  | 2.21950  |
| H | -1.49611 | 5.19173  | 1.30912  |
| H | -2.43225 | 2.73692  | -1.86403 |
| H | -4.06406 | 1.06503  | -1.81072 |
| H | -5.56653 | 0.85400  | -0.88500 |
| H | -4.08744 | 1.41909  | -0.06319 |
| H | -1.46262 | -3.47273 | 1.07523  |
| H | -1.80848 | -4.30514 | -0.46645 |
| H | -0.76209 | -2.87292 | -0.44623 |
| H | -3.75550 | -4.83688 | 0.39251  |
| H | -5.27299 | -4.14633 | 1.02718  |
| H | -5.14004 | -4.56972 | -0.70985 |
| H | 0.41054  | 4.38428  | -0.85067 |

### 1<sub>C2</sub>(I9)

|                  |   |                               |
|------------------|---|-------------------------------|
| Energy           | = | -2710.594123                  |
| Enthalpy 0K      | = | -2710.128150                  |
| Enthalpy 298K    | = | -2710.089915                  |
| Free Energy 298K | = | -2710.197440                  |
| Nimag            | = | 0 (21.6925 cm <sup>-1</sup> ) |

|   |         |         |          |
|---|---------|---------|----------|
| C | 1.38173 | 3.47729 | 0.94444  |
| C | 1.29788 | 2.06379 | 0.84120  |
| N | 1.83021 | 1.39803 | -0.23619 |
| C | 2.34464 | 2.13497 | -1.27038 |
| C | 2.41518 | 3.51522 | -1.21219 |



|    |          |          |          |
|----|----------|----------|----------|
| C  | 1.94845  | 4.20035  | -0.07176 |
| C  | 0.61925  | 1.24637  | 1.79227  |
| N  | 0.61373  | -0.12046 | 1.52642  |
| C  | -0.17979 | -0.89122 | 2.35108  |
| C  | -0.86845 | -0.38712 | 3.42875  |
| C  | -0.78434 | 0.99214  | 3.75129  |
| C  | -0.04824 | 1.79205  | 2.91796  |
| C  | -0.34996 | -2.36299 | 2.07772  |
| N  | -0.97168 | -2.64082 | 0.77927  |
| C  | -1.82105 | -1.84236 | 0.13746  |
| N  | -2.18838 | -2.43471 | -0.99695 |
| C  | -1.55358 | -3.65109 | -1.08445 |
| C  | -0.79011 | -3.78257 | 0.03522  |
| C  | -3.07936 | -1.86398 | -1.99725 |
| Mn | 1.80735  | -0.65963 | -0.03993 |
| C  | 2.09093  | -2.36299 | 0.38157  |
| O  | 2.40069  | -3.47082 | 0.56753  |
| C  | 2.79570  | 1.44077  | -2.52183 |
| C  | 1.12832  | -1.18652 | -1.60427 |
| O  | 0.75653  | -1.63130 | -2.61492 |
| C  | 3.54378  | -0.72074 | -0.42781 |
| O  | 4.67542  | -0.79596 | -0.68630 |
| H  | 0.60395  | -2.89937 | 2.10134  |
| H  | -0.99045 | -2.80119 | 2.85320  |
| H  | 0.98830  | 3.98730  | 1.82268  |
| H  | -1.48833 | -1.05696 | 4.02615  |
| H  | 0.01026  | 2.86299  | 3.10979  |
| H  | -1.30699 | 1.40085  | 4.61723  |
| H  | 2.83007  | 4.06376  | -2.05889 |
| H  | 2.01941  | 5.28830  | -0.00970 |
| H  | -1.69760 | -4.31407 | -1.93274 |
| H  | -0.13183 | -4.58277 | 0.36012  |
| H  | -3.88933 | -1.32293 | -1.49408 |
| H  | -3.50095 | -2.68110 | -2.59258 |
| H  | -2.52172 | -1.18214 | -2.65144 |
| H  | 3.05799  | 2.18207  | -3.28779 |
| H  | 3.67330  | 0.80372  | -2.35066 |
| H  | 1.99818  | 0.79629  | -2.91749 |
| H  | -2.14706 | -0.85799 | 0.47448  |
| H  | -2.24286 | 1.38928  | 1.75466  |
| O  | -2.67835 | 1.33319  | 0.89225  |
| H  | -0.23320 | 0.75987  | -1.07806 |
| O  | -4.42364 | 3.21651  | -0.49420 |
| H  | -3.79818 | 2.88946  | 0.17173  |
| H  | -4.02857 | 2.88352  | -1.32373 |
| O  | -5.01533 | 0.49930  | -0.38952 |
| H  | -4.26085 | 0.50376  | 0.22573  |
| H  | -5.22740 | 1.45158  | -0.40159 |
| O  | -0.95672 | 1.40273  | -1.20928 |
| H  | -1.96215 | 1.40640  | 0.22426  |
| H  | -0.50230 | 2.25353  | -1.30529 |
| O  | -3.44215 | 1.52691  | -2.50758 |
| H  | -2.52913 | 1.38243  | -2.20646 |
| H  | -3.97102 | 0.95728  | -1.91848 |

**1c2(TS5)**

Energy = -2710.565951

Enthalpy 0K = -2710.103600  
 Enthalpy 298K = -2710.067038  
 Free Energy 298K = -2710.171027  
 Nimag = 1 (-1164.7140 cm<sup>-1</sup>)

|    |          |          |          |
|----|----------|----------|----------|
| C  | 3.02627  | 2.45122  | 1.03611  |
| C  | 2.32131  | 1.25640  | 0.86615  |
| N  | 2.65813  | 0.35015  | -0.07482 |
| C  | 3.75152  | 0.57101  | -0.84234 |
| C  | 4.49575  | 1.74428  | -0.70427 |
| C  | 4.12431  | 2.70246  | 0.23030  |
| C  | 1.17756  | 0.89171  | 1.72125  |
| N  | 0.58050  | -0.29412 | 1.44969  |
| C  | -0.44323 | -0.67086 | 2.25483  |
| C  | -0.90657 | 0.11647  | 3.30307  |
| C  | -0.30043 | 1.33942  | 3.56936  |
| C  | 0.75970  | 1.72287  | 2.76712  |
| C  | -1.12424 | -1.99130 | 2.03382  |
| N  | -2.22364 | -1.91201 | 1.06740  |
| C  | -2.42351 | -0.96612 | 0.14830  |
| N  | -3.47181 | -1.31470 | -0.59343 |
| C  | -3.95862 | -2.51860 | -0.13834 |
| C  | -3.17102 | -2.89638 | 0.90492  |
| C  | -4.03779 | -0.52905 | -1.68102 |
| Mn | 1.26112  | -1.19663 | -0.30360 |
| C  | 0.11468  | -2.51136 | -0.62638 |
| O  | -0.53844 | -3.41568 | -0.96258 |
| C  | 4.18613  | -0.44999 | -1.85047 |
| C  | 1.05550  | -0.81834 | -1.99899 |
| O  | 0.93063  | -0.63908 | -3.15871 |
| C  | 2.46995  | -2.47119 | 0.00244  |
| O  | 3.24137  | -3.34292 | 0.07239  |
| H  | -0.40499 | -2.74394 | 1.68855  |
| H  | -1.56287 | -2.33825 | 2.97664  |
| H  | 2.72578  | 3.17794  | 1.78792  |
| H  | -1.73957 | -0.24243 | 3.90925  |
| H  | 1.26326  | 2.66888  | 2.95650  |
| H  | -0.64377 | 1.97423  | 4.38747  |
| H  | 5.36787  | 1.89632  | -1.34146 |
| H  | 4.69133  | 3.62892  | 0.33772  |
| H  | -4.81837 | -2.99979 | -0.59596 |
| H  | -3.19414 | -3.77914 | 1.53760  |
| H  | -4.77284 | 0.18328  | -1.28538 |
| H  | -4.51359 | -1.21228 | -2.39299 |
| H  | -3.23804 | 0.02671  | -2.18292 |
| H  | 5.13050  | -0.13927 | -2.31563 |
| H  | 4.33285  | -1.43050 | -1.37897 |
| H  | 3.43291  | -0.57883 | -2.63909 |
| H  | -1.83230 | -0.05994 | 0.01590  |
| H  | -1.51147 | 2.42967  | 1.60105  |
| O  | -1.87346 | 2.52130  | 0.71278  |
| H  | 0.26131  | 0.15358  | -1.06549 |
| O  | -2.43984 | 4.61358  | -1.08600 |
| H  | -2.09348 | 4.11987  | -0.32101 |
| H  | -2.27770 | 3.98050  | -1.81194 |
| O  | -4.29800 | 2.57649  | -0.53829 |
| H  | -3.58115 | 2.35209  | 0.08781  |

|   |          |         |          |
|---|----------|---------|----------|
| H | -4.04475 | 3.49341 | -0.74802 |
| O | -0.42186 | 1.37733 | -1.04652 |
| H | -1.22750 | 2.05389 | 0.08153  |
| H | 0.30952  | 1.97915 | -1.23295 |
| O | -2.39074 | 2.26150 | -2.64603 |
| H | -1.63485 | 1.86992 | -2.13801 |
| H | -3.13508 | 2.19038 | -2.02145 |

### 1<sub>C2</sub>(I10)

|                  |   |                               |
|------------------|---|-------------------------------|
| Energy           | = | -2710.591712                  |
| Enthalpy 0K      | = | -2710.128987                  |
| Enthalpy 298K    | = | -2710.092155                  |
| Free Energy 298K | = | -2710.197831                  |
| Nimag            | = | 0 (16.2577 cm <sup>-1</sup> ) |

|    |          |          |          |
|----|----------|----------|----------|
| C  | 2.54302  | 3.26776  | 0.14896  |
| C  | 2.18664  | 1.93092  | 0.30678  |
| N  | 2.96016  | 0.92118  | -0.14695 |
| C  | 4.18202  | 1.20396  | -0.63756 |
| C  | 4.60327  | 2.53016  | -0.79731 |
| C  | 3.76486  | 3.57196  | -0.43882 |
| C  | 0.97710  | 1.52703  | 1.06118  |
| N  | 0.70018  | 0.20730  | 1.09259  |
| C  | -0.30193 | -0.21072 | 1.88660  |
| C  | -1.07825 | 0.67271  | 2.63543  |
| C  | -0.82455 | 2.03342  | 2.56734  |
| C  | 0.22333  | 2.46376  | 1.77066  |
| C  | -0.61329 | -1.67894 | 2.01070  |
| N  | -1.70583 | -2.09148 | 1.12983  |
| C  | -2.22233 | -1.38721 | 0.11685  |
| N  | -3.14099 | -2.15088 | -0.47526 |
| C  | -3.21359 | -3.36620 | 0.16861  |
| C  | -2.30607 | -3.33079 | 1.18054  |
| C  | -3.96496 | -1.74434 | -1.60383 |
| Mn | 1.88802  | -0.90536 | -0.28809 |
| C  | 0.79096  | -2.27235 | -0.62799 |
| O  | 0.15224  | -3.17161 | -0.97035 |
| C  | 5.12842  | 0.10281  | -1.01082 |
| C  | 2.76914  | -1.55046 | -1.70175 |
| O  | 3.22340  | -2.00333 | -2.66009 |
| C  | 2.86260  | -1.78314 | 0.98057  |
| O  | 3.47662  | -2.40455 | 1.72988  |
| H  | 0.26982  | -2.29082 | 1.79412  |
| H  | -0.92766 | -1.89295 | 3.04009  |
| H  | 1.88475  | 4.06744  | 0.48319  |
| H  | -1.87539 | 0.27551  | 3.26581  |
| H  | 0.46748  | 3.52314  | 1.72225  |
| H  | -1.41955 | 2.74899  | 3.13759  |
| H  | 5.59499  | 2.72364  | -1.20885 |
| H  | 4.06678  | 4.61081  | -0.58356 |
| H  | -3.90091 | -4.14601 | -0.14759 |
| H  | -2.02970 | -4.07462 | 1.92241  |
| H  | -4.97045 | -1.47496 | -1.25551 |
| H  | -4.02188 | -2.57152 | -2.32149 |
| H  | -3.51291 | -0.86819 | -2.08210 |
| H  | 6.16309  | 0.45616  | -0.90788 |
| H  | 4.99136  | -0.78134 | -0.37656 |

|   |          |          |          |
|---|----------|----------|----------|
| H | 4.99038  | -0.19820 | -2.05945 |
| H | -1.95497 | -0.32974 | -0.19529 |
| H | -3.37966 | 2.04641  | 1.71474  |
| O | -3.63286 | 2.06854  | 0.78765  |
| H | 1.04639  | -0.16580 | -1.43766 |
| O | -4.82562 | 3.64298  | -1.13656 |
| H | -4.37933 | 3.33525  | -0.32333 |
| H | -4.35931 | 3.11356  | -1.81317 |
| O | -5.70801 | 1.01474  | -0.60132 |
| H | -4.99373 | 1.15712  | 0.05715  |
| H | -5.85723 | 1.94173  | -0.85860 |
| O | -1.84899 | 1.25090  | -0.71842 |
| H | -2.79662 | 1.77008  | 0.21870  |
| H | -1.01395 | 1.72631  | -0.76746 |
| O | -3.67805 | 1.51102  | -2.57267 |
| H | -2.89184 | 1.43742  | -1.95270 |
| H | -4.39334 | 1.14040  | -2.02595 |

### 1<sub>C2</sub><sup>+</sup>(I11)

|                  |   |                               |
|------------------|---|-------------------------------|
| Energy           | = | -2329.272994                  |
| Enthalpy 0K      | = | -2328.925900                  |
| Enthalpy 298K    | = | -2328.900231                  |
| Free Energy 298K | = | -2328.982041                  |
| Nimag            | = | 1 (20.1967 cm <sup>-1</sup> ) |

|    |          |          |          |
|----|----------|----------|----------|
| N  | 2.63020  | 0.47464  | 0.21513  |
| C  | 2.20554  | 1.70341  | -0.15347 |
| C  | 3.04639  | 2.81317  | -0.14785 |
| C  | 4.35305  | 2.66337  | 0.30045  |
| C  | 4.75487  | 1.42231  | 0.76411  |
| C  | 3.87263  | 0.33547  | 0.71629  |
| C  | 0.76458  | 1.81731  | -0.48129 |
| N  | 0.04395  | 0.68100  | -0.37726 |
| C  | -1.29417 | 0.75422  | -0.47953 |
| C  | -1.94665 | 1.94603  | -0.79089 |
| C  | -1.20027 | 3.10024  | -0.97774 |
| C  | 0.17324  | 3.04085  | -0.79645 |
| C  | -2.09895 | -0.50484 | -0.23695 |
| N  | -3.43647 | -0.22554 | 0.26417  |
| C  | -3.73823 | 0.26407  | 1.51711  |
| C  | -5.09250 | 0.37793  | 1.57813  |
| N  | -5.58866 | -0.04562 | 0.36401  |
| C  | -4.57194 | -0.40575 | -0.41100 |
| H  | -2.96564 | 0.48524  | 2.24853  |
| H  | -5.74594 | 0.71737  | 2.37707  |
| Mn | 1.27494  | -1.04974 | -0.36239 |
| C  | 0.15700  | -2.15852 | -1.20439 |
| O  | -0.47710 | -2.90866 | -1.81074 |
| C  | 4.33779  | -0.98847 | 1.24285  |
| C  | 2.48630  | -2.32857 | -0.67435 |
| O  | 3.20392  | -3.17920 | -0.97481 |
| C  | 0.86656  | -1.58832 | 1.33206  |
| O  | 0.61315  | -2.00513 | 2.37490  |
| H  | -4.64806 | -0.78267 | -1.42855 |
| C  | -6.99775 | -0.09680 | -0.00101 |
| H  | -2.21337 | -1.07609 | -1.16694 |

|   |          |          |          |
|---|----------|----------|----------|
| H | -1.59214 | -1.14222 | 0.49612  |
| H | 2.69132  | 3.78837  | -0.47524 |
| H | -3.03240 | 1.96900  | -0.88440 |
| H | 0.77263  | 3.94402  | -0.89226 |
| H | -1.68621 | 4.04201  | -1.23764 |
| H | 5.75643  | 1.27247  | 1.16982  |
| H | 5.03601  | 3.51471  | 0.31172  |
| H | 5.14606  | -0.83486 | 1.96979  |
| H | 3.52455  | -1.54017 | 1.72994  |
| H | 4.74134  | -1.61363 | 0.43317  |
| H | 1.64827  | -0.62196 | -1.86663 |
| H | -7.43187 | 0.90581  | 0.09492  |
| H | -7.08186 | -0.43905 | -1.03796 |
| H | -7.52040 | -0.79495 | 0.66441  |

### 1<sub>C2</sub>(I11-R)

|                  |   |                               |
|------------------|---|-------------------------------|
| Energy           | = | -2329.366159                  |
| Enthalpy 0K      | = | -2329.022727                  |
| Enthalpy 298K    | = | -2328.996647                  |
| Free Energy 298K | = | -2329.080227                  |
| Nimag            | = | 0 (20.8806 cm <sup>-1</sup> ) |

|    |          |          |          |
|----|----------|----------|----------|
| N  | 2.65244  | 0.45823  | 0.18508  |
| C  | 2.18941  | 1.70731  | -0.18965 |
| C  | 3.07701  | 2.82453  | -0.20067 |
| C  | 4.35996  | 2.67948  | 0.26067  |
| C  | 4.77374  | 1.42670  | 0.75779  |
| C  | 3.89586  | 0.34541  | 0.69394  |
| C  | 0.80305  | 1.81551  | -0.48217 |
| N  | 0.04148  | 0.66269  | -0.34311 |
| C  | -1.29856 | 0.77232  | -0.37360 |
| C  | -1.96435 | 1.95869  | -0.64675 |
| C  | -1.19435 | 3.11676  | -0.91990 |
| C  | 0.16851  | 3.04817  | -0.82813 |
| C  | -2.09063 | -0.49196 | -0.10196 |
| N  | -3.45909 | -0.23087 | 0.32297  |
| C  | -3.83694 | 0.26056  | 1.55277  |
| C  | -5.19269 | 0.37542  | 1.53205  |
| N  | -5.61369 | -0.04765 | 0.29015  |
| C  | -4.54997 | -0.40909 | -0.42049 |
| H  | -3.11036 | 0.48425  | 2.32905  |
| H  | -5.89389 | 0.71614  | 2.28872  |
| Mn | 1.28138  | -1.05745 | -0.37625 |
| C  | 0.13498  | -2.17121 | -1.16166 |
| O  | -0.52450 | -2.93466 | -1.72866 |
| C  | 4.36868  | -0.98594 | 1.20879  |
| C  | 2.48611  | -2.33370 | -0.70274 |
| O  | 3.19901  | -3.19062 | -1.00714 |
| C  | 0.92044  | -1.58149 | 1.32581  |
| O  | 0.69387  | -1.98823 | 2.38132  |
| H  | -4.56415 | -0.78521 | -1.44086 |
| C  | -6.99709 | -0.09704 | -0.16007 |
| H  | -2.15157 | -1.11609 | -1.00130 |
| H  | -1.60476 | -1.08088 | 0.68506  |
| H  | 2.73125  | 3.79457  | -0.55720 |
| H  | -3.05300 | 1.99968  | -0.66308 |

|   |          |          |          |
|---|----------|----------|----------|
| H | 0.77077  | 3.93868  | -1.00821 |
| H | -1.68695 | 4.05586  | -1.18228 |
| H | 5.77036  | 1.28699  | 1.17879  |
| H | 5.04570  | 3.53053  | 0.26309  |
| H | 5.21436  | -0.84607 | 1.89572  |
| H | 3.57063  | -1.52198 | 1.73920  |
| H | 4.71652  | -1.62948 | 0.38771  |
| H | 1.61183  | -0.61399 | -1.90172 |
| H | -7.43475 | 0.90661  | -0.09545 |
| H | -7.01825 | -0.44302 | -1.19884 |
| H | -7.56226 | -0.79149 | 0.47386  |

### 1<sub>C2</sub>(I12-R)

|                  |   |                               |
|------------------|---|-------------------------------|
| Energy           | = | -2711.185371                  |
| Enthalpy 0K      | = | -2710.710700                  |
| Enthalpy 298K    | = | -2710.672915                  |
| Free Energy 298K | = | -2710.779593                  |
| Nimag            | = | 1 (23.1979 cm <sup>-1</sup> ) |

|    |          |          |          |
|----|----------|----------|----------|
| C  | -1.00811 | -3.76329 | -0.23575 |
| N  | -1.12719 | -2.67299 | 0.59396  |
| C  | -2.06917 | -1.86688 | 0.10859  |
| N  | -2.55520 | -2.40365 | -1.00823 |
| C  | -1.90323 | -3.59068 | -1.24730 |
| C  | -0.39431 | -2.46824 | 1.84537  |
| C  | -0.19775 | -1.01046 | 2.18218  |
| N  | 0.54063  | -0.22327 | 1.36850  |
| C  | 0.62938  | 1.12909  | 1.67850  |
| C  | 0.05315  | 1.62589  | 2.89024  |
| C  | -0.65905 | 0.79842  | 3.71316  |
| C  | -0.81803 | -0.55944 | 3.33577  |
| C  | 1.24204  | 1.98885  | 0.72496  |
| C  | 1.36099  | 3.39678  | 0.92325  |
| C  | 1.81237  | 4.19461  | -0.09502 |
| C  | 2.14086  | 3.60623  | -1.33224 |
| C  | 2.07269  | 2.22244  | -1.46769 |
| N  | 1.67473  | 1.41745  | -0.45704 |
| Mn | 1.83374  | -0.69881 | -0.25614 |
| C  | 3.29879  | -0.40816 | 0.79414  |
| O  | 4.24906  | -0.25783 | 1.42170  |
| C  | 2.43361  | 1.61811  | -2.79309 |
| C  | -3.58788 | -1.81963 | -1.85271 |
| C  | 1.98324  | -2.45752 | -0.02466 |
| O  | 2.20329  | -3.59237 | 0.04083  |
| C  | 2.80146  | -1.06567 | -1.71480 |
| O  | 3.40083  | -1.45255 | -2.62182 |
| O  | -1.13052 | 1.04305  | -1.28189 |
| O  | -2.63103 | 1.31136  | 0.94862  |
| O  | -3.66146 | 1.52762  | -2.36408 |
| O  | -5.14854 | 0.71572  | -0.08492 |
| O  | -4.26328 | 3.34888  | -0.31910 |
| H  | 0.55971  | -2.99677 | 1.76059  |
| H  | -0.96368 | -2.95316 | 2.64793  |
| H  | 1.08480  | 3.84175  | 1.87816  |
| H  | -1.41534 | -1.24584 | 3.93587  |
| H  | 0.16562  | 2.67699  | 3.15234  |

|   |          |          |          |
|---|----------|----------|----------|
| H | -1.10861 | 1.17802  | 4.63287  |
| H | 2.45972  | 4.21414  | -2.17962 |
| H | 1.90092  | 5.27437  | 0.04671  |
| H | -2.13516 | -4.20991 | -2.10930 |
| H | -0.30545 | -4.56654 | -0.03630 |
| H | -4.26975 | -1.22769 | -1.23105 |
| H | -4.14496 | -2.63192 | -2.33253 |
| H | -3.13261 | -1.18122 | -2.62030 |
| H | 2.45572  | 2.39458  | -3.56909 |
| H | 3.43006  | 1.15471  | -2.76086 |
| H | 1.70668  | 0.84858  | -3.08792 |
| H | -2.37177 | -0.91265 | 0.54053  |
| H | -2.11491 | 1.36744  | 1.76526  |
| H | 0.52177  | -0.90311 | -1.21484 |
| H | -3.62024 | 2.94981  | 0.28924  |
| H | -3.98973 | 2.96554  | -1.17525 |
| H | -4.34366 | 0.65053  | 0.45932  |
| H | -5.25454 | 1.68530  | -0.10869 |
| H | -1.97522 | 1.25038  | 0.21658  |
| H | -0.58449 | 1.82961  | -1.41995 |
| H | -2.75097 | 1.27369  | -2.12957 |
| H | -4.20520 | 1.03747  | -1.72003 |
| H | -0.46630 | 0.30986  | -1.21900 |

### 1c2(TS6)

Energy = -2711.159466  
 Enthalpy 0K = -2710.689612  
 Enthalpy 298K = -2710.653032  
 Free Energy 298K = -2710.756643  
 Nimag = 1 (-179.1310 cm<sup>-1</sup>)

|    |          |          |          |
|----|----------|----------|----------|
| C  | -0.85150 | -3.77049 | -0.36555 |
| N  | -0.98266 | -2.74247 | 0.54260  |
| C  | -1.95650 | -1.93004 | 0.13464  |
| N  | -2.44577 | -2.39855 | -1.00904 |
| C  | -1.76907 | -3.54862 | -1.34618 |
| C  | -0.22345 | -2.59579 | 1.78517  |
| C  | -0.04482 | -1.15587 | 2.20024  |
| N  | 0.60331  | -0.28779 | 1.38515  |
| C  | 0.64810  | 1.04861  | 1.76297  |
| C  | 0.16995  | 1.44592  | 3.04874  |
| C  | -0.43703 | 0.54089  | 3.87291  |
| C  | -0.58760 | -0.79474 | 3.41870  |
| C  | 1.11610  | 1.98602  | 0.80132  |
| C  | 1.14132  | 3.39058  | 1.03940  |
| C  | 1.44455  | 4.25019  | 0.01708  |
| C  | 1.70848  | 3.72546  | -1.26440 |
| C  | 1.73157  | 2.34847  | -1.44750 |
| N  | 1.49164  | 1.48606  | -0.43101 |
| Mn | 1.76220  | -0.59482 | -0.33953 |
| C  | 3.26082  | -0.26713 | 0.63839  |
| O  | 4.19954  | -0.05214 | 1.25351  |
| C  | 2.00189  | 1.81635  | -2.82469 |
| C  | -3.48266 | -1.75603 | -1.80174 |
| C  | 2.06342  | -2.36588 | -0.18008 |
| O  | 2.39806  | -3.46671 | -0.16250 |

|   |          |          |          |
|---|----------|----------|----------|
| C | 2.74921  | -0.81198 | -1.84707 |
| O | 3.40508  | -1.09820 | -2.74401 |
| O | -1.35223 | 0.75944  | -1.11363 |
| O | -2.59404 | 1.02417  | 0.97312  |
| O | -3.58034 | 1.49603  | -2.32607 |
| O | -5.12171 | 0.74147  | 0.01913  |
| O | -3.88365 | 3.25608  | -0.18160 |
| H | 0.73848  | -3.10112 | 1.65115  |
| H | -0.75932 | -3.13565 | 2.57562  |
| H | 0.89983  | 3.78356  | 2.02591  |
| H | -1.11933 | -1.53550 | 4.01581  |
| H | 0.27316  | 2.48225  | 3.36791  |
| H | -0.81576 | 0.84223  | 4.85146  |
| H | 1.89794  | 4.38252  | -2.11381 |
| H | 1.45733  | 5.32916  | 0.18759  |
| H | -2.00253 | -4.11075 | -2.24612 |
| H | -0.12993 | -4.57132 | -0.23417 |
| H | -4.17224 | -1.22727 | -1.13343 |
| H | -4.02827 | -2.52830 | -2.35554 |
| H | -3.03178 | -1.03691 | -2.49588 |
| H | 1.85864  | 2.61128  | -3.56826 |
| H | 3.03915  | 1.46478  | -2.92074 |
| H | 1.32513  | 0.98678  | -3.07181 |
| H | -2.26653 | -1.00056 | 0.62126  |
| H | -2.02135 | 1.08677  | 1.74571  |
| H | 0.39518  | -1.06346 | -1.33232 |
| H | -3.33150 | 2.67430  | 0.37472  |
| H | -3.72103 | 2.87328  | -1.06720 |
| H | -4.28691 | 0.61569  | 0.51575  |
| H | -5.12925 | 1.71459  | -0.01747 |
| H | -1.96811 | 0.92680  | 0.08064  |
| H | -0.76975 | 1.52353  | -1.18562 |
| H | -2.69578 | 1.19929  | -1.96610 |
| H | -4.19787 | 1.05148  | -1.72136 |
| H | -0.02081 | -0.38404 | -1.10701 |

### 1c2(I13-R)

Energy = -2711.164471  
 Enthalpy 0K = -2710.691974  
 Enthalpy 298K = -2710.654739  
 Free Energy 298K = -2710.759747  
 Nimag = 0 (24.0364 cm<sup>-1</sup>)

|   |          |          |          |
|---|----------|----------|----------|
| C | -0.50962 | -3.76320 | -0.48153 |
| N | -0.75643 | -2.77759 | 0.44924  |
| C | -1.76864 | -2.01949 | 0.02441  |
| N | -2.17020 | -2.48905 | -1.15472 |
| C | -1.39822 | -3.57633 | -1.49595 |
| C | -0.05940 | -2.61243 | 1.72452  |
| C | 0.01286  | -1.16966 | 2.16128  |
| N | 0.59976  | -0.24949 | 1.35624  |
| C | 0.50825  | 1.08556  | 1.72119  |
| C | -0.02424 | 1.44711  | 2.99443  |
| C | -0.54526 | 0.49228  | 3.82088  |
| C | -0.57066 | -0.85337 | 3.37219  |
| C | 0.90885  | 2.04864  | 0.75618  |

|    |          |          |          |
|----|----------|----------|----------|
| C  | 0.78222  | 3.45285  | 0.95898  |
| C  | 1.01691  | 4.31461  | -0.07890 |
| C  | 1.36502  | 3.78988  | -1.34238 |
| C  | 1.54446  | 2.42103  | -1.48894 |
| N  | 1.37184  | 1.56219  | -0.45406 |
| Mn | 1.88329  | -0.46101 | -0.29341 |
| C  | 3.26391  | 0.03427  | 0.78715  |
| O  | 4.12038  | 0.35574  | 1.46968  |
| C  | 1.91172  | 1.88628  | -2.84286 |
| C  | -3.21834 | -1.89274 | -1.97002 |
| C  | 2.35045  | -2.19435 | -0.07377 |
| O  | 2.77986  | -3.25800 | -0.00391 |
| C  | 3.01654  | -0.56495 | -1.71381 |
| O  | 3.78593  | -0.75578 | -2.54173 |
| O  | -1.50831 | 0.83100  | -1.27552 |
| O  | -2.75278 | 0.59475  | 0.91379  |
| O  | -4.03098 | 1.36395  | -2.23333 |
| O  | -5.16586 | 0.12273  | 0.05492  |
| O  | -4.21858 | 2.81323  | 0.21396  |
| H  | 0.93385  | -3.06155 | 1.62258  |
| H  | -0.59397 | -3.19429 | 2.48564  |
| H  | 0.47563  | 3.83830  | 1.93047  |
| H  | -1.04852 | -1.63406 | 3.96421  |
| H  | -0.02734 | 2.49251  | 3.30140  |
| H  | -0.96109 | 0.76150  | 4.79379  |
| H  | 1.50159  | 4.44333  | -2.20463 |
| H  | 0.91070  | 5.39258  | 0.06247  |
| H  | -1.55116 | -4.12539 | -2.42093 |
| H  | 0.26278  | -4.51365 | -0.34014 |
| H  | -3.98317 | -1.46182 | -1.31292 |
| H  | -3.66656 | -2.67528 | -2.59257 |
| H  | -2.79485 | -1.10231 | -2.60124 |
| H  | 1.65715  | 2.62155  | -3.61749 |
| H  | 2.99285  | 1.69914  | -2.91732 |
| H  | 1.37825  | 0.95186  | -3.06447 |
| H  | -2.17103 | -1.10293 | 0.51102  |
| H  | -2.34996 | 0.65754  | 1.78652  |
| H  | 0.64570  | -1.11624 | -1.42074 |
| H  | -3.61122 | 2.13084  | 0.58479  |
| H  | -4.16326 | 2.60322  | -0.73442 |
| H  | -4.26806 | 0.15372  | 0.49552  |
| H  | -5.43051 | 1.04517  | 0.19388  |
| H  | -1.90945 | 0.78489  | -0.33240 |
| H  | -0.91547 | 1.59014  | -1.25249 |
| H  | -3.08564 | 1.20720  | -2.02522 |
| H  | -4.47928 | 0.79684  | -1.57648 |
| H  | 0.25689  | -0.47686 | -1.14185 |

### **1<sub>C2</sub><sup>+</sup>(I14)**

|                  |                                 |
|------------------|---------------------------------|
| Energy           | = -2329.83578878                |
| Enthalpy 0K      | = -2329.481846                  |
| Enthalpy 298K    | = -2329.455155                  |
| Free Energy 298K | = -2329.538267                  |
| Nimag            | = 0 (27.8293 cm <sup>-1</sup> ) |

|   |          |          |          |
|---|----------|----------|----------|
| C | -4.58491 | -0.39582 | -0.42243 |
|---|----------|----------|----------|

|    |          |          |          |
|----|----------|----------|----------|
| N  | -3.46066 | -0.23280 | 0.27414  |
| C  | -3.78070 | 0.23615  | 1.52955  |
| C  | -5.13548 | 0.35430  | 1.57156  |
| N  | -5.61351 | -0.04513 | 0.34201  |
| C  | -2.11555 | -0.50052 | -0.21245 |
| C  | -1.30598 | 0.76069  | -0.44264 |
| N  | 0.04317  | 0.65207  | -0.39941 |
| C  | 0.80163  | 1.81150  | -0.49913 |
| C  | 0.17162  | 3.04934  | -0.82208 |
| C  | -1.18861 | 3.11866  | -0.93155 |
| C  | -1.95840 | 1.95115  | -0.69592 |
| C  | 2.18497  | 1.70029  | -0.18829 |
| N  | 2.64469  | 0.44488  | 0.16903  |
| C  | 3.88777  | 0.32332  | 0.69676  |
| C  | 4.75238  | 1.40583  | 0.78961  |
| C  | 4.34298  | 2.66771  | 0.30965  |
| C  | 3.06751  | 2.81781  | -0.16617 |
| Mn | 1.28900  | -1.02625 | -0.42677 |
| C  | 0.89563  | -1.45225 | 1.29337  |
| O  | 0.65300  | -1.68068 | 2.38632  |
| C  | 4.36578  | -1.01182 | 1.19239  |
| C  | -7.01619 | -0.08203 | -0.04728 |
| C  | 0.10577  | -2.21403 | -1.12368 |
| O  | -0.55634 | -3.03370 | -1.57628 |
| C  | 2.46748  | -2.40215 | -0.59907 |
| O  | 3.11360  | -3.33445 | -0.75957 |
| H  | -3.01914 | 0.44295  | 2.27646  |
| H  | -5.80053 | 0.68237  | 2.36561  |
| H  | -4.64613 | -0.75346 | -1.44780 |
| H  | -2.22304 | -1.06828 | -1.14551 |
| H  | -1.62597 | -1.14451 | 0.52709  |
| H  | 2.72216  | 3.79288  | -0.50755 |
| H  | -3.04674 | 1.99285  | -0.72337 |
| H  | 0.77551  | 3.94482  | -0.96580 |
| H  | -1.68062 | 4.06248  | -1.17517 |
| H  | 5.74296  | 1.26349  | 1.22293  |
| H  | 5.02645  | 3.51941  | 0.33879  |
| H  | 5.20667  | -0.87316 | 1.88450  |
| H  | 3.57785  | -1.56529 | 1.72020  |
| H  | 4.73041  | -1.63524 | 0.36300  |
| H  | 2.08314  | -0.49536 | -1.98206 |
| H  | -7.44567 | 0.92216  | 0.05341  |
| H  | -7.08509 | -0.41092 | -1.08959 |
| H  | -7.55519 | -0.78461 | 0.60024  |
| H  | 1.31390  | -0.40750 | -2.14343 |

### **1<sub>C2</sub><sup>+</sup>(I11-P)**

|                  |                                 |
|------------------|---------------------------------|
| Energy           | = -2711.084269                  |
| Enthalpy 0K      | = -2710.606350                  |
| Enthalpy 298K    | = -2710.568586                  |
| Free Energy 298K | = -2710.675518                  |
| Nimag            | = 0 (14.2219 cm <sup>-1</sup> ) |

|   |          |          |          |
|---|----------|----------|----------|
| C | -0.94084 | -3.81012 | -0.23866 |
| N | -1.00641 | -2.71954 | 0.59860  |
| C | -1.98117 | -1.91312 | 0.17593  |

|    |          |          |          |
|----|----------|----------|----------|
| N  | -2.53350 | -2.45026 | -0.90893 |
| C  | -1.89705 | -3.63600 | -1.19070 |
| C  | -0.19835 | -2.55197 | 1.80592  |
| C  | 0.00792  | -1.11390 | 2.20666  |
| N  | 0.63479  | -0.24304 | 1.38806  |
| C  | 0.71084  | 1.04826  | 1.77101  |
| C  | 0.26978  | 1.47869  | 3.02675  |
| C  | -0.32004 | 0.57125  | 3.88976  |
| C  | -0.48389 | -0.73630 | 3.45451  |
| C  | 1.23533  | 2.01313  | 0.77284  |
| C  | 1.22051  | 3.38365  | 1.02272  |
| C  | 1.62709  | 4.25717  | 0.02411  |
| C  | 2.00902  | 3.72980  | -1.19705 |
| C  | 2.01292  | 2.34411  | -1.39415 |
| N  | 1.65183  | 1.49903  | -0.40543 |
| Mn | 1.83120  | -0.62852 | -0.35088 |
| C  | 3.38255  | -0.41465 | 0.59601  |
| O  | 4.38149  | -0.30928 | 1.14930  |
| C  | 2.39358  | 1.81655  | -2.74107 |
| C  | -3.61531 | -1.87026 | -1.69303 |
| C  | 1.99919  | -2.40233 | -0.23695 |
| O  | 2.23518  | -3.53265 | -0.26018 |
| C  | 2.67323  | -0.93078 | -1.90310 |
| O  | 3.17758  | -1.28236 | -2.87642 |
| O  | -1.20900 | 1.17889  | -1.24590 |
| O  | -2.74888 | 1.37029  | 0.95947  |
| O  | -3.80892 | 1.45074  | -2.30441 |
| O  | -5.22595 | 0.56767  | -0.00542 |
| O  | -4.56159 | 3.26193  | -0.30006 |
| H  | 0.75784  | -3.05965 | 1.64599  |
| H  | -0.70573 | -3.07804 | 2.62370  |
| H  | 0.88260  | 3.77835  | 1.97780  |
| H  | -0.98824 | -1.47527 | 4.07742  |
| H  | 0.37992  | 2.51700  | 3.33149  |
| H  | -0.67015 | 0.88445  | 4.87434  |
| H  | 2.30528  | 4.38083  | -2.02020 |
| H  | 1.62502  | 5.33485  | 0.19565  |
| H  | -2.18257 | -4.25422 | -2.03719 |
| H  | -0.23001 | -4.61591 | -0.08218 |
| H  | -4.27801 | -1.29893 | -1.03317 |
| H  | -4.17953 | -2.68556 | -2.15891 |
| H  | -3.20655 | -1.21409 | -2.47165 |
| H  | 2.43218  | 2.63770  | -3.46754 |
| H  | 3.38764  | 1.34856  | -2.71446 |
| H  | 1.66310  | 1.07487  | -3.09160 |
| H  | -2.26426 | -0.95985 | 0.62323  |
| H  | -2.25297 | 1.44208  | 1.78533  |
| H  | 0.46721  | -0.77056 | -1.22662 |
| H  | -3.88044 | 2.93477  | 0.30885  |
| H  | -4.26095 | 2.88747  | -1.15080 |
| H  | -4.40551 | 0.58161  | 0.51919  |
| H  | -5.41750 | 1.52333  | -0.04287 |
| H  | -2.08226 | 1.34705  | 0.23655  |
| H  | -0.71976 | 1.97200  | -1.50898 |
| H  | -2.88227 | 1.26678  | -2.07159 |
| H  | -4.31498 | 0.93497  | -1.64969 |
| H  | -0.53728 | 0.45391  | -1.24613 |

### 1<sub>C2</sub><sup>+</sup>(TS7)

|                  |   |                                 |
|------------------|---|---------------------------------|
| Energy           | = | -2711.054803                    |
| Enthalpy 0K      | = | -2710.582603                    |
| Enthalpy 298K    | = | -2710.546056                    |
| Free Energy 298K | = | -2710.649700                    |
| Nimag            | = | 1 (-430.6366 cm <sup>-1</sup> ) |

|    |          |          |          |
|----|----------|----------|----------|
| C  | -1.15459 | -3.69104 | -0.37252 |
| N  | -1.18081 | -2.64784 | 0.52877  |
| C  | -2.13684 | -1.78938 | 0.16652  |
| N  | -2.71124 | -2.24537 | -0.94193 |
| C  | -2.11330 | -3.43161 | -1.30176 |
| C  | -0.37703 | -2.57148 | 1.74659  |
| C  | -0.08442 | -1.15912 | 2.18571  |
| N  | 0.57917  | -0.30169 | 1.38423  |
| C  | 0.72794  | 0.97555  | 1.79209  |
| C  | 0.32760  | 1.39818  | 3.06220  |
| C  | -0.30458 | 0.50237  | 3.90832  |
| C  | -0.54602 | -0.78337 | 3.44528  |
| C  | 1.26815  | 1.93482  | 0.79690  |
| C  | 1.31322  | 3.30005  | 1.06051  |
| C  | 1.70573  | 4.16918  | 0.05040  |
| C  | 2.00219  | 3.64496  | -1.19467 |
| C  | 1.95016  | 2.26171  | -1.40524 |
| N  | 1.62303  | 1.42262  | -0.40270 |
| Mn | 1.72682  | -0.68726 | -0.37246 |
| C  | 3.26486  | -0.54116 | 0.61682  |
| O  | 4.22646  | -0.45853 | 1.22413  |
| C  | 2.23021  | 1.73754  | -2.77849 |
| C  | -3.78171 | -1.58248 | -1.67304 |
| C  | 1.87086  | -2.48982 | -0.26988 |
| O  | 2.09933  | -3.61368 | -0.30048 |
| C  | 2.71170  | -0.96131 | -1.88144 |
| O  | 3.34168  | -1.28374 | -2.78042 |
| O  | -1.24761 | 0.90616  | -1.03856 |
| O  | -2.56298 | 1.17529  | 0.96320  |
| O  | -3.48848 | 1.59787  | -2.34471 |
| O  | -5.08571 | 1.12920  | 0.01246  |
| O  | -3.59208 | 3.51235  | -0.28979 |
| H  | 0.54542  | -3.13868 | 1.58715  |
| H  | -0.92358 | -3.08194 | 2.54869  |
| H  | 1.02898  | 3.69624  | 2.03257  |
| H  | -1.09021 | -1.50626 | 4.05324  |
| H  | 0.49459  | 2.42244  | 3.38804  |
| H  | -0.63005 | 0.81110  | 4.90269  |
| H  | 2.27128  | 4.29535  | -2.02755 |
| H  | 1.75082  | 5.24417  | 0.23248  |
| H  | -2.42603 | -3.99005 | -2.17968 |
| H  | -0.47278 | -4.53020 | -0.26901 |
| H  | -4.34379 | -0.94069 | -0.98486 |
| H  | -4.44729 | -2.34831 | -2.08726 |
| H  | -3.36458 | -0.96931 | -2.48093 |
| H  | 2.15380  | 2.55263  | -3.50901 |
| H  | 3.25142  | 1.33557  | -2.84467 |
| H  | 1.51391  | 0.95414  | -3.05832 |
| H  | -2.37881 | -0.83927 | 0.65909  |
| H  | -2.06845 | 1.30905  | 1.77842  |

|   |          |          |          |
|---|----------|----------|----------|
| H | 0.35180  | -1.00877 | -1.37915 |
| H | -3.12876 | 2.87915  | 0.28994  |
| H | -3.48624 | 3.07922  | -1.15866 |
| H | -4.25502 | 0.97725  | 0.51409  |
| H | -5.04991 | 2.09786  | -0.06003 |
| H | -1.86983 | 1.07478  | 0.06890  |
| H | -0.75901 | 1.72249  | -1.19440 |
| H | -2.63200 | 1.27184  | -1.96484 |
| H | -4.13736 | 1.26248  | -1.70166 |
| H | -0.00933 | -0.30567 | -1.11457 |

**1<sub>C2</sub><sup>+</sup>(I12-P)**

|                  |   |                               |
|------------------|---|-------------------------------|
| Energy           | = | -2711.059391                  |
| Enthalpy 0K      | = | -2710.583501                  |
| Enthalpy 298K    | = | -2710.546515                  |
| Free Energy 298K | = | -2710.650455                  |
| Nimag            | = | 0 (24.4073 cm <sup>-1</sup> ) |

|    |          |          |          |
|----|----------|----------|----------|
| C  | -0.38401 | -3.76246 | -0.54249 |
| N  | -0.65590 | -2.79319 | 0.40028  |
| C  | -1.70105 | -2.06797 | -0.00726 |
| N  | -2.09449 | -2.54028 | -1.18706 |
| C  | -1.28797 | -3.59651 | -1.54573 |
| C  | 0.03056  | -2.63643 | 1.67881  |
| C  | 0.07737  | -1.20252 | 2.14678  |
| N  | 0.57710  | -0.23352 | 1.35470  |
| C  | 0.45906  | 1.04909  | 1.75405  |
| C  | -0.02078 | 1.38960  | 3.01945  |
| C  | -0.45482 | 0.38615  | 3.86963  |
| C  | -0.44603 | -0.92263 | 3.40666  |
| C  | 0.79449  | 2.08278  | 0.74513  |
| C  | 0.48025  | 3.42206  | 0.95001  |
| C  | 0.68257  | 4.32614  | -0.08523 |
| C  | 1.15863  | 3.85253  | -1.29488 |
| C  | 1.46998  | 2.49594  | -1.44610 |
| N  | 1.31937  | 1.63664  | -0.41851 |
| Mn | 1.89285  | -0.38575 | -0.31401 |
| C  | 3.27546  | 0.09278  | 0.79463  |
| O  | 4.13367  | 0.39239  | 1.48096  |
| C  | 1.93535  | 2.01285  | -2.78337 |
| C  | -3.18089 | -1.98770 | -1.98370 |
| C  | 2.39679  | -2.12227 | -0.13151 |
| O  | 2.84548  | -3.17533 | -0.07851 |
| C  | 3.06118  | -0.43670 | -1.72128 |
| O  | 3.84094  | -0.59393 | -2.54185 |
| O  | -1.50712 | 0.87874  | -1.23814 |
| O  | -2.72776 | 0.48897  | 0.94870  |
| O  | -4.09422 | 1.20111  | -2.20758 |
| O  | -5.14371 | -0.02465 | 0.09875  |
| O  | -4.21288 | 2.71153  | 0.21496  |
| H  | 1.03525  | -3.06191 | 1.58640  |
| H  | -0.49557 | -3.23694 | 2.43092  |
| H  | 0.05663  | 3.76349  | 1.89185  |
| H  | -0.84487 | -1.73489 | 4.01483  |
| H  | -0.06455 | 2.42840  | 3.33941  |
| H  | -0.83113 | 0.62497  | 4.86536  |

|   |          |          |          |
|---|----------|----------|----------|
| H | 1.28896  | 4.52117  | -2.14624 |
| H | 0.44182  | 5.38218  | 0.04774  |
| H | -1.43093 | -4.14255 | -2.47407 |
| H | 0.41123  | -4.49101 | -0.41449 |
| H | -3.93167 | -1.55466 | -1.31246 |
| H | -3.63417 | -2.79715 | -2.56691 |
| H | -2.79570 | -1.21142 | -2.65578 |
| H | 1.68753  | 2.75493  | -3.55250 |
| H | 3.02718  | 1.88396  | -2.79544 |
| H | 1.45647  | 1.06230  | -3.05264 |
| H | -2.13166 | -1.17205 | 0.49843  |
| H | -2.43951 | 0.58471  | 1.86236  |
| H | 0.68824  | -1.03224 | -1.46206 |
| H | -3.61281 | 2.02926  | 0.59055  |
| H | -4.19746 | 2.46810  | -0.72650 |
| H | -4.24028 | 0.04682  | 0.52489  |
| H | -5.46734 | 0.87417  | 0.25762  |
| H | -1.89711 | 0.78510  | -0.29931 |
| H | -1.18822 | 1.78813  | -1.27846 |
| H | -3.14741 | 1.06094  | -2.00484 |
| H | -4.53041 | 0.64365  | -1.53320 |
| H | 0.29139  | -0.39035 | -1.19092 |

**1<sub>C2</sub><sup>2+</sup>(I13-P)**

|                  |   |                               |
|------------------|---|-------------------------------|
| Energy           | = | -2329.728765                  |
| Enthalpy 0K      | = | -2329.370780                  |
| Enthalpy 298K    | = | -2329.344672                  |
| Free Energy 298K | = | -2329.425926                  |
| Nimag            | = | 1 (28.5382 cm <sup>-1</sup> ) |

|    |          |          |          |
|----|----------|----------|----------|
| N  | 2.64251  | 0.47357  | 0.18433  |
| C  | 2.20288  | 1.70587  | -0.16264 |
| C  | 3.03616  | 2.81870  | -0.14863 |
| C  | 4.34793  | 2.67041  | 0.28615  |
| C  | 4.76375  | 1.42700  | 0.72708  |
| C  | 3.89224  | 0.33250  | 0.66975  |
| C  | 0.75650  | 1.82092  | -0.47268 |
| N  | 0.03320  | 0.68274  | -0.38602 |
| C  | -1.30792 | 0.75831  | -0.47191 |
| C  | -1.95864 | 1.96083  | -0.73814 |
| C  | -1.21215 | 3.11700  | -0.90697 |
| C  | 0.16366  | 3.05114  | -0.75061 |
| C  | -2.12304 | -0.50102 | -0.26525 |
| N  | -3.45823 | -0.22742 | 0.24064  |
| C  | -3.75843 | 0.22934  | 1.50702  |
| C  | -5.11211 | 0.34469  | 1.57044  |
| N  | -5.60940 | -0.04572 | 0.34544  |
| C  | -4.59483 | -0.38758 | -0.43938 |
| C  | -7.01917 | -0.08388 | -0.01991 |
| Mn | 1.29171  | -1.02447 | -0.42429 |
| C  | 2.47802  | -2.40928 | -0.58024 |
| O  | 3.12595  | -3.33772 | -0.73004 |
| C  | 4.38298  | -0.99290 | 1.16513  |
| C  | 0.88672  | -1.46416 | 1.31269  |
| O  | 0.63724  | -1.72460 | 2.39331  |
| C  | 0.11006  | -2.23355 | -1.11355 |

|   |          |          |          |
|---|----------|----------|----------|
| O | -0.54271 | -3.06210 | -1.55462 |
| H | -2.23964 | -1.03953 | -1.21505 |
| H | -1.63215 | -1.16367 | 0.45576  |
| H | 2.67273  | 3.79664  | -0.45698 |
| H | -3.04532 | 1.99095  | -0.81179 |
| H | 0.76265  | 3.95531  | -0.83359 |
| H | -1.69996 | 4.06602  | -1.13444 |
| H | 5.76982  | 1.27887  | 1.12116  |
| H | 5.02448  | 3.52652  | 0.30386  |
| H | -5.76471 | 0.66451  | 2.37813  |
| H | -2.98536 | 0.42896  | 2.24413  |
| H | -7.44869 | 0.91855  | 0.09614  |
| H | -7.54365 | -0.79262 | 0.63266  |
| H | -7.10495 | -0.40573 | -1.06323 |
| H | 5.20648  | -0.83736 | 1.87360  |
| H | 3.59710  | -1.56314 | 1.67530  |
| H | 4.78126  | -1.59660 | 0.33656  |
| H | -4.67205 | -0.73822 | -1.46623 |
| H | 2.08746  | -0.53467 | -1.95472 |
| H | 1.31380  | -0.51578 | -2.14411 |
